# Supplementary material for: GWAS and functional studies suggest a role for altered DNA repair in the evolution of drug resistance in Mycobacterium tuberculosis
Source: eLife. 2023 Jan 25;12:e75860. doi: 10.7554/eLife.75860 (PMC9876569; doi:10.7554/eLife.75860)
Supplement: Figure 2—source data 1. [file elife-75860-fig2-data1.xlsx]

## Sheet: Sheet1
	Figure 2c: Pie chart
	Change	SNPs/variants
	Synonymous change	62
	Non-synonymous change	85
	Upstream gene variant	27
	Stop/frameshift mutations	14
	Total	188
	Figure 2d: Pie chart
	Category	Non-synonymous variants
	Conserved proteins	18
	Regulatory proteins	7
	Membrane associated proteins	7
	Intermediary metabolism	24
	Transporters	7
	Lipid Metabolism	8
	Virulence	5
	Cell division	3
	DNA repair	6
	Total	85
	Figure 2e: Pie chart
	Category	Synonymous variants
	Conserved proteins	12
	Regulatory proteins	3
	Membrane associated proteins	13
	Intermediary metabolism	25
	Transporters	2
	Lipid Metabolism	5
	Virulence	1
	DNA repair	1
	Total	62
	Figure 2f
	Codon change	No. of codons	Ratio	Percent change
	Abundant/moderate to rare codon	47	0.758065	75.8065
	Rare to abundant/moderate	15	0.241935	24.1935
	Total synonumous changes	62
