# Supplementary material for: GWAS and functional studies suggest a role for altered DNA repair in the evolution of drug resistance in Mycobacterium tuberculosis
Source: eLife. 2023 Jan 25;12:e75860. doi: 10.7554/eLife.75860 (PMC9876569; doi:10.7554/eLife.75860)
Supplement: Figure 3—figure supplement 2—source data 1. [file elife-75860-fig3-figsupp2-data1.xlsx]

## Sheet: Sheet1
	Figure 3-Figure Supplement 2a&c: Rifampicn
		Mutation frequency
	Strains	Average	SD	N	Fold increase
	Rv	1.42096e-09	1.00477e-09	4	1
	RvDmutY	1.42091e-08	9.15724e-09	4	9.99966
	RvDmutY::mutY	1.72414e-09	1.40775e-09	4	1.21336
	RvDmutY::mutY-R262Q	1.65816e-08	5.16122e-09	4	11.6693
	Figure 3-Figure Supplement 2b&c: Isoniazid
		Mutation frequency
	Strains	Average	SD	N	Fold increase
	Rv	2.04263e-08	2.12155e-09	4	1
	RvDmutY	1.44236e-07	1.36071e-08	4	7.06129
	RvDmutY::mutY	4.91379e-08	1.7155e-08	4	2.40562
	RvDmutY::mutY-R262Q	1.1301e-07	9.622e-09	4	5.53259
