# Supplementary material for: GWAS and functional studies suggest a role for altered DNA repair in the evolution of drug resistance in Mycobacterium tuberculosis
Source: eLife. 2023 Jan 25;12:e75860. doi: 10.7554/eLife.75860 (PMC9876569; doi:10.7554/eLife.75860)
Supplement: Figure 3—source data 1. [file elife-75860-fig3-data1.xlsx]

## Sheet: Source data-Figure 3
Figure 3g: Isoniazid
	Colonies on 7H11-plain plates							Figure 3b& c: Rifampicin
Strains	-6		Average	SD	Strains	No. of colonies on Inh plates			Mutation frequency
Rv	26	9.41497	9.38246	0.114443	Rv	10		Strains	Average	SD	N	Fold increase
Rv	18	9.25527			Rv	20		Msm	1.07143e-10	8.1245e-11	6	1
Rv	30	9.47712			Rv	5		MsmDmutY	4.63415e-10	2.398e-10	6	4.3252
RvDmutY	65	9.81291	9.65709	0.153918	Rv	8		MsmDmutY::mutY	6.73469e-11	8.0098e-11	6	0.628571
RvDmutY	32	9.50515			Rv	6		MsmDmutY::mutY-R262Q	3.55263e-10	1.176e-10	6	3.31579
RvDmutY	45	9.65321			Rv	8
RvDmutY::mutY	33	9.51851	9.51997	0.122763	RvDmutY	42
RvDmutY::mutY	44	9.64345			RvDmutY	50		Figure 3e& f : Rifampicin
RvDmutY::mutY	25	9.39794			RvDmutY	55			Mutation frequency
RvDmutY::mutY-R262Q	29	9.4624	9.54422	0.0728541	RvDmutY	66		Strains	Average	SD	N	Fold increase
RvDmutY::mutY-R262Q	40	9.60206			RvDmutY	45		Msm	2.08333e-09	1.8042e-09	3	1
RvDmutY::mutY-R262Q	37	9.5682			RvDmutY	75		MsmDuvrB	1.47368e-08	1.8232e-09	3	7.07368
					RvDmutY::mutY	5		MsmDuvrB::uvrB	5.26316e-09	5.2632e-09	3	2.52632
					RvDmutY::mutY	8		MsmDuvrB::uvrB-A524V	2.20339e-08	2.9357e-09	3	10.5763
					RvDmutY::mutY	8
					RvDmutY::mutY	7
					RvDmutY::mutY	23
					RvDmutY::mutY	12
					RvDmutY::mutY-R262Q	43
					RvDmutY::mutY-R262Q	50
					RvDmutY::mutY-R262Q	38
					RvDmutY::mutY-R262Q	35
					RvDmutY::mutY-R262Q	40
					RvDmutY::mutY-R262Q	48
Figure 3h: Rifampicin
	Colonies on 7H11-plain plates
Strains	-6		Average	SD	Strains	No. of colonies on rif plates
Rv	16	9.20412	9.34766	0.137044	Rv	4
Rv	23	9.36173			Rv	6
Rv	30	9.47712			Rv	10
RvDmutY	65	9.81291	9.67539	0.122087	Rv	7
RvDmutY	43	9.63347			Rv	4
RvDmutY	38	9.57978			Rv	6
RvDmutY::mutY	32	9.50515	9.51551	0.123084	RvDmutY	88
RvDmutY::mutY	44	9.64345			RvDmutY	76
RvDmutY::mutY	25	9.39794			RvDmutY	95
RvDmutY::mutY-R262Q	46	9.66276	9.54297	0.1342	RvDmutY	77
RvDmutY::mutY-R262Q	25	9.39794			RvDmutY	69
RvDmutY::mutY-R262Q	37	9.5682			RvDmutY	65
					RvDmutY::mutY	5
					RvDmutY::mutY	5
					RvDmutY::mutY	8
					RvDmutY::mutY	7
					RvDmutY::mutY	10
					RvDmutY::mutY	15
					RvDmutY::mutY-R262Q	50
					RvDmutY::mutY-R262Q	38
					RvDmutY::mutY-R262Q	48
					RvDmutY::mutY-R262Q	66
					RvDmutY::mutY-R262Q	40
					RvDmutY::mutY-R262Q	58
Figure 3i: Ciprofloxacin
	Colonies on 7H11-plain plates
Strains	-6		Average	SD	Strains	No. of colonies on Cipro plates
Rv	22	9.34242	9.47241	0.154656	Rv	8
Rv	27	9.43136			Rv	10
Rv	44	9.64345			Rv	2
RvDmutY	50	9.69897	9.6179	0.0838736	Rv	3
RvDmutY	34	9.53148			Rv	2
RvDmutY	42	9.62325			Rv	6
RvDmutY::mutY	30	9.47712	9.49609	0.0760063	RvDmutY	44
RvDmutY::mutY	38	9.57978			RvDmutY	69
RvDmutY::mutY	27	9.43136			RvDmutY	53
RvDmutY::mutY-R262Q	43	9.63347	9.53737	0.0932947	RvDmutY	88
RvDmutY::mutY-R262Q	28	9.44716			RvDmutY	63
RvDmutY::mutY-R262Q	34	9.53148			RvDmutY	70
					RvDmutY::mutY	7
					RvDmutY::mutY	11
					RvDmutY::mutY	15
					RvDmutY::mutY	5
					RvDmutY::mutY	9
					RvDmutY::mutY	3
					RvDmutY::mutY-R262Q	40
					RvDmutY::mutY-R262Q	53
					RvDmutY::mutY-R262Q	45
					RvDmutY::mutY-R262Q	60
					RvDmutY::mutY-R262Q	51
					RvDmutY::mutY-R262Q	49
Figure 3j
Rifampicin	Mutation rate					Isoniazid	Mutation rate					Ciprofloxacin	Mutation rate
Strains	Average	SD	N	Fold increase	ANOVA test	Strains	Average	SD	N	Fold increase	ANOVA test	Strains	Average	SD	N	Fold increase	ANOVA test
Rv	2.4*10-10	0.8*10-10	6	1		Rv	3.4*10-8	1.9*10-8	6	1		Rv	1.4*10-10	0.95*10-10	6	1
RvDmutY	13.5*10-10	1.9*10-10	6	5.625	Rv versus RvDmutY<0.0001	RvDmutY	9.87*10-8	2.13*10-8	6	2.90294	Rv versus RvDmutY<0.0001	RvDmutY	12.8*10-10	3.02*10-10	6	9.14286	Rv versus RvDmutY<0.0001
RvDmutY::mutY	2.12*1010	0.96*10-10	6	1.13208	Rv versus RvDmutY::mutY = 0.9503	RvDmutY::mutY	2.6*10-8	1.6*10-8	6	0.764706	Rv versus RvDmutY::mutY=0.7999	RvDmutY::mutY	2.2*10-10	0.011*1010	6	1.57143	Rv versus RvDmutY::mutY=0.782
RvDmutY::mutY-R262Q	12.25*10-10	0.025*10-10	6	5.10417	Rv versus RvDmutY::mutY R262Q <0.0001	RvDmutY::mutY-R262Q	10.23*10-8	1.8*10-8	6	3.00882	Rv versus RvDmutY::mutY R262Q <0.0001	RvDmutY::mutY-R262Q	12.2*10-10	1.69*10-10	6	8.71429	Rv versus RvDmutY::mutY R262Q <0.0001
