# Supplementary material for: GWAS and functional studies suggest a role for altered DNA repair in the evolution of drug resistance in Mycobacterium tuberculosis
Source: eLife. 2023 Jan 25;12:e75860. doi: 10.7554/eLife.75860 (PMC9876569; doi:10.7554/eLife.75860)
Supplement: Figure 4—source data 1. [file elife-75860-fig4-data1.xlsx]

## Sheet: Sheet1
Figure 4a: No antibiotic
	Day 0				ANOVA test	Day 3				ANOVA test	Day 6				ANOVA test	Day 9				ANOVA test
Strains			Average	SD				Average	SD				Average	SD
Rv	27000000	7.43136	7.43509	0.0945831		380000000	8.57978	8.41292	0.153157		45000000000	10.6532	10.6562	0.0666553		11.4314	11.4314	11.5164	0.0912348
Rv	34000000	7.53148				240000000	8.38021				53000000000	10.7243				11.5051	11.5051
Rv	22000000	7.34242				190000000	8.27875				39000000000	10.5911				11.6128	11.6128
RvDmutY	18000000	7.25527	7.34663	0.105698	Rv versus RvDmutY= 0.6703	330000000	8.51851	8.51997	0.122763	Rv versus RvDmutY=0.7269	63000000000	10.7993	10.7346	0.0636503	Rv versus RvDmutY=0.5973	11.6532	11.6532	11.5447	0.0980671	Rv versus RvDmutY=0.9696
RvDmutY	29000000	7.4624				440000000	8.64345				47000000000	10.6721				11.4624	11.4624
RvDmutY	21000000	7.32222				250000000	8.39794				54000000000	10.7324				11.5185	11.5185
RvDmutY::mutY	19000000	7.27875	7.34231	0.0914783	Rv versus RvDmutY::mutY = 0.641	430000000	8.63347	8.44786	0.177932	Rv versus RvDmutY::mutY = 0.9836	38000000000	10.5798	10.6528	0.0686484	Rv versus RvDmutY::mutY = >0.9999	11.3424	11.3424	11.3792	0.0362859	Rv versus RvDmutY::mutY = 0.2734
RvDmutY::mutY	28000000	7.44716				190000000	8.27875				46000000000	10.6628				11.415	11.415
RvDmutY::mutY	20000000	7.30103				270000000	8.43136				52000000000	10.716				11.3802	11.3802
RvDmutY::mutY-R262Q	17000000	7.23045	7.31742	0.150638	Rv versus RvDmutY::mutY R262Q =0.4791	180000000	8.25527	8.35085	0.145678	Rv versus RvDmutY::mutY R262Q =0.9217	29000000000	10.4624	10.6165	0.136936	Rv versus RvDmutY::mutY R262Q = 0.9044	11.415	11.415	11.4006	0.138665	Rv versus RvDmutY::mutY R262Q =0.3883
RvDmutY::mutY-R262Q	17000000	7.23045				330000000	8.51851				46000000000	10.6628				11.5315	11.5315
RvDmutY::mutY-R262Q	31000000	7.49136				190000000	8.27875				53000000000	10.7243				11.2553	11.2553
Figure 4b: Isoniazid
	Day 0				ANOVA test	Day 3				ANOVA test	Day 6				ANOVA test	Day 9				ANOVA test
Strains			Average	SD
Rv	25000000	7.39794	7.39203	0.0881942		270000	5.43136	5.48335	0.0650524		34000	4.53148	4.43362	0.253167		1800	3.25527	3.37187	0.105995
Rv	30000000	7.47712				360000	5.5563				14000	4.14613				2500	3.39794
Rv	20000000	7.30103				290000	5.4624				42000	4.62325				2900	3.4624
RvDmutY	18000000	7.25527	7.40477	0.144668	Rv versus RvDmutY=0.9963	890000	5.94939	5.90884	0.0432484	Rv versus RvDmutY=0.0002	92000	4.96379	4.95353	0.0306389	Rv versus RvDmutY=0.0292	5200	3.716	3.71579	0.0167129	Rv versus RvDmutY=0.0019
RvDmutY	26000000	7.41497				730000	5.86332				83000	4.91908				5000	3.69897
RvDmutY	35000000	7.54407				820000	5.91381				95000	4.97772				5400	3.73239
RvDmutY::mutY	29000000	7.4624	7.40736	0.0509912	Rv versus RvDmutY::mutY = 0.9937	200000	5.30103	5.40705	0.10229	Rv versus RvDmutY::mutY = 0.4392	10000	4	4.24413	0.284324	Rv versus RvDmutY::mutY =0.5316	2000	3.30103	3.31548	0.0931075	Rv versus RvDmutY::mutY = 0.7272
RvDmutY::mutY	25000000	7.39794				260000	5.41497				15000	4.17609				2600	3.41497
RvDmutY::mutY	23000000	7.36173				320000	5.50515				36000	4.5563				1700	3.23045
RvDmutY::mutY-R262Q	32000000	7.50515	7.52068	0.053065	Rv versus RvDmutY::mutY R262Q =0.2762	660000	5.81954	5.76633	0.0518311	Rv versus RvDmutY::mutY R262Q =0.0027	63000	4.79934	4.7793	0.0897391	Rv versus RvDmutY::mutY R262Q =0.1455	5500	3.74036	3.75436	0.072181	Rv versus RvDmutY::mutY R262Q =0.001
RvDmutY::mutY-R262Q	38000000	7.57978				520000	5.716				48000	4.68124				4900	3.6902
RvDmutY::mutY-R262Q	30000000	7.47712				580000	5.76343				72000	4.85733				6800	3.83251
Figure 4c: Rifampicin
	Day 0				ANOVA test	Day 3				ANOVA test	Day 6				ANOVA test	Day 9				ANOVA test
Strains			Average	SD
Rv	20000000	7.30103	7.36259	0.148037		520000	5.716	5.6769	0.041438		4700	3.6721	3.52361	0.167252			2.17609	2.15904	0.151238
Rv	18000000	7.25527				430000	5.63347				3600	3.5563					2.30103
Rv	34000000	7.53148				480000	5.68124				2200	3.34242					2
RvDmutY	22000000	7.34242	7.32189	0.136695	Rv versus RvDmutY=0.9488	1000000	6	6.06984	0.0656673	Rv versus RvDmutY=0.0007	12500	4.09691	4.04318	0.0528645	Rv versus RvDmutY=0.0004		2.90309	2.93858	0.0350284	Rv versus RvDmutY=<0.0001
RvDmutY	15000000	7.17609				1200000	6.07918				11000	4.04139					2.93952
RvDmutY	28000000	7.44716				1350000	6.13033				9800	3.99123					2.97313
RvDmutY::mutY	33000000	7.51851	7.52438	0.096077	Rv versus RvDmutY::mutY = 0.2789	560000	5.74819	5.64315	0.116085	Rv versus RvDmutY::mutY = 0.909	4000	3.60206	3.59978	0.0546079	Rv versus RvDmutY::mutY = 0.6436		2.07918	2.21735	0.132109	Rv versus RvDmutY::mutY = 0.8307
RvDmutY::mutY	42000000	7.62325				460000	5.66276				3500	3.54407					2.34242
RvDmutY::mutY	27000000	7.43136				330000	5.51851				4500	3.65321					2.23045
RvDmutY::mutY-R262Q	30000000	7.47712	7.40583	0.0676948	Rv versus RvDmutY::mutY R262Q =0.9399	900000	5.95424	5.94597	0.0671529	Rv versus RvDmutY::mutY R262Q =0.0071	8700	3.93952	3.90946	0.0324483	Rv versus RvDmutY::mutY R262Q =0.0025		2.91908	2.95505	0.0324909	Rv versus RvDmutY::mutY R262Q =<0.0001
RvDmutY::mutY-R262Q	25000000	7.39794				1020000	6.0086				7500	3.87506					2.96379
RvDmutY::mutY-R262Q	22000000	7.34242				750000	5.87506				8200	3.91381					2.98227
Figure 4d: Ciprofloxacin
	Day 0				ANOVA test	Day 3				ANOVA test	Day 6				ANOVA test	Day 9				ANOVA test
Strains			Average	SD
Rv	32000000	7.50515	7.44925	0.0634981		100000	5	5.19096	0.174594		2000	3.30103	3.18543	0.162212		150	2.17609	2.04019	0.136505
Rv	24000000	7.38021				170000	5.23045				1800	3.25527				110	2.04139
Rv	29000000	7.4624				220000	5.34242				1000	3				80	1.90309
RvDmutY	34000000	7.53148	7.53689	0.0626447	Rv versus RvDmutY=0.362	620000	5.79239	5.86474	0.0763153	Rv versus RvDmutY=0.0004	12000	4.07918	4.08682	0.0306598	Rv versus RvDmutY=<0.0001	890	2.94939	2.95025	0.0316053	Rv versus RvDmutY=<0.0001
RvDmutY	40000000	7.60206				720000	5.85733				11500	4.0607				830	2.91908
RvDmutY	30000000	7.47712				880000	5.94448				13200	4.12057				960	2.98227
RvDmutY::mutY	26000000	7.41497	7.43935	0.0576136	Rv versus RvDmutY::mutY =0.9963	140000	5.14613	5.11027	0.141551	Rv versus RvDmutY::mutY = 0.7578	2300	3.36173	3.47288	0.10909	Rv versus RvDmutY::mutY = 0.0254	170	2.23045	2.22379	0.141391	Rv versus RvDmutY::mutY = 0.1341
RvDmutY::mutY	32000000	7.50515				90000	4.95424				3800	3.57978				230	2.36173
RvDmutY::mutY	25000000	7.39794				170000	5.23045				3000	3.47712				120	2.07918
RvDmutY::mutY-R262Q	34000000	7.53148	7.44543	0.095663	Rv versus RvDmutY::mutY R262Q =0.9999	550000	5.74036	5.75418	0.0466496	Rv versus RvDmutY::mutY R262Q =0.0012	9300	3.96848	3.88987	0.0723503	Rv versus RvDmutY::mutY R262Q =0.0001	590	2.77085	2.81388	0.0405008	Rv versus RvDmutY::mutY R262Q =<0.0001
RvDmutY::mutY-R262Q	29000000	7.4624				640000	5.80618				7500	3.87506				660	2.81954
RvDmutY::mutY-R262Q	22000000	7.34242				520000	5.716				6700	3.82607				710	2.85126
Figure 4e: Ethambutol
	Day 0				ANOVA test	Day 3				ANOVA test	Day 6				ANOVA test	Day 9				ANOVA test
Strains			Average	SD
Rv	32000000	7.50515	7.40253	0.130781		180000	5.25527	5.31981	0.0567165		12000	4.07918	4.23822	0.151238		1200	3.07918	3.10321	0.117088
Rv	28000000	7.44716				230000	5.36173				24000	4.38021				1000	3
Rv	18000000	7.25527				220000	5.34242				18000	4.25527				1700	3.23045
RvDmutY	26000000	7.41497	7.51891	0.104139	Rv versus RvDmutY=0.5918	340000	5.53148	5.53098	0.150516	Rv versus RvDmutY=0.5184	34000	4.53148	4.31879	0.19577	Rv versus RvDmutY=0.8401	2500	3.39794	3.31808	0.0728461	Rv versus RvDmutY=0.0564
RvDmutY	33000000	7.51851				480000	5.68124				14000	4.14613				2000	3.30103
RvDmutY	42000000	7.62325				240000	5.38021				19000	4.27875				1800	3.25527
RvDmutY::mutY	18000000	7.25527	7.38246	0.114443	Rv versus RvDmutY::mutY = 0.995	370000	5.5682	5.41157	0.187287	Rv versus RvDmutY::mutY = 0.9236	29000	4.4624	4.32252	0.130473	Rv versus RvDmutY::mutY = 0.8229	1100	3.04139	3.11048	0.0674162	Rv versus RvDmutY::mutY = 0.9993
RvDmutY::mutY	26000000	7.41497				290000	5.4624				16000	4.20412				1300	3.11394
RvDmutY::mutY	30000000	7.47712				160000	5.20412				20000	4.30103				1500	3.17609
RvDmutY::mutY-R262Q	25000000	7.39794	7.35973	0.167825	Rv versus RvDmutY::mutY R262Q =0.9576	100000	5	5.28994	0.295691	Rv versus RvDmutY::mutY R262Q =0.9969	27000	4.43136	4.39826	0.0856248	Rv versus RvDmutY::mutY R262Q =0.4429	1400	3.14613	3.2461	0.108649	Rv versus RvDmutY::mutY R262Q =0.2227
RvDmutY::mutY-R262Q	32000000	7.50515				190000	5.27875				29000	4.4624				2300	3.36173
RvDmutY::mutY-R262Q	15000000	7.17609				390000	5.59106				20000	4.30103				1700	3.23045
