# Supplementary material for: GWAS and functional studies suggest a role for altered DNA repair in the evolution of drug resistance in Mycobacterium tuberculosis
Source: eLife. 2023 Jan 25;12:e75860. doi: 10.7554/eLife.75860 (PMC9876569; doi:10.7554/eLife.75860)
Supplement: Figure 5—figure supplement 1—source data 1. [file elife-75860-fig5-figsupp1-data1.xlsx]

## Sheet: Sheet1
	Figure 5-Figure Supplement 1a & b
		4 hpi			96 hpi			Percent survival w.r.t 4 hpi
	Strains	CFU/ml	Average	SD	CFU/ml
	Rv	600000	543333	51316	62000	52000	9165.15	1.03333	0.952243	0.0770486
	Rv	530000			50000			0.943396
	Rv	500000			44000			0.88
	RvDmutY	570000	513333	49328.8	48000	52666.7	4509.25	0.842105	1.03651	0.170935
	RvDmutY	480000			53000			1.10417
	RvDmutY	490000			57000			1.16327
	RvDmutY::mutY	610000	540000	81853.5	57000	47666.7	8326.66	0.934426	0.883036	0.0697989
	RvDmutY::mutY	560000			45000			0.803571
	RvDmutY::mutY	450000			41000			0.911111
	RvDmutY::mutY-R262Q	430000	533333	90737.7	44000	46333.3	2081.67	1.02326	0.882898	0.125055
	RvDmutY::mutY-R262Q	600000			47000			0.783333
	RvDmutY::mutY-R262Q	570000			48000			0.842105
	Figure 5-Figure Supplement 1c&d
		4 hpi										96 hpi
	Strains	Rv	RvDmutY	Total=Rv+RvDmutY	Percent survival-Rv	Average	SD	Percent survival-RvDmutY	Average	SD	T-test	Rv	RvDmutY	Total=Rv+RvDmutY	Percent survival-Rv	Average	SD	Percent survival-RvDmutY	Average	SD	T-test
	Rv+RvDmutY	38	45	83	45.7831	50.0759	8.62058	54.2169	49.9241	8.62058	ns	35	40	75	46.6667	50.1832	3.34839	53.3333	49.8168	3.34839	ns
	Rv+RvDmutY	45	30	75	60			40				46	45	91	50.5495			49.4505
	Rv+RvDmutY	36	45	81	44.4444			55.5556				40	35	75	53.3333			46.6667
	Strains	Rv	RvDmutY::mutY	Total=Rv+RvDmutY	Percent survival-Rv	Average	SD	RvDmutY::mutY	Average	SD	T-test	Rv	RvDmutY::mutY	Total=Rv+RvDmutY	Percent survival-Rv	Average	SD	RvDmutY::mutY	Average	SD	T-test
	Rv+RvDmutY::mutY	37	30	67	55.2239	48.3936	7.03169	44.7761	51.6064	7.03169	ns	43	43	86	50	52.5664	6.33562	50	47.4336	6.33562	ns
	Rv+RvDmutY::mutY	40	42	82	48.7805			51.2195				46	50	96	47.9167			52.0833
	Rv+RvDmutY::mutY	35	50	85	41.1765			58.8235				55	37	92	59.7826			40.2174
	Strains	Rv	RvDmutY::mutY R262Q	Total=Rv+RvDmutY	Percent survival-Rv	Average	SD	RvDmutY::mutY R262Q	Average	SD	T-test	Rv	RvDmutY::mutY R262Q	Total=Rv+RvDmutY	Percent survival-Rv	Average	SD	RvDmutY::mutY R262Q	Average	SD	T-test
	Rv+RvDmutY::mutY R262Q	35	60	95	36.8421	48.9474	11.6148	63.1579	51.0526	11.6148	ns	47	50	97	48.4536	46.665	3.29971	51.5464	53.335	3.29971	ns
	Rv+RvDmutY::mutY R262Q	40	40	80	50			50				37	39	76	48.6842			51.3158
	Rv+RvDmutY::mutY R262Q	45	30	75	60			40				33	44	77	42.8571			57.1429
	Figure 5-Figure Supplement 1e
	Strains	4 hpi			96 hpi
	Rv+RvDmutY	2000000	1.98333e+06	125831	170000	195000	22912.9
	Rv+RvDmutY	1850000			215000
	Rv+RvDmutY	2100000			200000
	Rv+RvDmutY::mutY	2000000	2.03667e+06	100167	185000	201333	14153.9
	Rv+RvDmutY::mutY	1960000			210000
	Rv+RvDmutY::mutY	2150000			209000
	Rv+RvDmutY::mutY R262Q	1500000	1.57333e+06	296873	200000	204333	14011.9
	Rv+RvDmutY::mutY R262Q	1320000			220000
	Rv+RvDmutY::mutY R262Q	1900000			193000
	Figure 5-Figure Supplement 1f: Isoniazid
	Strains	4 hpi			96 hpi
	Rv+RvDmutY	1930000	1.90667e+06	106927	10000	10266.7	642.91
	Rv+RvDmutY	1790000			11000
	Rv+RvDmutY	2000000			9800
	Rv+RvDmutY::mutY	1880000	2.00667e+06	120554	8500	9766.67	1115.05
	Rv+RvDmutY::mutY	2020000			10200
	Rv+RvDmutY::mutY	2120000			10600
	Rv+RvDmutY::mutY R262Q	1550000	1.60667e+06	191398	11000	10566.7	1209.68
	Rv+RvDmutY::mutY R262Q	1450000			11500
	Rv+RvDmutY::mutY R262Q	1820000			9200
	Figure 5-Figure Supplement 1g: rifampicin
	Strains	4 hpi			96 hpi
	Rv+RvDmutY	1500000	1450000	132288	15000	12733.3	2003.33
	Rv+RvDmutY	1300000			11200
	Rv+RvDmutY	1550000			12000
	Rv+RvDmutY::mutY	1800000	1.82333e+06	87368.9	9000	10333.3	1527.53
	Rv+RvDmutY::mutY	1750000			10000
	Rv+RvDmutY::mutY	1920000			12000
	Rv+RvDmutY::mutY R262Q	1630000	1.75333e+06	115902	12000	13600	1509.97
	Rv+RvDmutY::mutY R262Q	1770000			13800
	Rv+RvDmutY::mutY R262Q	1860000			15000
	Figure 5-Figure Supplement 1h: ciprofloxacin
	Strains	4 hpi			96 hpi
	Rv+RvDmutY	1000000	950000	50000	9000	8833.33	763.763
	Rv+RvDmutY	900000			9500
	Rv+RvDmutY	950000			8000
	Rv+RvDmutY::mutY	1200000	1400000	180278	4800	5700	1228.82
	Rv+RvDmutY::mutY	1450000			7100
	Rv+RvDmutY::mutY	1550000			5200
	Rv+RvDmutY::mutY R262Q	1380000	1.46333e+06	76376.3	12000	10633.3	1517.67
	Rv+RvDmutY::mutY R262Q	1480000			10900
	Rv+RvDmutY::mutY R262Q	1530000			9000
