# Supplementary material for: GWAS and functional studies suggest a role for altered DNA repair in the evolution of drug resistance in Mycobacterium tuberculosis
Source: eLife. 2023 Jan 25;12:e75860. doi: 10.7554/eLife.75860 (PMC9876569; doi:10.7554/eLife.75860)
Supplement: Figure 5—source data 1. [file elife-75860-fig5-data1.xlsx]

## Sheet: Sheet1
	Figure 5b : No antibiotics
		CFU/ml
	Strains	4 hpi	Average	SD	ANOVA test	96 hpi	Average	SD	ANOVA test
	Rv	340000	5.51049	0.103666		15000	4.27053	0.102911
	Rv	250000				18000
	Rv	400000				24000
	RvDmutY	270000	5.42957	0.127646	Rv versus RvDmutY=0.6269	35000	4.60912	0.0688588	Rv versus RvDmutY=0.003
	RvDmutY	360000				48000
	RvDmutY	200000				40000
	RvDmutY::mutY	270000	5.51049	0.0880471	Rv versus RvDmutY::mutY = >0.9999	20000	4.24413	0.0632101	Rv versus RvDmutY::mutY = 0.9619
	RvDmutY::mutY	180000				15000
	RvDmutY::mutY	220000				18000
	RvDmutY::mutY-R262Q	280000	5.51049	0.0496172	Rv versus RvDmutY::mutY R262Q =>0.9999	37000	4.56127	0.0955959	Rv versus RvDmutY::mutY R262Q =0.0074
	RvDmutY::mutY-R262Q	240000				45000
	RvDmutY::mutY-R262Q	300000				29000
	Figure 5c : Isoniazid
		CFU/ml
	Strains	4 hpi	Average	SD	ANOVA test	96 hpi	Average	SD	ANOVA test
	Rv	330000	5.50617	0.102618		4200	3.67924	0.0513966
	Rv	250000				5300
	Rv	400000				4900
	RvDmutY	270000	5.42957	0.127646	Rv versus RvDmutY=0.6595	10000	3.886	0.100027	Rv versus RvDmutY=0.1052
	RvDmutY	360000				6500
	RvDmutY	200000				7000
	RvDmutY::mutY	270000	5.34302	0.0880471	Rv versus RvDmutY::mutY = 0.1638	2200	3.54622	0.177097	Rv versus RvDmutY::mutY = 0.3489
	RvDmutY::mutY	180000				4300
	RvDmutY::mutY	220000				4600
	RvDmutY::mutY-R262Q	280000	5.43483	0.0496172	Rv versus RvDmutY::mutY R262Q =0.7015	7500	3.8336	0.0365272	Rv versus RvDmutY::mutY R262Q =0.2509
	RvDmutY::mutY-R262Q	240000				6400
	RvDmutY::mutY-R262Q	300000				6600
	Figure 5d : rifampicin
		CFU/ml
	Strains	4 hpi	Average	SD	ANOVA test	96 hpi	Average	SD	ANOVA test
	Rv	180000	5.40253	0.130781		1000	3.18703	0.210489
	Rv	280000				2600
	Rv	320000				1400
	RvDmutY	220000	5.42698	0.0764921	Rv versus RvDmutY=0.9899	12400	4.13304	0.0449212	Rv versus RvDmutY=<0.0001
	RvDmutY	310000				13300
	RvDmutY	280000				15200
	RvDmutY::mutY	320000	5.39395	0.113251	Rv versus RvDmutY::mutY = 0.9995	1800	3.26054	0.11713	Rv versus RvDmutY::mutY = 0.8082
	RvDmutY::mutY	250000				1400
	RvDmutY::mutY	190000				2400
	RvDmutY::mutY-R262Q	260000	5.40057	0.163403	Rv versus RvDmutY::mutY R262Q =>0.9999	13600	4.15397	0.0213261	Rv versus RvDmutY::mutY R262Q =<0.0001
	RvDmutY::mutY-R262Q	360000				14200
	RvDmutY::mutY-R262Q	170000				15000
	Figure 5e: ciprofloxacin
		CFU/ml
	Strains	4 hpi	Average	SD	ANOVA test	96 hpi	Average	SD	ANOVA test
	Rv	420000	5.67626	0.0506975		1500	3.20567	0.143576
	Rv	530000				1200
	Rv	480000				2300
	RvDmutY	330000	5.57726	0.0575189	Rv versus RvDmutY=0.2144	14200	4.13585	0.0505021	Rv versus RvDmutY=<0.0001
	RvDmutY	380000				15000
	RvDmutY	430000				12000
	RvDmutY::mutY	520000	5.65661	0.0626959	Rv versus RvDmutY::mutY = 0.9641	2600	3.51251	0.0895657	Rv versus RvDmutY::mutY = 0.0075
	RvDmutY::mutY	390000				3400
	RvDmutY::mutY	460000				3900
	RvDmutY::mutY-R262Q	290000	5.55128	0.0817494	Rv versus RvDmutY::mutY R262Q =0.1044	14000	4.1212	0.0246151	Rv versus RvDmutY::mutY R262Q =<0.0001
	RvDmutY::mutY-R262Q	370000				13200
	RvDmutY::mutY-R262Q	420000				12500
	Figure 5f: Percent survival	With passage				With Isoniazid				With rifampicn				With ciprofloxacin
	Strains	Percent survival w.r.t 4 hpi	Average	SD	ANOVA test	Percent survival w.r.t 4 hpi	Average	SD	ANOVA Test	Percent survival w.r.t 4 hpi	Average	SD	ANOVA Test	Percent survival w.r.t 4 hpi	Average	SD	ANOVA Test
	Rv	4.41176	5.87059	1.39862		1.27273	1.53924	0.503517		0.555556	0.640542	0.25633		0.357143	0.354242	0.126401
	Rv	7.2				2.12				0.928571				0.226415
	Rv	6				1.225				0.4375				0.479167
	RvDmutY	12.963	15.4321	3.96025	Rv versus RvDmutY=0.014	3.7037	3.00309	1.04208	Rv versus RvDmutY=0.0923	5.63636	5.11842	0.72464	Rv versus RvDmutY=0.0087	4.30303	3.68037	0.790731	Rv versus RvDmutY=0.0005
	RvDmutY	13.3333				1.80556				4.29032				3.94737
	RvDmutY	20				3.5				5.42857				2.7907
	RvDmutY::mutY	7.40741	7.97419	0.496657	Rv versus RvDmutY::mutY = 0.7519	0.814815	1.76487	0.836154	Rv versus RvDmutY::mutY = 0.9627	0.5625	0.795219	0.405249	Rv versus RvDmutY::mutY = 0.9978	0.5	0.739874	0.208082	Rv versus RvDmutY::mutY = 0.7967
	RvDmutY::mutY	8.33333				2.38889				0.56				0.871795
	RvDmutY::mutY	8.18182				2.09091				1.26316				0.847826
	RvDmutY::mutY-R262Q	13.2143	13.877	4.57778	Rv versus RvDmutY::mutY R262Q =0.0338	2.67857	2.51508	0.272932	Rv versus RvDmutY::mutY R262Q =0.3001	5.23077	5.99958	2.52877	Rv versus RvDmutY::mutY R262Q =0.0031	4.82759	3.79045	0.945607	Rv versus RvDmutY::mutY R262Q =0.0004
	RvDmutY::mutY-R262Q	18.75				2.66667				3.94444				3.56757
	RvDmutY::mutY-R262Q	9.66667				2.2				8.82353				2.97619
