# Supplementary material for: GWAS and functional studies suggest a role for altered DNA repair in the evolution of drug resistance in Mycobacterium tuberculosis
Source: eLife. 2023 Jan 25;12:e75860. doi: 10.7554/eLife.75860 (PMC9876569; doi:10.7554/eLife.75860)
Supplement: Figure 7—source data 1. [file elife-75860-fig7-data1.xlsx]

## Sheet: Sheet1
	Figure 7b : No antibiotics
		4 hpi										96 hpi
	Strains	Rv (Kan)	RvDmutY(Hyg)	Total=Rv(Kan)+RvDmuty(hyg)	Percent survival-Rv (Kan)	Average	SD	Percent survival-RvDmutY(Hyg)	Average	SD	t test	Rv (Kan)	RvDmutY(Hyg)	Total=Rv(Kan)+RvDmutY(hyg)	Percent survival-Rv (Kan)	Average	SD	Percent survival-RvDmutY(Hyg)	Average	SD	t test
	Rv+RvDmutY	100	90	190	52.6316	50.1144	4.48704	47.3684	49.8856	4.48704	Rv versus RvDmutY=0.9532	11	160	171	6.43275	22.4528	13.8757	93.5673	77.5472	13.8757	Rv versus RvDmutY=0.0083
	Rv+RvDmutY	95	85	180	52.7778			47.2222				65	150	215	30.2326			69.7674
	Rv+RvDmutY	102	125	227	44.9339			55.0661				62	140	202	30.6931			69.3069
	Strains	Rv (Kan)	RvDmutY::mutY (Hyg)	Total=Rv(Kan)+RvDmutY::mutY (hyg)	Percent survival-Rv (Kan)	Average	SD	Percent survival-RvDmutY::mutY	Average	SD	t test	Rv (Kan)	RvDmutY::mutY (Hyg)	Total=Rv(Kan)+RvDmutY::mutY (hyg)	Percent survival-Rv (Kan)	Average	SD	Percent survival-RvDmutY::mutY	Average	SD	t test
	Rv+RvDmutY::mutY	118	85	203	58.1281	53.2355	4.43038	41.8719	46.7645	4.43038	Rv versus RvDmutY::mutY=0.1482	85	95	180	47.2222	47.9084	4.21775	52.7778	52.0916	4.48704	Rv versus RvDmutY::mutY=0.3046
	Rv+RvDmutY::mutY	100	92	192	52.0833			47.9167				108	98	206	52.4272			47.5728
	Rv+RvDmutY::mutY	98	100	198	49.4949			50.5051				93	118	211	44.0758			55.9242
	Strains	Rv (Kan)	RvDmutY::mutY R262Q (Hyg)	Total=Rv(Kan)+RvDmutY::mutY R262Q (hyg)	Percent survival-Rv (Kan)	Average	SD	Percent survival-RvDmutY::mutY R262Q	Average	SD	t test	Rv (Kan)	RvDmutY::mutY R262Q (Hyg)	Total=Rv(Kan)+RvDmutY::mutY R262Q (hyg)	Percent survival-Rv (Kan)	Average	SD	Percent survival-RvDmutY::mutY R262Q	Average	SD	t test
	Rv+RvDmutY::mutY R262Q	96	70	166	57.8313	48.8883	7.80157	42.1687	51.1117	7.80157	Rv versus RvDmutY::mutY R262=0.7446	59	146	205	28.7805	28.0431	7.70094	71.2195	71.9569	4.48704	Rv versus RvDmutY::mutY R262=0.0010
	Rv+RvDmutY::mutY R262Q	60	78	138	43.4783			56.5217				76	139	215	35.3488			64.6512
	Rv+RvDmutY::mutY R262Q	83	100	183	45.3552			54.6448				38	152	190	20			80
	Figure 7c: Isoniazid
		4 hpi										96 hpi
	Strains	Rv (Kan)	RvDmutY(Hyg)	Total=Rv(Kan)+RvDmuty(hyg)	Percent survival-Rv (Kan)	Average	SD	Percent survival-RvDmutY(Hyg)	Average	SD	t test	Rv (Kan)	RvDmutY(Hyg)	Total=Rv(Kan)+RvDmutY(hyg)	Percent survival-Rv (Kan)	Average	SD	Percent survival-RvDmutY(Hyg)	Average	SD	t test
	Rv+RvDmutY	95	90	185	51.3514	48.84	4.54829	48.6486	51.16	4.54829	Rv versus RvDmutY=0.5660	20	80	100	20	23.208	4.67457	80	76.792	4.67457	Rv versus RvDmutY=0.0001
	Rv+RvDmutY	98	92	190	51.5789			48.4211				32	80	112	28.5714			71.4286
	Rv+RvDmutY	85	110	195	43.5897			56.4103				20	75	95	21.0526			78.9474
	Strains	Rv (Kan)	RvDmutY::mutY (Hyg)	Total=Rv(Kan)+RvDmutY::mutY (hyg)	Percent survival-Rv (Kan)	Average	SD	Percent survival-RvDmutY::mutY	Average	SD	t test	Rv (Kan)	RvDmutY::mutY (Hyg)	Total=Rv(Kan)+RvDmutY::mutY (hyg)	Percent survival-Rv (Kan)	Average	SD	Percent survival-RvDmutY::mutY	Average	SD	t test
	Rv+RvDmutY::mutY	100	85	185	54.0541	51.8541	3.3326	45.9459	48.1459	3.3326	Rv versus RvDmutY::mutY=0.2446	38	44	82	46.3415	44.9432	1.84119	53.6585	55.0568	1.84119	Rv versus RvDmutY::mutY=0.0025
	Rv+RvDmutY::mutY	97	105	202	48.0198			51.9802				45	60	105	42.8571			57.1429
	Rv+RvDmutY::mutY	115	100	215	53.4884			46.5116				47	56	103	45.6311			54.3689
	Strains	Rv (Kan)	RvDmutY::mutY R262Q (Hyg)	Total=Rv(Kan)+RvDmutY::mutY R262Q (hyg)	Percent survival-Rv (Kan)	Average	SD	Percent survival-RvDmutY::mutY R262Q	Average	SD	t test	Rv (Kan)	RvDmutY::mutY R262Q (Hyg)	Total=Rv(Kan)+RvDmutY::mutY R262Q (hyg)	Percent survival-Rv (Kan)	Average	SD	Percent survival-RvDmutY::mutY R262Q	Average	SD	t test
	Rv+RvDmutY::mutY R262Q	82	73	155	52.9032	47.7821	4.44934	47.0968	52.2179	4.44934	Rv versus RvDmutY::mutY R262=0.2891	33	82	115	28.6957	28.0474	2.26209	71.3043	71.9526	2.26209	Rv versus RvDmutY::mutY R262=0.0001
	Rv+RvDmutY::mutY R262Q	67	80	147	45.5782			54.4218				35	82	117	29.9145			70.0855
	Rv+RvDmutY::mutY R262Q	83	102	185	44.8649			55.1351				24	70	94	25.5319			74.4681
	Figure 7d: rifampicin
		4 hpi										96 hpi
	Strains	Rv (Kan)	RvDmutY(Hyg)	Total=Rv(Kan)+RvDMuty(hyg)	Percent survival-Rv (Kan)	Average	SD	Percent survival-RvDmutY(Hyg)	Average	SD	t test	Rv (Kan)	RvDmutY(Hyg)	Total=Rv(Kan)+RvDmutY(hyg)	Percent survival-Rv (Kan)	Average	SD	Percent survival-RvDmutY(Hyg)	Average	SD	t test
	Rv+RvDmutY	57	90	147	38.7755	50.2791	10.0725	61.2245	49.7209	10.0725	Rv versus RvDMutY=0.9491	28	120	148	18.9189	20.4405	3.43157	81.0811	79.5595	3.43157	Rv versus RvDmutY=0.0001
	Rv+RvDmutY	72	60	132	54.5455			45.4545				29	90	119	24.3697			75.6303
	Rv+RvDmutY	88	65	153	57.5163			42.4837				22	100	122	18.0328			81.9672
	Strains	Rv (Kan)	RvDmutY::mutY (Hyg)	Total=Rv(Kan)+RvDmutY::mutY (hyg)	Percent survival-Rv (Kan)	Average	SD	Percent survival-RvDmutY::mutY	Average	SD	t test	Rv (Kan)	RvDmutY::mutY (Hyg)	Total=Rv(Kan)+RvDmutY::mutY (hyg)	Percent survival-Rv (Kan)	Average	SD	Percent survival-RvDmutY::mutY	Average	SD	t test
	Rv+RvDmutY::mutY	86	95	181	47.5138	49.1512	2.4953	52.4862	50.8488	2.4953	Rv versus RvDMutY::mutY=0.4516	43	40	83	51.8072	45.166	6.51948	48.1928	54.834	6.51948	Rv versus RvDmutY::mutY=0.1435
	Rv+RvDmutY::mutY	90	83	173	52.0231			47.9769				38	60	98	38.7755			61.2245
	Rv+RvDmutY::mutY	92	100	192	47.9167			52.0833				53	65	118	44.9153			55.0847
	Strains	Rv (Kan)	RvDmutY::mutY R262Q (Hyg)	Total=Rv(Kan)+RvDmutY::mutY R262Q (hyg)	Percent survival-Rv (Kan)	Average	SD	Percent survival-RvDmutY::mutY R262Q	Average	SD	t test	Rv (Kan)	RvDmutY::mutY R262Q (Hyg)	Total=Rv(Kan)+RvDmutY::mutY R262Q (hyg)	Percent survival-Rv (Kan)	Average	SD	Percent survival-RvDmutY::mutY R262Q	Average	SD	t test
	Rv+RvDmutY::mutY R262Q	75	90	165	45.4545	52.5077	9.71109	54.5455	48.8391	10.7704	Rv versus RvDMutY::mutY R262=0.6839	12	110	122	9.83607	13.1354	3.76798	90.1639	86.8646	3.76798	Rv versus RvDmutY::mutY R262=0.0001
	Rv+RvDmutY::mutY R262Q	110	63	173	63.5838			36.4162				25	120	145	17.2414			82.7586
	Rv+RvDmutY::mutY R262Q	80	100	180	48.4848			55.5556				18	128	146	12.3288			87.6712
	Figure 7e: Ciprofloxacin	4 hpi										96 hpi
	Strains	Rv (Kan)	RvDmutY(Hyg)	Total=Rv(Kan)+RvDMuty(hyg)	Percent survival-Rv (Kan)	Average	SD	Percent survival-RvDmutY(Hyg)	Average	SD	t test	Rv (Kan)	RvDmutY(Hyg)	Total=Rv(Kan)+RvDmutY(hyg)	Percent survival-Rv (Kan)	Average	SD	Percent survival-RvDMutY(Hyg)	Average	SD	t test
	Rv+RvDmutY	45	52	97	46.3918	47.4264	7.77814	53.6082	52.5736	7.77814	Rv versus RvDMutY=0.4631	13	78	91	14.2857	11.2362	3.38441	85.7143	88.7638	3.38441	Rv versus RvDmutY= 0.0001
	Rv+RvDmutY	37	55	92	40.2174			59.7826				11	82	93	11.828			88.172
	Rv+RvDmutY	54	43	97	55.6701			44.3299				6	73	79	7.59494			92.4051
	Strains	Rv (Kan)	RvDmutY::mutY (Hyg)	Total=Rv(Kan)+RvDmutY::mutY (hyg)	Percent survival-Rv (Kan)	Average	SD	Percent survival-RvDmutY::mutY	Average	SD	t test	Rv (Kan)	RvDmutY::mutY (Hyg)	Total=Rv(Kan)+RvDmutY::mutY (hyg)	Percent survival-Rv (Kan)	Average	SD	Percent survival-RvDmutY::mutY	Average	SD	t test
	Rv+RvDmutY::mutY	58	65	123	47.1545	48.6431	4.73864	52.8455	51.3569	4.73864	Rv versus RvDMutY::mutY=0.5217	20	30	50	40	47.5751	7.78569	60	52.4249	7.78569	Rv versus RvDmutY::mutY=0.4880
	Rv+RvDmutY::mutY	65	80	145	44.8276			55.1724				40	32	72	55.5556			44.4444
	Rv+RvDmutY::mutY	82	70	152	53.9474			46.0526				25	28	53	47.1698			52.8302
	Strains	Rv (Kan)	RvDmutY::mutY R262Q (Hyg)	Total=Rv(Kan)+RvDmutY::mutY R262Q (hyg)	Percent survival-Rv (Kan)	Average	SD	Percent survival-RvDmutY::mutY R262Q	Average	SD	t test	Rv (Kan)	RvDmutY::mutY R262Q (Hyg)	Total=Rv(Kan)+RvDmutY::mutY R262Q (hyg)	Percent survival-Rv (Kan)	Average	SD	Percent survival-RvDmutY::mutY R262Q	Average	SD	t test
	Rv+RvDmutY::mutY R262Q	74	65	139	53.2374	59.968	6.71469	46.7626	40.032	6.71469	Rv versus RvDMutY::mutY R262=0.020	26	95	121	21.4876	19.4245	2.0291	78.5124	80.5755	2.0291	Rv versus RvDmutY::mutY R262=0.0001
	Rv+RvDmutY::mutY R262Q	100	50	150	66.6667			33.3333				19	90	109	17.4312			82.5688
	Rv+RvDmutY::mutY R262Q	90	60	150	60			40				18	75	93	19.3548			80.6452
