# Supplementary material for: GWAS and functional studies suggest a role for altered DNA repair in the evolution of drug resistance in Mycobacterium tuberculosis
Source: eLife. 2023 Jan 25;12:e75860. doi: 10.7554/eLife.75860 (PMC9876569; doi:10.7554/eLife.75860)
Supplement: Figure 8—source data 3. [file elife-75860-fig8-data3.xlsx]

## Sheet: Sheet1
	Figure 8c	Day 1- lungs
	Strains	CFU whole lung
	Rv	90
	Rv	115
	Rv	75
	RvDmutY	105
	RvDmutY	90
	RvDmutY	80
	RvDmutY::mutY	105
	RvDmutY::mutY	90
	RvDmutY::mutY	85
	RvDmutY::mutY-R262Q	125
	RvDmutY::mutY-R262Q	95
	RvDmutY::mutY-R262Q	90
	Figure 8c	Day 56 Lungs		Day 56 Spleen
	Strains	CFU/ml	ANOVA test	CFU/ml	ANOVA test
	Rv	25000		3500
	Rv	60000		2000
	Rv	50000		2700
	Rv	40000		4000
	Rv	10000		5000
	Rv	20000		1500
	Rv	34000		2900
	RvDmutY	85000	Rv versus RvDmutY=0.0003	8300	Rv versus RvDmutY=0.0079
	RvDmutY	70000		9400
	RvDmutY	60000		4300
	RvDmutY	135000		5900
	RvDmutY	78000		4500
	RvDmutY	120000		8500
	RvDmutY	150000		6200
	RvDmutY::mutY	20000	Rv versus RvDmutY::mutY=0.5002	1000	Rv versus RvDmutY=0.9991
	RvDmutY::mutY	59000		2200
	RvDmutY::mutY	86000		3500
	RvDmutY::mutY	43000		1800
	RvDmutY::mutY	25000		3000
	RvDmutY::mutY	50000		5500
	RvDmutY::mutY	30000		6000
	RvDmutY::mutY-R262Q	69000	Rv versus RvDmutY::mutY R262Q=0.0032	2500	Rv versus RvDmutY=0.0381
	RvDmutY::mutY-R262Q	87000		8200
	RvDmutY::mutY-R262Q	45000		4600
	RvDmutY::mutY-R262Q	85000		5800
	RvDmutY::mutY-R262Q	93000		7900
	RvDmutY::mutY-R262Q	53000		5200
	RvDmutY::mutY-R262Q	110000		6500
	Figure 8f	Day 1- lungs
	Strains	CFU whole lung
	Rv+RvDmutY	75
	Rv+RvDmutY	110
	Rv+RvDmutY	90
	Rv+RvDmutY::mutY	115
	Rv+RvDmutY::mutY	95
	Rv+RvDmutY::mutY	110
	Rv+RvDmutY::mutY R262Q	95
	Rv+RvDmutY::mutY R262Q	125
	Rv+RvDmutY::mutY R262Q	80
	Figureff	Day 56 Lungs		Day 56 Spleen
	Strains	CFU/ml	ANOVA test	CFU/ml	ANOVA test
	Rv+RvDmutY	60000		4200
	Rv+RvDmutY	40000		2500
	Rv+RvDmutY	100000		9000
	Rv+RvDmutY	20000		5200
	Rv+RvDmutY	53000		6600
	Rv+RvDmutY	45000		5800
	Rv+RvDmutY	82000	Rv+RvDmutY versus Rv+RvDmutY::mutY=ns	8000	Rv+RvDmutY versus Rv+RvDmutY::mutY=ns
	Rv+RvDmutY::mutY	38000		8400
	Rv+RvDmutY::mutY	42000		4800
	Rv+RvDmutY::mutY	50000		3600
	Rv+RvDmutY::mutY	40000		5800
	Rv+RvDmutY::mutY	44000		2000
	Rv+RvDmutY::mutY	36000		2500
	Rv+RvDmutY::mutY	48000	Rv+RvDmutY versus Rv+RvDmutY::mutY R262Q=ns	7600	Rv+RvDmutY versus Rv+RvDmutY::mutY=ns
	Rv+RvDmutY::mutY R262Q	20000		7000
	Rv+RvDmutY::mutY R262Q	50000		5500
	Rv+RvDmutY::mutY R262Q	45000		5200
	Rv+RvDmutY::mutY R262Q	70000		3500
	Rv+RvDmutY::mutY R262Q	98000		4400
	Rv+RvDmutY::mutY R262Q	60000		8600
	Rv+RvDmutY::mutY R262Q	80000		6500
	Figure8g	Day 56 Lungs (CFU/ml)			Day 56 Spleen (CFU/ml)
	Strains	Rv	RvDmutY	t test	Rv	RvDmutY	t test
	Rv+RvDmutY	18000	42000	Rv versus RvDMutY= 0.0087	1000	3200	Rv versus RvDmutY= 0.0060
	Rv+RvDmutY	10000	30000		600	1900
	Rv+RvDmutY	30000	70000		2500	6500
	Rv+RvDmutY	8000	12000		1500	3700
	Rv+RvDmutY	15000	38000		2600	4000
	Rv+RvDmutY	12000	33000		2000	3800
	Rv+RvDmutY	20000	62000		3000	5000
	Strains	Rv	RvDmutY::mutY	t test	Rv	RvDmutY::mutY	t test
	Rv+RvDmutY::mutY	25000	13000	Rv versus RvDmutY::mutY= 0.8748	4500	3900	Rv versus RvDmutY::mutY= 0.6431
	Rv+RvDmutY::mutY	15000	27000		3000	1800
	Rv+RvDmutY::mutY	35000	15000		2500	1100
	Rv+RvDmutY::mutY	18000	22000		2700	3100
	Rv+RvDmutY::mutY	25000	19000		800	1200
	Rv+RvDmutY::mutY	13000	23000		1500	1000
	Rv+RvDmutY::mutY	20000	28000		3500	4100
	Strains	Rv	RvDmutY::mutY R262Q	t test	Rv	RvDmutY::mutY R262Q	t test
	Rv+RvDmutY::mutY R262Q	4000	16000	Rv versus RvDmutY::mutY R262Q= 0.0046	2600	4400	Rv versus RvDmutY::mutY R262Q= 0.0017
	Rv+RvDmutY::mutY R262Q	15000	35000		1600	3900
	Rv+RvDmutY::mutY R262Q	20000	25000		2000	3200
	Rv+RvDmutY::mutY R262Q	10000	60000		1200	2300
	Rv+RvDmutY::mutY R262Q	18000	80000		1300	3100
	Rv+RvDmutY::mutY R262Q	20000	40000		2100	6500
	Rv+RvDmutY::mutY R262Q	15000	65000		1800	4700
	Figure 8h	Day 56 Lungs (CFU/ml)										Day 56 Lungs (CFU/ml)
	Strains	Rv	RvDmutY	Total=Rv+RvDmutY	Percent survival-Rv	Average	SD	Percent survival-RvDmutY	Average	SD	T-test	Rv	RvDmutY	Total=Rv+RvDmutY	Percent survival-Rv	Average	SD	Percent survival-RvDmutY	Average	SD	T-test
	Rv+RvDmutY	20000	42	62	29.0323	28.4705	3.84516	67.7419	69.6737	8.21366	Rv versus RvDmutY=0.0001	12	32	44	28.5714	32.9733	8.72695	72.7273	67.9341	6.9386	Rv versus RvDmutY=0.0001
	Rv+RvDmutY	12000	30	42	23.8095			71.4286				8	19	27	32			70.3704
	Rv+RvDmutY	28000	70	98	30.6122			71.4286				23	65	88	25.5556			73.8636
	Rv+RvDmutY	11000	12	23	34.7826			52.1739				12	37	49	23.0769			75.5102
	Rv+RvDmutY	12000	38	50	30			76				22	40	62	33.3333			64.5161
	Rv+RvDmutY	12000	33	45	26.6667			73.3333				28	38	66	48.2759			57.5758
	Rv+RvDmutY	20000	62	82	24.3902			75.6098				32	50	82	40			60.9756
	Strains	Rv	RvDmutY::mutY	Total=Rv+RvDmutY	Percent survival-Rv	Average	SD	RvDmutY::mutY	Average	SD	T-test	Rv	RvDmutY::mutY	Total=Rv+RvDmutY	Percent survival-Rv	Average	SD	RvDmutY::mutY	Average	SD	T-test
	Rv+RvDmutY::mutY	25000	13	38	65.7895	50.7254	16.953	34.2105	49.1956	12.1066	Rv versus RvDmutY=0.8492	48	39	87	57.1429	58.1523	9.50697	44.8276	44.0392	9.04165	Rv versus RvDmutY=0.0417
	Rv+RvDmutY::mutY	20000	27	47	31.9149			57.4468				32	18	50	66.6667			36
	Rv+RvDmutY::mutY	30000	15	45	77.7778			33.3333				22	11	33	61.1111			33.3333
	Rv+RvDmutY::mutY	18000	22	40	45			55				30	31	61	51.7241			50.8197
	Rv+RvDmutY::mutY	25000	19	44	56.8182			43.1818				11	12	23	55			52.1739
	Rv+RvDmutY::mutY	16000	23	39	33.3333			58.9744				18	10	28	72			35.7143
	Rv+RvDmutY::mutY	17000	28	45	44.4444			62.2222				33	41	74	43.4211			55.4054
	Strains	Rv	RvDmutY::mutY R262Q	Total=Rv+RvDmutY	Percent survival-Rv	Average	SD	RvDmutY::mutY R262Q	Average	SD	T-test	Rv	RvDmutY::mutY R262Q	Total=Rv+RvDmutY	Percent survival-Rv	Average	SD	RvDmutY::mutY R262Q	Average	SD	T-test
	Rv+RvDmutY::mutY R262Q	6000	16	22	18.1818	25.7141	12.6867	72.7273	72.9333	8.10295	Rv versus RvDmutY=0.0001	27	44	71	38.5714	31.9476	6.18356	61.9718	68.2495	5.59839	Rv versus RvDmutY=0.0001
	Rv+RvDmutY::mutY R262Q	18000	35	53	28.3019			66.0377				16	39	55	29.0909			70.9091
	Rv+RvDmutY::mutY R262Q	15000	25	40	50			62.5				22	32	54	42.3077			59.2593
	Rv+RvDmutY::mutY R262Q	12000	60	72	13.8889			83.3333				10	23	33	28.5714			69.697
	Rv+RvDmutY::mutY R262Q	20000	80	100	18			80				14	31	45	31.8182			68.8889
	Rv+RvDmutY::mutY R262Q	20000	40	60	33.3333			66.6667				22	65	87	25.5814			74.7126
	Rv+RvDmutY::mutY R262Q	17000	65	82	18.2927			79.2683				18	47	65	27.6923			72.3077
	Figure 8h	Day 1-Lungs (CFU/ml)
	Strains	Rv	RvDmutY	Total=Rv+RvDmutY	Percent survival-Rv	Average	SD	Percent survival-RvDmutY	Average	SD	T-test
	Rv+RvDmutY	5	10	15	33.3333	47.8865	14.5834	66.6667	52.1135	14.5834	Rv versus RvDmutY=ns
	Rv+RvDmutY	11	12	23	47.8261			52.1739
	Rv+RvDmutY	10	6	16	62.5			37.5
	Strains	Rv	RvDmutY::mutY	Total=Rv+RvDmutY	Percent survival-Rv	Average	SD	RvDmutY::mutY	Average	SD	T-test
	Rv+RvDmutY::mutY	11	11	22	50	50.7628	12.0319	50	49.2372	12.0319	Rv versus RvDmutY=ns
	Rv+RvDmutY::mutY	12	7	19	63.1579			36.8421
	Rv+RvDmutY::mutY	9	14	23	39.1304			60.8696
	Strains	Rv	RvDmutY::mutY R262Q	Total=Rv+RvDmutY	Percent survival-Rv	Average	SD	RvDmutY::mutY R262Q	Average	SD	T-test
	Rv+RvDmutY::mutY R262Q	12	9	21	57.1429	51.1874	6.99907	42.8571	48.8126	6.99907	Rv versus RvDmutY=ns
	Rv+RvDmutY::mutY R262Q	10	13	23	43.4783			56.5217
	Rv+RvDmutY::mutY R262Q	9	8	17	52.9412			47.0588
