# Supplementary material for: GWAS and functional studies suggest a role for altered DNA repair in the evolution of drug resistance in Mycobacterium tuberculosis
Source: eLife journal article supplement (doi:10.7554/elife.75860), 2023-01-16

Figure 8c- Raw Data

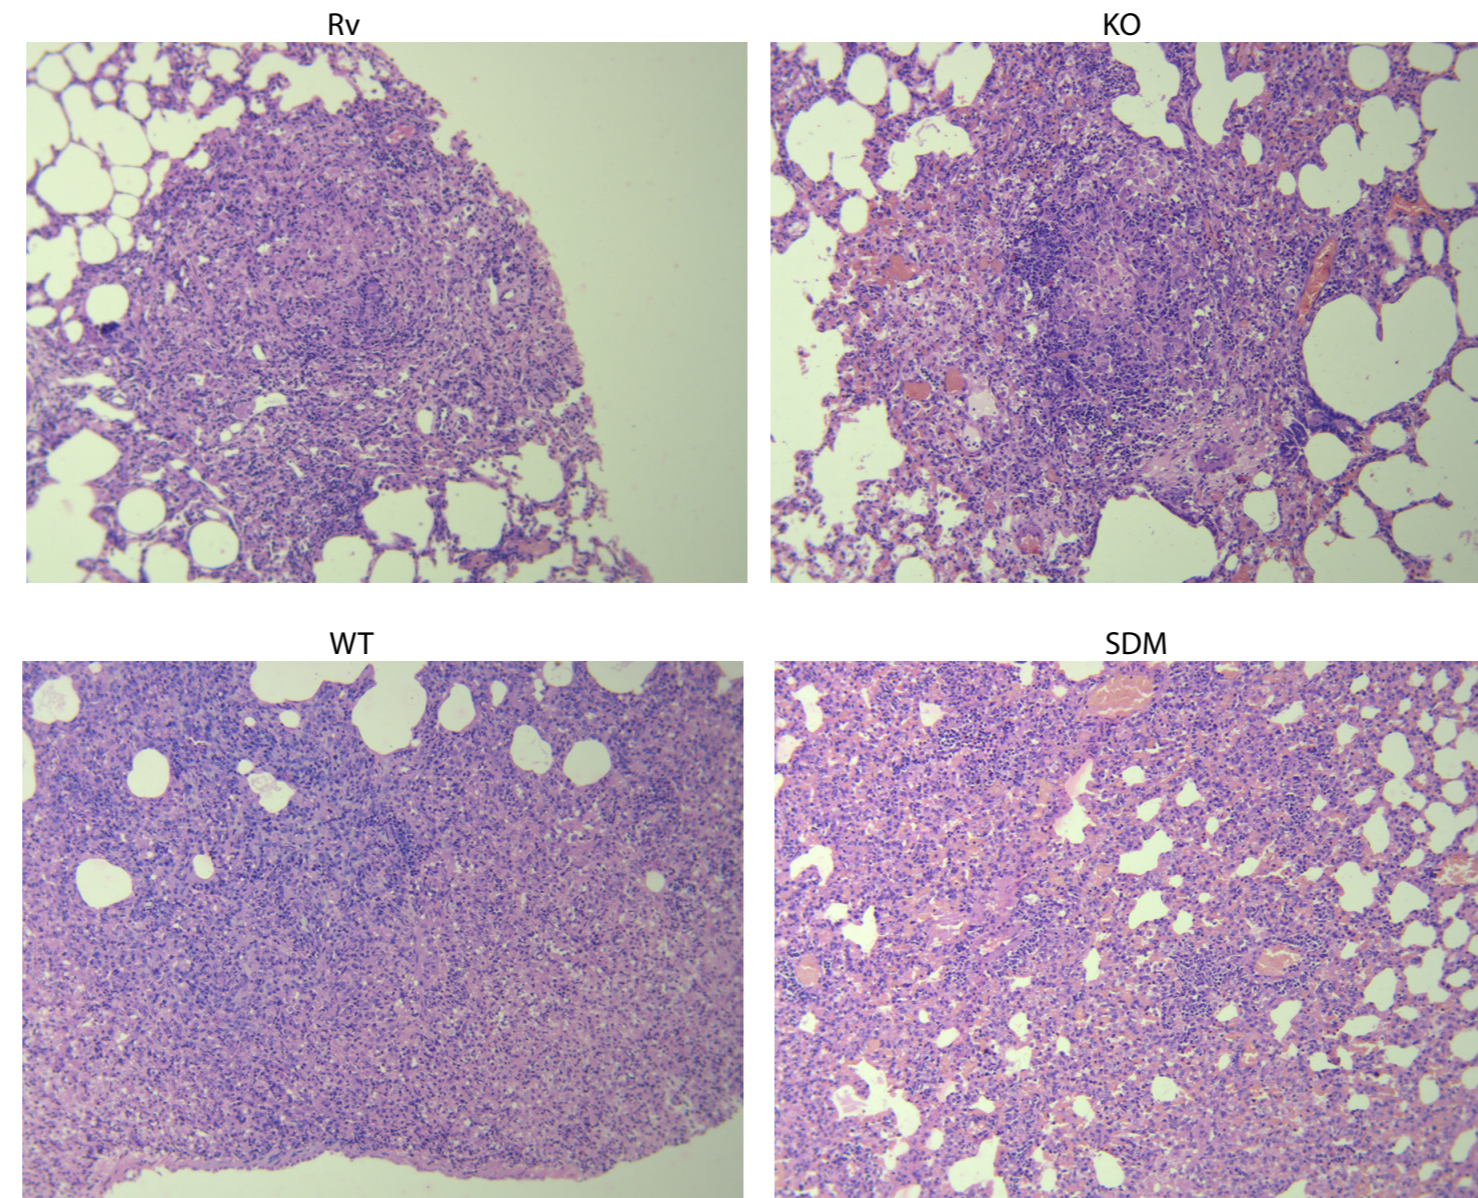

Supplement: supp [file elife-75860-supp-v1.zip]
