# Supplementary material for: GWAS and functional studies suggest a role for altered DNA repair in the evolution of drug resistance in Mycobacterium tuberculosis
Source: eLife. 2023 Jan 25;12:e75860. doi: 10.7554/eLife.75860 (PMC9876569; doi:10.7554/eLife.75860)
Supplement: Supplementary file 1. — The table contains the total number of clinical strains obtained from different studies. [file elife-75860-supp1.xlsx]

## Sheet: Sheet1
Supplementary File 1: Total number of clinical strains used in this study
Accession	Study	Country	Drug resistance Phenotype	Lineage
ERR023746	Bryant et al., 2013	Netherlands	monoDR	LIN-4
ERR023747	Bryant et al., 2013	Netherlands	monoDR	LIN-4
ERR023748	Bryant et al., 2013	Netherlands	monoDR	LIN-4
ERR024342	Bryant et al., 2013	Netherlands	monoDR	LIN-4
ERR024343	Bryant et al., 2013	Netherlands	monoDR	LIN-4
ERR024351	Bryant et al., 2013	Netherlands	MDR	LIN-2
ERR025426	Bryant et al., 2013	Netherlands	monoDR	LIN-4
ERR025429	Bryant et al., 2013	Netherlands	monoDR	LIN-4
ERR025430	Bryant et al., 2013	Netherlands	monoDR	LIN-4
ERR025431	Bryant et al., 2013	Netherlands	monoDR	LIN-4
ERR025439	Bryant et al., 2013	Netherlands	polyDR	LIN-2
ERR026476	Bryant et al., 2013	Netherlands	polyDR	LIN-4
ERR026477	Bryant et al., 2013	Netherlands	monoDR	LIN-2
ERR028608	Bryant et al., 2013	Netherlands	monoDR	LIN-4
ERR028609	Bryant et al., 2013	Estonia	polyDR	LIN-2
ERR028611	Bryant et al., 2013	Netherlands	monoDR	LIN-2
ERR028612	Bryant et al., 2013	Netherlands	monoDR	LIN-4
ERR028613	Bryant et al., 2013	Netherlands	monoDR	LIN-4
ERR029204	Bryant et al., 2013	Netherlands	polyDR	LIN-4
ERR029205	Bryant et al., 2013	Netherlands	monoDR	LIN-2
ERR036188	Guerra-Assuncao et al., 2014	Malawi	MDR	LIN-4
ERR036195	Guerra-Assuncao et al., 2014	Malawi	monoDR	LIN-3
ERR036203	Guerra-Assuncao et al., 2014	Malawi	monoDR	LIN-4
ERR036209	Guerra-Assuncao et al., 2014	Malawi	monoDR	LIN-3
ERR036226	Guerra-Assuncao et al., 2014	Malawi	monoDR	LIN-4
ERR036234	Guerra-Assuncao et al., 2014	Malawi	monoDR	LIN-4
ERR036249	Guerra-Assuncao et al., 2014	Malawi	polyDR	LIN-4
ERR037482	Guerra-Assuncao et al., 2014	Malawi	monoDR	LIN-3
ERR037486	Guerra-Assuncao et al., 2014	Malawi	MDR	LIN-4
ERR037488	Guerra-Assuncao et al., 2014	Malawi	monoDR	LIN-3
ERR037491	Guerra-Assuncao et al., 2014	Malawi	monoDR	LIN-1
ERR037518	Guerra-Assuncao et al., 2014	Malawi	monoDR	LIN-4
ERR037522	Guerra-Assuncao et al., 2014	Malawi	monoDR	LIN-4
ERR038260	Walker et al., 2013	UK	monoDR	LIN-3
ERR038261	Walker et al., 2013	UK	monoDR	LIN-3
ERR038262	Walker et al., 2013	UK	monoDR	LIN-3
ERR038263	Walker et al., 2013	UK	monoDR	LIN-3
ERR038280	Walker et al., 2013	UK	monoDR	LIN-3
ERR038738	Clark et al., 2013	Uganda	polyDR	LIN-4
ERR038741	Clark et al., 2013	Uganda	polyDR	LIN-4
ERR038742	Clark et al., 2013	Uganda	polyDR	LIN-4
ERR038743	Clark et al., 2013	Uganda	polyDR	LIN-3
ERR038749	Clark et al., 2013	Uganda	polyDR	LIN-4
ERR038751	Clark et al., 2013	Uganda	polyDR	LIN-4
ERR038755	Clark et al., 2013	Uganda	monoDR	LIN-4
ERR040118	Clark et al., 2013	Uganda	MDR	LIN-3
ERR040119	Clark et al., 2013	Uganda	polyDR	LIN-3
ERR040120	Clark et al., 2013	Uganda	MDR	LIN-4
ERR040121	Clark et al., 2013	Uganda	MDR	LIN-1
ERR040122	Clark et al., 2013	Uganda	MDR	LIN-4
ERR040124	Clark et al., 2013	Uganda	MDR	LIN-4
ERR040129	Clark et al., 2013	Uganda	MDR	LIN-3
ERR040132	Clark et al., 2013	Uganda	MDR	LIN-4
ERR040136	Clark et al., 2013	Uganda	MDR	LIN-3
ERR040137	Clark et al., 2013	Uganda	MDR	LIN-4
ERR040142	Clark et al., 2013	Uganda	polyDR	LIN-4
ERR046821	Walker et al., 2013	UK	MDR	LIN-4
ERR046825	Walker et al., 2013	UK	polyDR	LIN-4
ERR046834	Walker et al., 2013	UK	monoDR	LIN-4
ERR046855	Walker et al., 2013	UK	MDR	LIN-1
ERR046856	Walker et al., 2013	UK	MDR	LIN-1
ERR046933	Walker et al., 2013	UK	monoDR	LIN-5
ERR046943	Walker et al., 2013	UK	monoDR	LIN-4
ERR046981	Walker et al., 2013	UK	monoDR	LIN-4
ERR046982	Walker et al., 2013	UK	monoDR	LIN-3
ERR046983	Walker et al., 2013	UK	monoDR	LIN-3
ERR046986	Walker et al., 2013	UK	MDR	LIN-4
ERR047001	Walker et al., 2013	UK	monoDR	LIN-1
ERR047002	Walker et al., 2013	UK	monoDR	LIN-1
ERR067576	Casali et al., 2014	Russia	MDR	LIN-2
ERR067577	Casali et al., 2014	Russia	MDR	LIN-4
ERR067578	Casali et al., 2014	Russia	MDR	LIN-2
ERR067583	Casali et al., 2014	Russia	MDR	LIN-2
ERR067587	Casali et al., 2014	Russia	MDR	LIN-2
ERR067589	Casali et al., 2014	Russia	monoDR	LIN-2
ERR067596	Casali et al., 2014	Russia	polyDR	LIN-4
ERR067600	Casali et al., 2014	Russia	polyDR	LIN-2
ERR067602	Casali et al., 2014	Russia	monoDR	LIN-4
ERR067608	Casali et al., 2014	Russia	polyDR	LIN-2
ERR067609	Casali et al., 2014	Russia	MDR	LIN-4
ERR067610	Casali et al., 2014	Russia	polyDR	LIN-2
ERR067612	Casali et al., 2014	Russia	polyDR	LIN-4
ERR067613	Casali et al., 2014	Russia	MDR	LIN-2
ERR067620	Casali et al., 2014	Russia	MDR	LIN-2
ERR067621	Casali et al., 2014	Russia	MDR	LIN-2
ERR067622	Casali et al., 2014	Russia	MDR	LIN-2
ERR067623	Casali et al., 2014	Russia	MDR	LIN-2
ERR067627	Casali et al., 2014	Russia	MDR	LIN-2
ERR067628	Casali et al., 2014	Russia	preXDR	LIN-2
ERR067630	Casali et al., 2014	Russia	MDR	LIN-2
ERR067638	Casali et al., 2014	Russia	polyDR	LIN-2
ERR067643	Casali et al., 2014	Russia	MDR	LIN-2
ERR067645	Casali et al., 2014	Russia	MDR	LIN-4
ERR067649	Casali et al., 2014	Russia	MDR	LIN-2
ERR067650	Casali et al., 2014	Russia	MDR	LIN-2
ERR067651	Casali et al., 2014	Russia	MDR	LIN-2
ERR067652	Casali et al., 2014	Russia	MDR	LIN-2
ERR067654	Casali et al., 2014	Russia	MDR	LIN-2
ERR067656	Casali et al., 2014	Russia	MDR	LIN-2
ERR067657	Casali et al., 2014	Russia	MDR	LIN-4
ERR067660	Casali et al., 2014	Russia	MDR	LIN-2
ERR067661	Casali et al., 2014	Russia	polyDR	LIN-4
ERR067662	Casali et al., 2014	Russia	MDR	LIN-2
ERR067670	Casali et al., 2014	Russia	polyDR	LIN-4
ERR067673	Casali et al., 2014	Russia	MDR	LIN-2
ERR067677	Casali et al., 2014	Russia	MDR	LIN-4
ERR067678	Casali et al., 2014	Russia	monoDR	LIN-4
ERR067683	Casali et al., 2014	Russia	monoDR	LIN-4
ERR067685	Casali et al., 2014	Russia	monoDR	LIN-4
ERR067687	Casali et al., 2014	Russia	MDR	LIN-2
ERR067691	Casali et al., 2014	Russia	MDR	LIN-4
ERR067695	Casali et al., 2014	Russia	MDR	LIN-2
ERR067698	Casali et al., 2014	Russia	MDR	LIN-2
ERR067704	Casali et al., 2014	Russia	MDR	LIN-2
ERR067705	Casali et al., 2014	Russia	MDR	LIN-2
ERR067709	Casali et al., 2014	Russia	MDR	LIN-2
ERR067710	Casali et al., 2014	Russia	MDR	LIN-2
ERR067711	Casali et al., 2014	Russia	MDR	LIN-2
ERR067715	Casali et al., 2014	Russia	polyDR	LIN-2
ERR067720	Casali et al., 2014	Russia	MDR	LIN-2
ERR067721	Casali et al., 2014	Russia	MDR	LIN-2
ERR067735	Casali et al., 2014	Russia	MDR	LIN-4
ERR067739	Casali et al., 2014	Russia	MDR	LIN-2
ERR067741	Casali et al., 2014	Russia	MDR	LIN-2
ERR067742	Casali et al., 2014	Russia	MDR	LIN-2
ERR067754	Casali et al., 2014	Russia	MDR	LIN-2
ERR067759	Casali et al., 2014	Russia	polyDR	LIN-2
ERR067762	Casali et al., 2014	Russia	MDR	LIN-2
ERR067765	Casali et al., 2014	Russia	MDR	LIN-2
ERR072038	Walker et al., 2013	UK	monoDR	LIN-4
ERR108423	Casali et al., 2014	Russia	polyDR	LIN-2
ERR108429	Casali et al., 2014	Russia	monoDR	LIN-4
ERR108436	Casali et al., 2014	Russia	MDR	LIN-2
ERR108454	Casali et al., 2014	Russia	MDR	LIN-2
ERR108457	Casali et al., 2014	Russia	polyDR	LIN-4
ERR108458	Casali et al., 2014	Russia	MDR	LIN-2
ERR108464	Casali et al., 2014	Russia	polyDR	LIN-4
ERR108467	Casali et al., 2014	Russia	MDR	LIN-2
ERR108473	Casali et al., 2014	Russia	MDR	LIN-2
ERR108475	Casali et al., 2014	Russia	MDR	LIN-2
ERR108484	Casali et al., 2014	Russia	MDR	LIN-2
ERR108485	Casali et al., 2014	Russia	MDR	LIN-4
ERR108489	Casali et al., 2014	Russia	MDR	LIN-2
ERR108491	Casali et al., 2014	Russia	MDR	LIN-2
ERR108492	Casali et al., 2014	Russia	monoDR	LIN-2
ERR108493	Casali et al., 2014	Russia	MDR	LIN-2
ERR108502	Casali et al., 2014	Russia	MDR	LIN-2
ERR108503	Casali et al., 2014	Russia	MDR	LIN-2
ERR108505	Casali et al., 2014	Russia	monoDR	LIN-2
ERR108506	Casali et al., 2014	Russia	monoDR	LIN-2
ERR117460	Casali et al., 2014	Russia	MDR	LIN-2
ERR117466	Casali et al., 2014	Russia	MDR	LIN-4
ERR117468	Casali et al., 2014	Russia	MDR	LIN-2
ERR117469	Casali et al., 2014	Russia	polyDR	LIN-2
ERR117470	Casali et al., 2014	Russia	MDR	LIN-2
ERR126605	Guerra-Assuncao et al., 2014	Malawi	polyDR	LIN-1
ERR126633	Guerra-Assuncao et al., 2014	Malawi	monoDR	LIN-3
ERR133798	Casali et al., 2014	Russia	monoDR	LIN-2
ERR133799	Casali et al., 2014	Russia	polyDR	LIN-2
ERR133804	Casali et al., 2014	Russia	polyDR	LIN-4
ERR133806	Casali et al., 2014	Russia	MDR	LIN-2
ERR133809	Casali et al., 2014	Russia	polyDR	LIN-4
ERR133812	Casali et al., 2014	Russia	MDR	LIN-4
ERR133814	Casali et al., 2014	Russia	polyDR	LIN-2
ERR133815	Casali et al., 2014	Russia	polyDR	LIN-2
ERR133823	Casali et al., 2014	Russia	polyDR	LIN-4
ERR133826	Casali et al., 2014	Russia	MDR	LIN-2
ERR133827	Casali et al., 2014	Russia	MDR	LIN-2
ERR133831	Casali et al., 2014	Russia	MDR	LIN-2
ERR133834	Casali et al., 2014	Russia	MDR	LIN-4
ERR133835	Casali et al., 2014	Russia	monoDR	LIN-4
ERR133837	Casali et al., 2014	Russia	polyDR	LIN-2
ERR133838	Casali et al., 2014	Russia	polyDR	LIN-4
ERR133839	Casali et al., 2014	Russia	MDR	LIN-2
ERR133845	Casali et al., 2014	Russia	MDR	LIN-2
ERR133853	Casali et al., 2014	Russia	MDR	LIN-2
ERR133856	Casali et al., 2014	Russia	MDR	LIN-2
ERR133858	Casali et al., 2014	Russia	MDR	LIN-4
ERR133860	Casali et al., 2014	Russia	MDR	LIN-2
ERR133862	Casali et al., 2014	Russia	polyDR	LIN-2
ERR133863	Casali et al., 2014	Russia	monoDR	LIN-2
ERR133865	Casali et al., 2014	Russia	polyDR	LIN-2
ERR133866	Casali et al., 2014	Russia	MDR	LIN-2
ERR133868	Casali et al., 2014	Russia	MDR	LIN-2
ERR133882	Casali et al., 2014	Russia	monoDR	LIN-2
ERR133885	Casali et al., 2014	Russia	MDR	LIN-2
ERR133886	Casali et al., 2014	Russia	MDR	LIN-2
ERR133888	Casali et al., 2014	Russia	polyDR	LIN-2
ERR133889	Casali et al., 2014	Russia	MDR	LIN-2
ERR133894	Casali et al., 2014	Russia	polyDR	LIN-2
ERR133895	Casali et al., 2014	Russia	MDR	LIN-2
ERR133902	Casali et al., 2014	Russia	MDR	LIN-2
ERR133906	Casali et al., 2014	Russia	MDR	LIN-2
ERR133909	Casali et al., 2014	Russia	polyDR	LIN-4
ERR133911	Casali et al., 2014	Russia	polyDR	LIN-4
ERR133913	Casali et al., 2014	Russia	polyDR	LIN-2
ERR133914	Casali et al., 2014	Russia	polyDR	LIN-2
ERR133915	Casali et al., 2014	Russia	MDR	LIN-2
ERR133916	Casali et al., 2014	Russia	polyDR	LIN-2
ERR133917	Casali et al., 2014	Russia	polyDR	LIN-4
ERR133919	Casali et al., 2014	Russia	MDR	LIN-2
ERR133924	Casali et al., 2014	Russia	polyDR	LIN-2
ERR133930	Casali et al., 2014	Russia	MDR	LIN-2
ERR133931	Casali et al., 2014	Russia	MDR	LIN-2
ERR133933	Casali et al., 2014	Russia	MDR	LIN-2
ERR133943	Casali et al., 2014	Russia	monoDR	LIN-4
ERR133944	Casali et al., 2014	Russia	MDR	LIN-2
ERR133947	Casali et al., 2014	Russia	monoDR	LIN-2
ERR133953	Casali et al., 2014	Russia	MDR	LIN-2
ERR133955	Casali et al., 2014	Russia	polyDR	LIN-2
ERR133957	Casali et al., 2014	Russia	MDR	LIN-2
ERR133959	Casali et al., 2014	Russia	MDR	LIN-2
ERR133961	Casali et al., 2014	Russia	monoDR	LIN-4
ERR133963	Casali et al., 2014	Russia	polyDR	LIN-2
ERR133968	Casali et al., 2014	Russia	polyDR	LIN-2
ERR133969	Casali et al., 2014	Russia	polyDR	LIN-4
ERR133973	Casali et al., 2014	Russia	monoDR	LIN-2
ERR133975	Casali et al., 2014	Russia	polyDR	LIN-2
ERR133976	Casali et al., 2014	Russia	polyDR	LIN-2
ERR133977	Casali et al., 2014	Russia	monoDR	LIN-4
ERR133980	Casali et al., 2014	Russia	monoDR	LIN-4
ERR133981	Casali et al., 2014	Russia	MDR	LIN-4
ERR133985	Casali et al., 2014	Russia	polyDR	LIN-4
ERR133988	Casali et al., 2014	Russia	monoDR	LIN-2
ERR137193	Casali et al., 2014	Russia	monoDR	LIN-3
ERR137196	Casali et al., 2014	Russia	MDR	LIN-4
ERR137198	Casali et al., 2014	Russia	polyDR	LIN-2
ERR137201	Casali et al., 2014	Russia	monoDR	LIN-4
ERR137204	Casali et al., 2014	Russia	MDR	LIN-2
ERR137210	Casali et al., 2014	Russia	MDR	LIN-2
ERR137211	Casali et al., 2014	Russia	MDR	LIN-2
ERR137216	Casali et al., 2014	Russia	polyDR	LIN-2
ERR137220	Casali et al., 2014	Russia	MDR	LIN-2
ERR137221	Casali et al., 2014	Russia	polyDR	LIN-2
ERR137222	Casali et al., 2014	Russia	MDR	LIN-2
ERR137225	Casali et al., 2014	Russia	MDR	LIN-2
ERR137226	Casali et al., 2014	Russia	MDR	LIN-2
ERR137227	Casali et al., 2014	Russia	polyDR	LIN-2
ERR137228	Casali et al., 2014	Russia	polyDR	LIN-4
ERR137230	Casali et al., 2014	Russia	MDR	LIN-2
ERR137235	Casali et al., 2014	Russia	monoDR	LIN-2
ERR137237	Casali et al., 2014	Russia	MDR	LIN-2
ERR144615	Casali et al., 2014	Russia	MDR	LIN-2
ERR144619	Casali et al., 2014	Russia	MDR	LIN-2
ERR144624	Casali et al., 2014	Russia	MDR	LIN-2
ERR144628	Casali et al., 2014	Russia	MDR	LIN-2
ERR144632	Casali et al., 2014	Russia	MDR	LIN-2
ERR144633	Casali et al., 2014	Russia	MDR	LIN-2
ERR158569	Casali et al., 2014	Russia	monoDR	LIN-2
ERR158570	Casali et al., 2014	Russia	MDR	LIN-2
ERR158572	Casali et al., 2014	Russia	monoDR	LIN-2
ERR158573	Casali et al., 2014	Russia	monoDR	LIN-4
ERR158576	Casali et al., 2014	Russia	MDR	LIN-2
ERR158584	Casali et al., 2014	Russia	monoDR	LIN-4
ERR158586	Casali et al., 2014	Russia	MDR	LIN-2
ERR158589	Casali et al., 2014	Russia	polyDR	LIN-2
ERR158590	Casali et al., 2014	Russia	polyDR	LIN-2
ERR158591	Casali et al., 2014	Russia	monoDR	LIN-2
ERR158592	Casali et al., 2014	Russia	MDR	LIN-2
ERR158594	Casali et al., 2014	Russia	polyDR	LIN-2
ERR158595	Casali et al., 2014	Russia	MDR	LIN-4
ERR158597	Casali et al., 2014	Russia	MDR	LIN-2
ERR158611	Casali et al., 2014	Russia	MDR	LIN-2
ERR158613	Casali et al., 2014	Russia	MDR	LIN-2
ERR158614	Casali et al., 2014	Russia	polyDR	LIN-4
ERR158615	Casali et al., 2014	Russia	polyDR	LIN-2
ERR161012	Guerra-Assuncao et al., 2014	Malawi	monoDR	LIN-4
ERR161043	Guerra-Assuncao et al., 2014	Malawi	polyDR	LIN-4
ERR161053	Guerra-Assuncao et al., 2014	Malawi	monoDR	LIN-3
ERR161055	Guerra-Assuncao et al., 2014	Malawi	monoDR	LIN-4
ERR161060	Guerra-Assuncao et al., 2014	Malawi	monoDR	LIN-4
ERR161061	Guerra-Assuncao et al., 2014	Malawi	monoDR	LIN-3
ERR161072	Guerra-Assuncao et al., 2014	Malawi	monoDR	LIN-3
ERR161110	Guerra-Assuncao et al., 2014	Malawi	monoDR	LIN-4
ERR161113	Guerra-Assuncao et al., 2014	Malawi	monoDR	LIN-4
ERR161118	Guerra-Assuncao et al., 2014	Malawi	monoDR	LIN-3
ERR161138	Guerra-Assuncao et al., 2014	Malawi	monoDR	LIN-1
ERR161144	Guerra-Assuncao et al., 2014	Malawi	monoDR	LIN-1
ERR163945	Guerra-Assuncao et al., 2014	Malawi	monoDR	LIN-3
ERR163953	Guerra-Assuncao et al., 2014	Malawi	MDR	LIN-4
ERR163958	Guerra-Assuncao et al., 2014	Malawi	MDR	LIN-4
ERR163961	Guerra-Assuncao et al., 2014	Malawi	monoDR	LIN-3
ERR163962	Guerra-Assuncao et al., 2014	Malawi	polyDR	LIN-1
ERR163976	Guerra-Assuncao et al., 2014	Malawi	monoDR	LIN-3
ERR163984	Guerra-Assuncao et al., 2014	Malawi	monoDR	LIN-4
ERR163997	Guerra-Assuncao et al., 2014	Malawi	monoDR	LIN-4
ERR164001	Guerra-Assuncao et al., 2014	Malawi	polyDR	LIN-4
ERR176463	Guerra-Assuncao et al., 2014	Malawi	polyDR	LIN-4
ERR176468	Guerra-Assuncao et al., 2014	Malawi	monoDR	LIN-4
ERR176477	Guerra-Assuncao et al., 2014	Malawi	monoDR	LIN-4
ERR176501	Guerra-Assuncao et al., 2014	Malawi	monoDR	LIN-4
ERR176513	Guerra-Assuncao et al., 2014	Malawi	polyDR	LIN-4
ERR176523	Guerra-Assuncao et al., 2014	Malawi	monoDR	LIN-3
ERR176530	Guerra-Assuncao et al., 2014	Malawi	polyDR	LIN-4
ERR176543	Guerra-Assuncao et al., 2014	Malawi	monoDR	LIN-4
ERR176554	Guerra-Assuncao et al., 2014	Malawi	monoDR	LIN-4
ERR176555	Guerra-Assuncao et al., 2014	Malawi	monoDR	LIN-4
ERR176576	Guerra-Assuncao et al., 2014	Malawi	monoDR	LIN-3
ERR176605	Guerra-Assuncao et al., 2014	Malawi	polyDR	LIN-4
ERR176608	Guerra-Assuncao et al., 2014	Malawi	monoDR	LIN-4
ERR176629	Guerra-Assuncao et al., 2014	Malawi	MDR	LIN-4
ERR176646	Guerra-Assuncao et al., 2014	Malawi	monoDR	LIN-3
ERR176696	Guerra-Assuncao et al., 2014	Malawi	polyDR	LIN-4
ERR176716	Guerra-Assuncao et al., 2014	Malawi	monoDR	LIN-3
ERR176736	Guerra-Assuncao et al., 2014	Malawi	monoDR	LIN-4
ERR176752	Guerra-Assuncao et al., 2014	Malawi	polyDR	LIN-4
ERR176765	Guerra-Assuncao et al., 2014	Malawi	monoDR	LIN-4
ERR176809	Guerra-Assuncao et al., 2014	Malawi	polyDR	LIN-4
ERR176828	Guerra-Assuncao et al., 2014	Malawi	monoDR	LIN-4
ERR181316	Blouin et al., 2012	Djibouti	susceptible	LIN-2
ERR181440	Blouin et al., 2012	Djibouti	monoDR	LIN-2
ERR181680	Guerra-Assuncao et al., 2014	Malawi	monoDR	LIN-1
ERR181692	Guerra-Assuncao et al., 2014	Malawi	monoDR	LIN-3
ERR181710	Guerra-Assuncao et al., 2014	Malawi	monoDR	LIN-4
ERR181716	Guerra-Assuncao et al., 2014	Malawi	monoDR	LIN-4
ERR181727	Guerra-Assuncao et al., 2014	Malawi	monoDR	LIN-4
ERR181751	Guerra-Assuncao et al., 2014	Malawi	monoDR	LIN-3
ERR181762	Guerra-Assuncao et al., 2014	Malawi	polyDR	LIN-4
ERR181763	Guerra-Assuncao et al., 2014	Malawi	monoDR	LIN-3
ERR181766	Guerra-Assuncao et al., 2014	Malawi	monoDR	LIN-3
ERR181773	Guerra-Assuncao et al., 2014	Malawi	monoDR	LIN-3
ERR181793	Guerra-Assuncao et al., 2014	Malawi	polyDR	LIN-1
ERR181797	Guerra-Assuncao et al., 2014	Malawi	monoDR	LIN-3
ERR181806	Guerra-Assuncao et al., 2014	Malawi	monoDR	LIN-3
ERR181808	Guerra-Assuncao et al., 2014	Malawi	monoDR	LIN-3
ERR181815	Guerra-Assuncao et al., 2014	Malawi	monoDR	LIN-3
ERR181826	Guerra-Assuncao et al., 2014	Malawi	polyDR	LIN-4
ERR181852	Guerra-Assuncao et al., 2014	Malawi	monoDR	LIN-3
ERR181861	Guerra-Assuncao et al., 2014	Malawi	MDR	LIN-4
ERR181896	Guerra-Assuncao et al., 2014	Malawi	monoDR	LIN-4
ERR181897	Guerra-Assuncao et al., 2014	Malawi	monoDR	LIN-4
ERR181907	Guerra-Assuncao et al., 2014	Malawi	monoDR	LIN-1
ERR181909	Guerra-Assuncao et al., 2014	Malawi	monoDR	LIN-4
ERR181921	Guerra-Assuncao et al., 2014	Malawi	monoDR	LIN-4
ERR181930	Guerra-Assuncao et al., 2014	Malawi	polyDR	LIN-1
ERR181932	Guerra-Assuncao et al., 2014	Malawi	monoDR	LIN-4
ERR181933	Guerra-Assuncao et al., 2014	Malawi	polyDR	LIN-1
ERR181934	Guerra-Assuncao et al., 2014	Malawi	polyDR	LIN-4
ERR181942	Guerra-Assuncao et al., 2014	Malawi	monoDR	LIN-4
ERR181956	Guerra-Assuncao et al., 2014	Malawi	polyDR	LIN-4
ERR181986	Guerra-Assuncao et al., 2014	Malawi	MDR	LIN-4
ERR190347	Guerra-Assuncao et al., 2014	Malawi	monoDR	LIN-3
ERR190352	Guerra-Assuncao et al., 2014	Malawi	monoDR	LIN-4
ERR190355	Guerra-Assuncao et al., 2014	Malawi	monoDR	LIN-4
ERR190358	Guerra-Assuncao et al., 2014	Malawi	polyDR	LIN-4
ERR190359	Guerra-Assuncao et al., 2014	Malawi	monoDR	LIN-4
ERR190370	Guerra-Assuncao et al., 2014	Malawi	MDR	LIN-4
ERR190391	Guerra-Assuncao et al., 2014	Malawi	monoDR	LIN-3
ERR190393	Guerra-Assuncao et al., 2014	Malawi	polyDR	LIN-4
ERR211990	Guerra-Assuncao et al., 2014	Malawi	monoDR	LIN-4
ERR212006	Guerra-Assuncao et al., 2014	Malawi	monoDR	LIN-4
ERR212008	Guerra-Assuncao et al., 2014	Malawi	monoDR	LIN-4
ERR212017	Guerra-Assuncao et al., 2014	Malawi	monoDR	LIN-3
ERR212021	Guerra-Assuncao et al., 2014	Malawi	MDR	LIN-4
ERR212024	Guerra-Assuncao et al., 2014	Malawi	monoDR	LIN-3
ERR212054	Guerra-Assuncao et al., 2014	Malawi	polyDR	LIN-1
ERR212058	Guerra-Assuncao et al., 2014	Malawi	monoDR	LIN-3
ERR212078	Guerra-Assuncao et al., 2014	Malawi	polyDR	LIN-4
ERR212088	Guerra-Assuncao et al., 2014	Malawi	monoDR	LIN-1
ERR212105	Guerra-Assuncao et al., 2014	Malawi	monoDR	LIN-1
ERR212122	Guerra-Assuncao et al., 2014	Malawi	monoDR	LIN-4
ERR212127	Guerra-Assuncao et al., 2014	Malawi	monoDR	LIN-4
ERR212139	Guerra-Assuncao et al., 2014	Malawi	monoDR	LIN-3
ERR212146	Guerra-Assuncao et al., 2014	Malawi	monoDR	LIN-3
ERR212174	Guerra-Assuncao et al., 2014	Malawi	monoDR	LIN-4
ERR216906	Guerra-Assuncao et al., 2014	Malawi	monoDR	LIN-3
ERR216923	Guerra-Assuncao et al., 2014	Malawi	polyDR	LIN-4
ERR216939	Guerra-Assuncao et al., 2014	Malawi	monoDR	LIN-3
ERR221570	Guerra-Assuncao et al., 2014	Malawi	monoDR	LIN-1
ERR221595	Guerra-Assuncao et al., 2014	Malawi	monoDR	LIN-4
ERR221596	Guerra-Assuncao et al., 2014	Malawi	polyDR	LIN-1
ERR221616	Guerra-Assuncao et al., 2014	Malawi	MDR	LIN-4
ERR221617	Guerra-Assuncao et al., 2014	Malawi	MDR	LIN-4
ERR221618	Guerra-Assuncao et al., 2014	Malawi	MDR	LIN-4
ERR227978	Casali et al., 2014	Russia	MDR	LIN-2
ERR227980	Casali et al., 2014	Russia	polyDR	LIN-2
ERR227987	Casali et al., 2014	Russia	MDR	LIN-2
ERR227990	Casali et al., 2014	Russia	monoDR	LIN-4
ERR227994	Casali et al., 2014	Russia	monoDR	LIN-4
ERR227995	Casali et al., 2014	Russia	MDR	LIN-2
ERR227997	Casali et al., 2014	Russia	polyDR	LIN-4
ERR228003	Casali et al., 2014	Russia	MDR	LIN-2
ERR228009	Casali et al., 2014	Russia	MDR	LIN-4
ERR228013	Casali et al., 2014	Russia	MDR	LIN-2
ERR228014	Casali et al., 2014	Russia	polyDR	LIN-2
ERR228017	Casali et al., 2014	Russia	MDR	LIN-2
ERR228019	Casali et al., 2014	Russia	MDR	LIN-2
ERR228020	Casali et al., 2014	Russia	MDR	LIN-2
ERR228021	Casali et al., 2014	Russia	monoDR	LIN-4
ERR228025	Casali et al., 2014	Russia	MDR	LIN-4
ERR228026	Casali et al., 2014	Russia	monoDR	LIN-4
ERR228029	Casali et al., 2014	Russia	MDR	LIN-2
ERR228040	Casali et al., 2014	Russia	polyDR	LIN-2
ERR228043	Casali et al., 2014	Russia	MDR	LIN-2
ERR228044	Casali et al., 2014	Russia	polyDR	LIN-4
ERR228045	Casali et al., 2014	Russia	polyDR	LIN-4
ERR228046	Casali et al., 2014	Russia	MDR	LIN-2
ERR228048	Casali et al., 2014	Russia	polyDR	LIN-2
ERR228055	Casali et al., 2014	Russia	monoDR	LIN-4
ERR228058	Casali et al., 2014	Russia	polyDR	LIN-4
ERR228061	Casali et al., 2014	Russia	MDR	LIN-2
ERR228064	Casali et al., 2014	Russia	MDR	LIN-2
ERR228065	Casali et al., 2014	Russia	monoDR	LIN-4
ERR228066	Casali et al., 2014	Russia	polyDR	LIN-2
ERR229916	Casali et al., 2014	Russia	MDR	LIN-2
ERR229918	Casali et al., 2014	Russia	MDR	LIN-2
ERR229920	Casali et al., 2014	Russia	monoDR	LIN-2
ERR229921	Casali et al., 2014	Russia	MDR	LIN-2
ERR229922	Casali et al., 2014	Russia	MDR	LIN-2
ERR229923	Casali et al., 2014	Russia	MDR	LIN-2
SRR1723718	Hicks et.al.,2018	China	MDR	LIN-2
SRR1723720	Hicks et.al.,2018	China	monoDR	LIN-2
SRR1723726	Hicks et.al.,2018	China	monoDR	LIN-2
SRR1723728	Hicks et.al.,2018	China	MDR	LIN-2
SRR1723729	Hicks et.al.,2018	China	MDR	LIN-2
SRR1723730	Hicks et.al.,2018	China	MDR	LIN-2
SRR1723732	Hicks et.al.,2018	China	monoDR	LIN-2
SRR1723733	Hicks et.al.,2018	China	monoDR	LIN-2
SRR1723736	Hicks et.al.,2018	China	monoDR	LIN-2
SRR1723742	Hicks et.al.,2018	China	monoDR	LIN-2
SRR1723744	Hicks et.al.,2018	China	mDR	LIN-2
SRR1723747	Hicks et.al.,2018	China	MDR	LIN-2
SRR1723753	Hicks et.al.,2018	China	monoDR	LIN-2
SRR1723754	Hicks et.al.,2018	China	monoDR	LIN-2
SRR1723773	Hicks et.al.,2018	China	monoDR	LIN-2
SRR1723775	Hicks et.al.,2018	China	MDR	LIN-2
SRR1723782	Hicks et.al.,2018	China	monoDR	LIN-2
SRR1723793	Hicks et.al.,2018	China	MDR	LIN-2
SRR1723800	Hicks et.al.,2018	China	MDR	LIN-2
SRR1723807	Hicks et.al.,2018	China	MDR	LIN-2
SRR1723818	Hicks et.al.,2018	China	monoDR	LIN-2
SRR1723821	Hicks et.al.,2018	China	monoDR	LIN-2
SRR1723822	Hicks et.al.,2018	China	MDR	LIN-2
SRR1723824	Hicks et.al.,2018	China	monoDR	LIN-2
SRR1723825	Hicks et.al.,2018	China	monoDR	LIN-2
SRR1723831	Hicks et.al.,2018	China	monoDR	LIN-2
SRR1723834	Hicks et.al.,2018	China	MDR	LIN-2
SRR1723835	Hicks et.al.,2018	China	monoDR	LIN-2
SRR1723839	Hicks et.al.,2018	China	monoDR	LIN-2
SRR1723852	Hicks et.al.,2018	China	monoDR	LIN-2
SRR1723859	Hicks et.al.,2018	China	monoDR	LIN-2
SRR1723861	Hicks et.al.,2018	China	monoDR	LIN-2
SRR1723877	Hicks et.al.,2018	China	MDR	LIN-2
SRR1723879	Hicks et.al.,2018	China	monoDR	LIN-2
SRR1723883	Hicks et.al.,2018	China	monoDR	LIN-2
SRR1723885	Hicks et.al.,2018	China	MDR	LIN-2
SRR1723887	Hicks et.al.,2018	China	monoDR	LIN-2
SRR1723894	Hicks et.al.,2018	China	monoDR	LIN-4
SRR1723898	Hicks et.al.,2018	China	monoDR	LIN-4
SRR1723899	Hicks et.al.,2018	China	MDR	LIN-4
SRR1723902	Hicks et.al.,2018	China	monoDR	LIN-4
SRR1723906	Hicks et.al.,2018	China	MDR	LIN-4
SRR1723911	Hicks et.al.,2018	China	MDR	LIN-4
SRR1723913	Hicks et.al.,2018	China	monoDR	LIN-4
SRR1723917	Hicks et.al.,2018	China	MDR	LIN-4
SRR1723918	Hicks et.al.,2018	China	MDR	LIN-4
SRR1723922	Hicks et.al.,2018	China	MDR	LIN-4
SRR1723924	Hicks et.al.,2018	China	monoDR	LIN-4
SRR1723926	Hicks et.al.,2018	China	monoDR	LIN-4
SRR1723929	Hicks et.al.,2018	China	monoDR	LIN-4
SRR1723930	Hicks et.al.,2018	China	MDR	LIN-4
SRR1723935	Hicks et.al.,2018	China	MDR	LIN-4
SRR1723939	Hicks et.al.,2018	China	monoDR	LIN-4
SRR1723941	Hicks et.al.,2018	China	monoDR	LIN-4
SRR1723946	Hicks et.al.,2018	China	MDR	LIN-4
SRR1723949	Hicks et.al.,2018	China	monoDR	LIN-4
SRR1723951	Hicks et.al.,2018	China	monoDR	LIN-4
SRR1723954	Hicks et.al.,2018	China	monoDR	LIN-4
SRR1723957	Hicks et.al.,2018	China	MDR	LIN-4
SRR671719	Zhang et al., 2013	China	MDR	LIN-2
SRR671722	Zhang et al., 2013	China	MDR	LIN-2
SRR671723	Zhang et al., 2013	China	monoDR	LIN-2
SRR671725	Zhang et al., 2013	China	MDR	LIN-4
SRR671727	Zhang et al., 2013	China	MDR	LIN-2
SRR671728	Zhang et al., 2013	China	polyDR	LIN-2
SRR671732	Zhang et al., 2013	China	MDR	LIN-2
SRR671734	Zhang et al., 2013	China	MDR	LIN-2
SRR671735	Zhang et al., 2013	China	MDR	LIN-2
SRR671736	Zhang et al., 2013	China	MDR	LIN-2
SRR671737	Zhang et al., 2013	China	polyDR	LIN-2
SRR671743	Zhang et al., 2013	China	MDR	LIN-2
SRR671745	Zhang et al., 2013	China	MDR	LIN-2
SRR671746	Zhang et al., 2013	China	MDR	LIN-2
SRR671748	Zhang et al., 2013	China	MDR	LIN-2
SRR671749	Zhang et al., 2013	China	MDR	LIN-4
SRR671750	Zhang et al., 2013	China	polyDR	LIN-4
SRR671753	Zhang et al., 2013	China	MDR	LIN-2
SRR671754	Zhang et al., 2013	China	MDR	LIN-2
SRR671757	Zhang et al., 2013	China	polyDR	LIN-4
SRR671765	Zhang et al., 2013	China	MDR	LIN-2
SRR671766	Zhang et al., 2013	China	MDR	LIN-4
SRR671767	Zhang et al., 2013	China	monoDR	LIN-4
SRR671768	Zhang et al., 2013	China	MDR	LIN-4
SRR671780	Zhang et al., 2013	China	MDR	LIN-2
SRR671783	Zhang et al., 2013	China	polyDR	LIN-2
SRR671786	Zhang et al., 2013	China	monoDR	LIN-2
SRR671798	Zhang et al., 2013	China	MDR	LIN-2
SRR671829	Zhang et al., 2013	China	MDR	LIN-2
SRR671831	Zhang et al., 2013	China	MDR	LIN-4
SRR671834	Zhang et al., 2013	China	MDR	LIN-2
SRR671836	Zhang et al., 2013	China	monoDR	LIN-2
SRR671838	Zhang et al., 2013	China	MDR	LIN-4
SRR671840	Zhang et al., 2013	China	MDR	LIN-2
SRR671843	Zhang et al., 2013	China	MDR	LIN-2
SRR671845	Zhang et al., 2013	China	monoDR	LIN-2
SRR671847	Zhang et al., 2013	China	monoDR	LIN-2
SRR671848	Zhang et al., 2013	China	MDR	LIN-2
SRR671850	Zhang et al., 2013	China	MDR	LIN-4
SRR671853	Zhang et al., 2013	China	MDR	LIN-4
SRR671857	Zhang et al., 2013	China	MDR	LIN-2
SRR671861	Zhang et al., 2013	China	MDR	LIN-4
SRR671868	Zhang et al., 2013	China	MDR	LIN-4
SRR671869	Zhang et al., 2013	China	MDR	LIN-2
SRR7898218	Shanmugam et al 2019	India	PDR	LIN-1
SRR7898221	Shanmugam et al 2019	India	PDR	LIN-1
SRR7898225	Shanmugam et al 2019	India	PDR	LIN-2
SRR1723963	Hicks et.al.,2018	China	monoDR	LIN-4
SRR1723966	Hicks et.al.,2018	China	monoDR	LIN-4
SRR1723967	Hicks et.al.,2018	China	monoDR	LIN-4
SRR1723971	Hicks et.al.,2018	China	MDR	LIN-4
SRR1723974	Hicks et.al.,2018	China	monoDR	LIN-4
SRR1723975	Hicks et.al.,2018	China	monoDR	LIN-4
SRR1723986	Hicks et.al.,2018	China	monoDR	LIN-4
SRR1723987	Hicks et.al.,2018	China	MDR	LIN-4
SRR1723990	Hicks et.al.,2018	China	monoDR	LIN-4
SRR1723993	Hicks et.al.,2018	China	MDR	LIN-4
SRR1723997	Hicks et.al.,2018	China	monoDR	LIN-4
SRR1724002	Hicks et.al.,2018	China	MDR	LIN-4
SRR1724003	Hicks et.al.,2018	China	MDR	LIN-4
SRR1724004	Hicks et.al.,2018	China	MDR	LIN-4
SRR1724005	Hicks et.al.,2018	China	MDR	LIN-4
SRR1724007	Hicks et.al.,2018	China	MDR	LIN-4
SRR1724009	Hicks et.al.,2018	China	MDR	LIN-4
SRR1724010	Hicks et.al.,2018	China	MDR	LIN-4
SRR1724011	Hicks et.al.,2018	China	MDR	LIN-4
SRR1724014	Hicks et.al.,2018	China	monoDR	LIN-4
ERR015615	Casali et al., 2014	Russia	susceptible	LIN-3
ERR036186	Guerra-Assuncao et al., 2014	Malawi	susceptible	LIN-2
ERR036187	Guerra-Assuncao et al., 2014	Malawi	susceptible	LIN-4
ERR036189	Guerra-Assuncao et al., 2014	Malawi	susceptible	LIN-4
ERR036193	Guerra-Assuncao et al., 2014	Malawi	susceptible	LIN-3
ERR036194	Guerra-Assuncao et al., 2014	Malawi	susceptible	LIN-4
ERR036196	Guerra-Assuncao et al., 2014	Malawi	susceptible	LIN-4
ERR036197	Guerra-Assuncao et al., 2014	Malawi	susceptible	LIN-4
ERR036199	Guerra-Assuncao et al., 2014	Malawi	susceptible	LIN-4
ERR036200	Guerra-Assuncao et al., 2014	Malawi	susceptible	LIN-4
ERR036201	Guerra-Assuncao et al., 2014	Malawi	susceptible	LIN-1
ERR036202	Guerra-Assuncao et al., 2014	Malawi	susceptible	LIN-4
ERR036204	Guerra-Assuncao et al., 2014	Malawi	susceptible	LIN-4
ERR036205	Guerra-Assuncao et al., 2014	Malawi	susceptible	LIN-4
ERR036206	Guerra-Assuncao et al., 2014	Malawi	susceptible	LIN-4
ERR036208	Guerra-Assuncao et al., 2014	Malawi	susceptible	LIN-4
ERR036210	Guerra-Assuncao et al., 2014	Malawi	susceptible	LIN-3
ERR036212	Guerra-Assuncao et al., 2014	Malawi	susceptible	LIN-4
ERR036213	Guerra-Assuncao et al., 2014	Malawi	susceptible	LIN-1
ERR036214	Guerra-Assuncao et al., 2014	Malawi	susceptible	LIN-4
ERR036216	Guerra-Assuncao et al., 2014	Malawi	susceptible	LIN-3
ERR036217	Guerra-Assuncao et al., 2014	Malawi	susceptible	LIN-1
ERR036218	Guerra-Assuncao et al., 2014	Malawi	susceptible	LIN-3
ERR036219	Guerra-Assuncao et al., 2014	Malawi	susceptible	LIN-4
ERR036220	Guerra-Assuncao et al., 2014	Malawi	susceptible	LIN-4
ERR036221	Guerra-Assuncao et al., 2014	Malawi	susceptible	LIN-4
ERR036222	Guerra-Assuncao et al., 2014	Malawi	susceptible	LIN-1
ERR036223	Guerra-Assuncao et al., 2014	Malawi	susceptible	LIN-1
ERR036225	Guerra-Assuncao et al., 2014	Malawi	susceptible	LIN-4
ERR036227	Guerra-Assuncao et al., 2014	Malawi	susceptible	LIN-4
ERR036228	Guerra-Assuncao et al., 2014	Malawi	susceptible	LIN-4
ERR036229	Guerra-Assuncao et al., 2014	Malawi	susceptible	LIN-4
ERR036230	Guerra-Assuncao et al., 2014	Malawi	susceptible	LIN-1
ERR036231	Guerra-Assuncao et al., 2014	Malawi	susceptible	LIN-4
ERR036232	Guerra-Assuncao et al., 2014	Malawi	susceptible	LIN-4
ERR036235	Guerra-Assuncao et al., 2014	Malawi	susceptible	LIN-2
ERR036236	Guerra-Assuncao et al., 2014	Malawi	susceptible	LIN-1
ERR036238	Guerra-Assuncao et al., 2014	Malawi	susceptible	LIN-4
ERR036239	Guerra-Assuncao et al., 2014	Malawi	susceptible	LIN-4
ERR036240	Guerra-Assuncao et al., 2014	Malawi	susceptible	LIN-4
ERR036241	Guerra-Assuncao et al., 2014	Malawi	susceptible	LIN-4
ERR036242	Guerra-Assuncao et al., 2014	Malawi	susceptible	LIN-4
ERR036243	Guerra-Assuncao et al., 2014	Malawi	susceptible	LIN-3
ERR036244	Guerra-Assuncao et al., 2014	Malawi	susceptible	LIN-4
ERR036245	Guerra-Assuncao et al., 2014	Malawi	susceptible	LIN-4
ERR036246	Guerra-Assuncao et al., 2014	Malawi	susceptible	LIN-4
ERR036247	Guerra-Assuncao et al., 2014	Malawi	susceptible	LIN-4
ERR036248	Guerra-Assuncao et al., 2014	Malawi	susceptible	LIN-4
ERR037467	Guerra-Assuncao et al., 2014	Malawi	susceptible	LIN-4
ERR037468	Guerra-Assuncao et al., 2014	Malawi	susceptible	LIN-4
ERR037470	Guerra-Assuncao et al., 2014	Malawi	susceptible	LIN-4
ERR037471	Guerra-Assuncao et al., 2014	Malawi	susceptible	LIN-4
ERR037472	Guerra-Assuncao et al., 2014	Malawi	susceptible	LIN-4
ERR037473	Guerra-Assuncao et al., 2014	Malawi	susceptible	LIN-1
ERR037474	Guerra-Assuncao et al., 2014	Malawi	susceptible	LIN-4
ERR037475	Guerra-Assuncao et al., 2014	Malawi	susceptible	LIN-1
ERR037476	Guerra-Assuncao et al., 2014	Malawi	susceptible	LIN-4
ERR037477	Guerra-Assuncao et al., 2014	Malawi	susceptible	LIN-4
ERR037478	Guerra-Assuncao et al., 2014	Malawi	susceptible	LIN-4
ERR037479	Guerra-Assuncao et al., 2014	Malawi	susceptible	LIN-4
ERR037480	Guerra-Assuncao et al., 2014	Malawi	susceptible	LIN-4
ERR037481	Guerra-Assuncao et al., 2014	Malawi	susceptible	LIN-4
ERR037483	Guerra-Assuncao et al., 2014	Malawi	susceptible	LIN-4
ERR037484	Guerra-Assuncao et al., 2014	Malawi	susceptible	LIN-4
ERR037485	Guerra-Assuncao et al., 2014	Malawi	susceptible	LIN-4
ERR037487	Guerra-Assuncao et al., 2014	Malawi	susceptible	LIN-1
ERR037489	Guerra-Assuncao et al., 2014	Malawi	susceptible	LIN-1
ERR037490	Guerra-Assuncao et al., 2014	Malawi	susceptible	LIN-4
ERR037492	Guerra-Assuncao et al., 2014	Malawi	susceptible	LIN-3
ERR037493	Guerra-Assuncao et al., 2014	Malawi	susceptible	LIN-4
ERR037494	Guerra-Assuncao et al., 2014	Malawi	susceptible	LIN-4
ERR037495	Guerra-Assuncao et al., 2014	Malawi	susceptible	LIN-4
ERR037496	Guerra-Assuncao et al., 2014	Malawi	susceptible	LIN-1
ERR037497	Guerra-Assuncao et al., 2014	Malawi	susceptible	LIN-4
ERR037498	Guerra-Assuncao et al., 2014	Malawi	susceptible	LIN-4
ERR037499	Guerra-Assuncao et al., 2014	Malawi	susceptible	LIN-4
ERR037500	Guerra-Assuncao et al., 2014	Malawi	susceptible	LIN-4
ERR037501	Guerra-Assuncao et al., 2014	Malawi	susceptible	LIN-4
ERR037502	Guerra-Assuncao et al., 2014	Malawi	susceptible	LIN-3
ERR037503	Guerra-Assuncao et al., 2014	Malawi	susceptible	LIN-4
ERR037505	Guerra-Assuncao et al., 2014	Malawi	susceptible	LIN-4
ERR037506	Guerra-Assuncao et al., 2014	Malawi	susceptible	LIN-4
ERR037507	Guerra-Assuncao et al., 2014	Malawi	susceptible	LIN-4
ERR037508	Guerra-Assuncao et al., 2014	Malawi	susceptible	LIN-4
ERR037509	Guerra-Assuncao et al., 2014	Malawi	susceptible	LIN-4
ERR037510	Guerra-Assuncao et al., 2014	Malawi	susceptible	LIN-1
ERR037511	Guerra-Assuncao et al., 2014	Malawi	susceptible	LIN-1
ERR037512	Guerra-Assuncao et al., 2014	Malawi	susceptible	LIN-4
ERR037513	Guerra-Assuncao et al., 2014	Malawi	susceptible	LIN-4
ERR037514	Guerra-Assuncao et al., 2014	Malawi	susceptible	LIN-4
ERR037515	Guerra-Assuncao et al., 2014	Malawi	susceptible	LIN-4
ERR037516	Guerra-Assuncao et al., 2014	Malawi	susceptible	LIN-4
ERR037517	Guerra-Assuncao et al., 2014	Malawi	susceptible	LIN-4
ERR037519	Guerra-Assuncao et al., 2014	Malawi	susceptible	LIN-1
ERR037520	Guerra-Assuncao et al., 2014	Malawi	susceptible	LIN-1
ERR037521	Guerra-Assuncao et al., 2014	Malawi	susceptible	LIN-1
ERR037523	Guerra-Assuncao et al., 2014	Malawi	susceptible	LIN-1
ERR037524	Guerra-Assuncao et al., 2014	Malawi	susceptible	LIN-4
ERR037525	Guerra-Assuncao et al., 2014	Malawi	susceptible	LIN-4
ERR037526	Guerra-Assuncao et al., 2014	Malawi	susceptible	LIN-4
ERR037527	Guerra-Assuncao et al., 2014	Malawi	susceptible	LIN-4
ERR037528	Guerra-Assuncao et al., 2014	Malawi	susceptible	LIN-4
ERR037529	Guerra-Assuncao et al., 2014	Malawi	susceptible	LIN-4
ERR037530	Guerra-Assuncao et al., 2014	Malawi	susceptible	LIN-4
ERR037531	Guerra-Assuncao et al., 2014	Malawi	susceptible	LIN-4
ERR037532	Guerra-Assuncao et al., 2014	Malawi	susceptible	LIN-4
ERR037533	Guerra-Assuncao et al., 2014	Malawi	susceptible	LIN-4
ERR037534	Guerra-Assuncao et al., 2014	Malawi	susceptible	LIN-4
ERR037535	Guerra-Assuncao et al., 2014	Malawi	susceptible	LIN-4
ERR037536	Guerra-Assuncao et al., 2014	Malawi	susceptible	LIN-1
ERR037537	Guerra-Assuncao et al., 2014	Malawi	susceptible	LIN-4
ERR037538	Guerra-Assuncao et al., 2014	Malawi	susceptible	LIN-4
ERR037539	Guerra-Assuncao et al., 2014	Malawi	susceptible	LIN-4
ERR037540	Guerra-Assuncao et al., 2014	Malawi	susceptible	LIN-4
ERR037541	Guerra-Assuncao et al., 2014	Malawi	susceptible	LIN-4
ERR037542	Guerra-Assuncao et al., 2014	Malawi	susceptible	LIN-4
ERR037543	Guerra-Assuncao et al., 2014	Malawi	susceptible	LIN-4
ERR037544	Guerra-Assuncao et al., 2014	Malawi	susceptible	LIN-4
ERR037545	Guerra-Assuncao et al., 2014	Malawi	susceptible	LIN-4
ERR037546	Guerra-Assuncao et al., 2014	Malawi	susceptible	LIN-3
ERR037548	Guerra-Assuncao et al., 2014	Malawi	susceptible	LIN-4
ERR037549	Guerra-Assuncao et al., 2014	Malawi	susceptible	LIN-4
ERR037550	Guerra-Assuncao et al., 2014	Malawi	susceptible	LIN-4
ERR037551	Guerra-Assuncao et al., 2014	Malawi	susceptible	LIN-2
ERR037552	Guerra-Assuncao et al., 2014	Malawi	susceptible	LIN-4
ERR037553	Guerra-Assuncao et al., 2014	Malawi	susceptible	LIN-4
ERR037554	Guerra-Assuncao et al., 2014	Malawi	susceptible	LIN-4
ERR037555	Guerra-Assuncao et al., 2014	Malawi	susceptible	LIN-1
ERR040112	Clark et al., 2013	Uganda	susceptible	LIN-4
ERR040113	Clark et al., 2013	Uganda	susceptible	LIN-4
ERR040114	Clark et al., 2013	Uganda	susceptible	LIN-3
ERR040115	Clark et al., 2013	Uganda	susceptible	LIN-4
ERR040116	Clark et al., 2013	Uganda	susceptible	LIN-4
ERR040117	Clark et al., 2013	Uganda	susceptible	LIN-4
ERR040133	Clark et al., 2013	Uganda	susceptible	LIN-3
ERR067579	Casali et al., 2014	Russia	susceptible	LIN-4
ERR067580	Casali et al., 2014	Russia	susceptible	LIN-2
ERR067585	Casali et al., 2014	Russia	susceptible	LIN-4
ERR067591	Casali et al., 2014	Russia	susceptible	LIN-4
ERR067594	Casali et al., 2014	Russia	susceptible	LIN-2
ERR067595	Casali et al., 2014	Russia	susceptible	LIN-2
ERR067597	Casali et al., 2014	Russia	susceptible	LIN-4
ERR067601	Casali et al., 2014	Russia	susceptible	LIN-4
ERR067604	Casali et al., 2014	Russia	susceptible	LIN-2
ERR067606	Casali et al., 2014	Russia	susceptible	LIN-4
ERR067607	Casali et al., 2014	Russia	susceptible	LIN-4
ERR067614	Casali et al., 2014	Russia	susceptible	LIN-4
ERR067616	Casali et al., 2014	Russia	susceptible	LIN-4
ERR067617	Casali et al., 2014	Russia	susceptible	LIN-4
ERR067624	Casali et al., 2014	Russia	susceptible	LIN-4
ERR067632	Casali et al., 2014	Russia	susceptible	LIN-4
ERR067634	Casali et al., 2014	Russia	susceptible	LIN-4
ERR067637	Casali et al., 2014	Russia	susceptible	LIN-2
ERR067639	Casali et al., 2014	Russia	susceptible	LIN-2
ERR067640	Casali et al., 2014	Russia	susceptible	LIN-4
ERR067648	Casali et al., 2014	Russia	susceptible	LIN-2
ERR067655	Casali et al., 2014	Russia	susceptible	LIN-2
ERR067658	Casali et al., 2014	Russia	susceptible	LIN-4
ERR067675	Casali et al., 2014	Russia	susceptible	LIN-4
ERR067676	Casali et al., 2014	Russia	susceptible	LIN-4
ERR067680	Casali et al., 2014	Russia	susceptible	LIN-4
ERR067682	Casali et al., 2014	Russia	susceptible	LIN-4
ERR067684	Casali et al., 2014	Russia	susceptible	LIN-4
ERR067686	Casali et al., 2014	Russia	susceptible	LIN-2
ERR067688	Casali et al., 2014	Russia	susceptible	LIN-2
ERR067689	Casali et al., 2014	Russia	susceptible	LIN-2
ERR067690	Casali et al., 2014	Russia	susceptible	LIN-4
ERR067693	Casali et al., 2014	Russia	susceptible	LIN-4
ERR067700	Casali et al., 2014	Russia	susceptible	LIN-4
ERR067702	Casali et al., 2014	Russia	susceptible	LIN-2
ERR067703	Casali et al., 2014	Russia	susceptible	LIN-4
ERR067706	Casali et al., 2014	Russia	susceptible	LIN-4
ERR067708	Casali et al., 2014	Russia	susceptible	LIN-4
ERR067713	Casali et al., 2014	Russia	susceptible	LIN-2
ERR067716	Casali et al., 2014	Russia	susceptible	LIN-4
ERR067719	Casali et al., 2014	Russia	susceptible	LIN-4
ERR067725	Casali et al., 2014	Russia	susceptible	LIN-4
ERR067726	Casali et al., 2014	Russia	susceptible	LIN-4
ERR067727	Casali et al., 2014	Russia	susceptible	LIN-4
ERR067729	Casali et al., 2014	Russia	susceptible	LIN-4
ERR067730	Casali et al., 2014	Russia	susceptible	LIN-4
ERR067731	Casali et al., 2014	Russia	susceptible	LIN-4
ERR067734	Casali et al., 2014	Russia	susceptible	LIN-4
ERR067736	Casali et al., 2014	Russia	susceptible	LIN-2
ERR067737	Casali et al., 2014	Russia	susceptible	LIN-4
ERR067740	Casali et al., 2014	Russia	susceptible	LIN-2
ERR067743	Casali et al., 2014	Russia	susceptible	LIN-2
ERR067746	Casali et al., 2014	Russia	susceptible	LIN-2
ERR067747	Casali et al., 2014	Russia	susceptible	LIN-4
ERR067751	Casali et al., 2014	Russia	susceptible	LIN-4
ERR067753	Casali et al., 2014	Russia	susceptible	LIN-4
ERR067756	Casali et al., 2014	Russia	susceptible	LIN-4
ERR067757	Casali et al., 2014	Russia	susceptible	LIN-4
ERR067763	Casali et al., 2014	Russia	susceptible	LIN-4
ERR067766	Casali et al., 2014	Russia	susceptible	LIN-2
ERR067767	Casali et al., 2014	Russia	susceptible	LIN-4
ERR108424	Casali et al., 2014	Russia	susceptible	LIN-4
ERR108427	Casali et al., 2014	Russia	susceptible	LIN-4
ERR108430	Casali et al., 2014	Russia	susceptible	LIN-2
ERR108432	Casali et al., 2014	Russia	susceptible	LIN-4
ERR108433	Casali et al., 2014	Russia	susceptible	LIN-2
ERR108434	Casali et al., 2014	Russia	susceptible	LIN-2
ERR108437	Casali et al., 2014	Russia	susceptible	LIN-4
ERR108440	Casali et al., 2014	Russia	susceptible	LIN-2
ERR108441	Casali et al., 2014	Russia	susceptible	LIN-2
ERR108442	Casali et al., 2014	Russia	susceptible	LIN-4
ERR108444	Casali et al., 2014	Russia	susceptible	LIN-4
ERR108445	Casali et al., 2014	Russia	susceptible	LIN-4
ERR108446	Casali et al., 2014	Russia	susceptible	LIN-4
ERR108448	Casali et al., 2014	Russia	susceptible	LIN-4
ERR108449	Casali et al., 2014	Russia	susceptible	LIN-4
ERR108451	Casali et al., 2014	Russia	susceptible	LIN-4
ERR108452	Casali et al., 2014	Russia	susceptible	LIN-2
ERR108456	Casali et al., 2014	Russia	susceptible	LIN-4
ERR108459	Casali et al., 2014	Russia	susceptible	LIN-4
ERR108460	Casali et al., 2014	Russia	susceptible	LIN-4
ERR108461	Casali et al., 2014	Russia	susceptible	LIN-4
ERR108463	Casali et al., 2014	Russia	susceptible	LIN-4
ERR108465	Casali et al., 2014	Russia	susceptible	LIN-4
ERR108466	Casali et al., 2014	Russia	susceptible	LIN-4
ERR108468	Casali et al., 2014	Russia	susceptible	LIN-4
ERR108470	Casali et al., 2014	Russia	susceptible	LIN-2
ERR108472	Casali et al., 2014	Russia	susceptible	LIN-4
ERR108476	Casali et al., 2014	Russia	susceptible	LIN-4
ERR108478	Casali et al., 2014	Russia	susceptible	LIN-4
ERR108479	Casali et al., 2014	Russia	susceptible	LIN-2
ERR108481	Casali et al., 2014	Russia	susceptible	LIN-4
ERR108483	Casali et al., 2014	Russia	susceptible	LIN-4
ERR108486	Casali et al., 2014	Russia	susceptible	LIN-2
ERR108487	Casali et al., 2014	Russia	susceptible	LIN-4
ERR108490	Casali et al., 2014	Russia	susceptible	LIN-2
ERR108496	Casali et al., 2014	Russia	susceptible	LIN-2
ERR108497	Casali et al., 2014	Russia	susceptible	LIN-4
ERR108501	Casali et al., 2014	Russia	susceptible	LIN-2
ERR108504	Casali et al., 2014	Russia	susceptible	LIN-4
ERR108508	Casali et al., 2014	Russia	susceptible	LIN-4
ERR108509	Casali et al., 2014	Russia	susceptible	LIN-4
ERR108513	Casali et al., 2014	Russia	susceptible	LIN-2
ERR117449	Casali et al., 2014	Russia	susceptible	LIN-2
ERR117450	Casali et al., 2014	Russia	susceptible	LIN-4
ERR117451	Casali et al., 2014	Russia	susceptible	LIN-4
ERR117455	Casali et al., 2014	Russia	susceptible	LIN-2
ERR117457	Casali et al., 2014	Russia	susceptible	LIN-2
ERR117458	Casali et al., 2014	Russia	susceptible	LIN-2
ERR117465	Casali et al., 2014	Russia	susceptible	LIN-2
ERR117467	Casali et al., 2014	Russia	susceptible	LIN-2
ERR124634	Guerra-Assuncao et al., 2014	Malawi	susceptible	LIN-4
ERR124635	Guerra-Assuncao et al., 2014	Malawi	susceptible	LIN-4
ERR124637	Guerra-Assuncao et al., 2014	Malawi	susceptible	LIN-4
ERR124638	Guerra-Assuncao et al., 2014	Malawi	susceptible	LIN-4
ERR124639	Guerra-Assuncao et al., 2014	Malawi	susceptible	LIN-4
ERR124640	Guerra-Assuncao et al., 2014	Malawi	susceptible	LIN-1
ERR124641	Guerra-Assuncao et al., 2014	Malawi	susceptible	LIN-4
ERR124643	Guerra-Assuncao et al., 2014	Malawi	susceptible	LIN-4
ERR124644	Guerra-Assuncao et al., 2014	Malawi	susceptible	LIN-4
ERR124645	Guerra-Assuncao et al., 2014	Malawi	susceptible	LIN-3
ERR124646	Guerra-Assuncao et al., 2014	Malawi	susceptible	LIN-3
ERR124647	Guerra-Assuncao et al., 2014	Malawi	susceptible	LIN-4
ERR124648	Guerra-Assuncao et al., 2014	Malawi	susceptible	LIN-4
ERR124649	Guerra-Assuncao et al., 2014	Malawi	susceptible	LIN-4
ERR124650	Guerra-Assuncao et al., 2014	Malawi	susceptible	LIN-4
ERR126598	Guerra-Assuncao et al., 2014	Malawi	susceptible	LIN-3
ERR126599	Guerra-Assuncao et al., 2014	Malawi	susceptible	LIN-4
ERR126601	Guerra-Assuncao et al., 2014	Malawi	susceptible	LIN-4
ERR126602	Guerra-Assuncao et al., 2014	Malawi	susceptible	LIN-1
ERR126603	Guerra-Assuncao et al., 2014	Malawi	susceptible	LIN-4
ERR126604	Guerra-Assuncao et al., 2014	Malawi	susceptible	LIN-3
ERR126606	Guerra-Assuncao et al., 2014	Malawi	susceptible	LIN-2
ERR126607	Guerra-Assuncao et al., 2014	Malawi	susceptible	LIN-1
ERR126609	Guerra-Assuncao et al., 2014	Malawi	susceptible	LIN-4
ERR126610	Guerra-Assuncao et al., 2014	Malawi	susceptible	LIN-4
ERR126611	Guerra-Assuncao et al., 2014	Malawi	susceptible	LIN-4
ERR126612	Guerra-Assuncao et al., 2014	Malawi	susceptible	LIN-4
ERR126613	Guerra-Assuncao et al., 2014	Malawi	susceptible	LIN-4
ERR126614	Guerra-Assuncao et al., 2014	Malawi	susceptible	LIN-4
ERR126615	Guerra-Assuncao et al., 2014	Malawi	susceptible	LIN-4
ERR126616	Guerra-Assuncao et al., 2014	Malawi	susceptible	LIN-3
ERR126617	Guerra-Assuncao et al., 2014	Malawi	susceptible	LIN-3
ERR126619	Guerra-Assuncao et al., 2014	Malawi	susceptible	LIN-4
ERR126620	Guerra-Assuncao et al., 2014	Malawi	susceptible	LIN-1
ERR126621	Guerra-Assuncao et al., 2014	Malawi	susceptible	LIN-4
ERR126622	Guerra-Assuncao et al., 2014	Malawi	susceptible	LIN-4
ERR126623	Guerra-Assuncao et al., 2014	Malawi	susceptible	LIN-4
ERR126624	Guerra-Assuncao et al., 2014	Malawi	susceptible	LIN-4
ERR126625	Guerra-Assuncao et al., 2014	Malawi	susceptible	LIN-4
ERR126626	Guerra-Assuncao et al., 2014	Malawi	susceptible	LIN-4
ERR126627	Guerra-Assuncao et al., 2014	Malawi	susceptible	LIN-4
ERR126628	Guerra-Assuncao et al., 2014	Malawi	susceptible	LIN-4
ERR126629	Guerra-Assuncao et al., 2014	Malawi	susceptible	LIN-4
ERR126630	Guerra-Assuncao et al., 2014	Malawi	susceptible	LIN-1
ERR126631	Guerra-Assuncao et al., 2014	Malawi	susceptible	LIN-4
ERR126632	Guerra-Assuncao et al., 2014	Malawi	susceptible	LIN-4
ERR126634	Guerra-Assuncao et al., 2014	Malawi	susceptible	LIN-4
ERR126635	Guerra-Assuncao et al., 2014	Malawi	susceptible	LIN-4
ERR126636	Guerra-Assuncao et al., 2014	Malawi	susceptible	LIN-1
ERR126637	Guerra-Assuncao et al., 2014	Malawi	susceptible	LIN-4
ERR126638	Guerra-Assuncao et al., 2014	Malawi	susceptible	LIN-4
ERR126640	Guerra-Assuncao et al., 2014	Malawi	susceptible	LIN-3
ERR126642	Guerra-Assuncao et al., 2014	Malawi	susceptible	LIN-4
ERR126643	Guerra-Assuncao et al., 2014	Malawi	susceptible	LIN-4
ERR126644	Guerra-Assuncao et al., 2014	Malawi	susceptible	LIN-3
ERR133801	Casali et al., 2014	Russia	susceptible	LIN-4
ERR133802	Casali et al., 2014	Russia	susceptible	LIN-2
ERR133803	Casali et al., 2014	Russia	susceptible	LIN-4
ERR133807	Casali et al., 2014	Russia	susceptible	LIN-4
ERR133808	Casali et al., 2014	Russia	susceptible	LIN-4
ERR133810	Casali et al., 2014	Russia	susceptible	LIN-2
ERR133811	Casali et al., 2014	Russia	susceptible	LIN-4
ERR133813	Casali et al., 2014	Russia	susceptible	LIN-4
ERR133817	Casali et al., 2014	Russia	susceptible	LIN-4
ERR133818	Casali et al., 2014	Russia	susceptible	LIN-4
ERR133819	Casali et al., 2014	Russia	susceptible	LIN-4
ERR133820	Casali et al., 2014	Russia	susceptible	LIN-2
ERR133822	Casali et al., 2014	Russia	susceptible	LIN-4
ERR133824	Casali et al., 2014	Russia	susceptible	LIN-4
ERR133828	Casali et al., 2014	Russia	susceptible	LIN-4
ERR133829	Casali et al., 2014	Russia	susceptible	LIN-4
ERR133830	Casali et al., 2014	Russia	susceptible	LIN-4
ERR133832	Casali et al., 2014	Russia	susceptible	LIN-4
ERR133833	Casali et al., 2014	Russia	susceptible	LIN-4
ERR133836	Casali et al., 2014	Russia	susceptible	LIN-4
ERR133840	Casali et al., 2014	Russia	susceptible	LIN-2
ERR133841	Casali et al., 2014	Russia	susceptible	LIN-4
ERR133843	Casali et al., 2014	Russia	susceptible	LIN-2
ERR133846	Casali et al., 2014	Russia	susceptible	LIN-4
ERR133847	Casali et al., 2014	Russia	susceptible	LIN-2
ERR133850	Casali et al., 2014	Russia	susceptible	LIN-4
ERR133851	Casali et al., 2014	Russia	susceptible	LIN-4
ERR133857	Casali et al., 2014	Russia	susceptible	LIN-4
ERR133859	Casali et al., 2014	Russia	susceptible	LIN-2
ERR133864	Casali et al., 2014	Russia	susceptible	LIN-4
ERR133870	Casali et al., 2014	Russia	susceptible	LIN-4
ERR133871	Casali et al., 2014	Russia	susceptible	LIN-2
ERR133872	Casali et al., 2014	Russia	susceptible	LIN-4
ERR133874	Casali et al., 2014	Russia	susceptible	LIN-4
ERR133875	Casali et al., 2014	Russia	susceptible	LIN-2
ERR133876	Casali et al., 2014	Russia	susceptible	LIN-4
ERR133877	Casali et al., 2014	Russia	susceptible	LIN-4
ERR133881	Casali et al., 2014	Russia	susceptible	LIN-4
ERR133883	Casali et al., 2014	Russia	susceptible	LIN-4
ERR133891	Casali et al., 2014	Russia	susceptible	LIN-2
ERR133893	Casali et al., 2014	Russia	susceptible	LIN-4
ERR133897	Casali et al., 2014	Russia	susceptible	LIN-4
ERR133898	Casali et al., 2014	Russia	susceptible	LIN-2
ERR133904	Casali et al., 2014	Russia	susceptible	LIN-2
ERR133905	Casali et al., 2014	Russia	susceptible	LIN-4
ERR133912	Casali et al., 2014	Russia	susceptible	LIN-4
ERR133920	Casali et al., 2014	Russia	susceptible	LIN-4
ERR133921	Casali et al., 2014	Russia	susceptible	LIN-4
ERR133925	Casali et al., 2014	Russia	susceptible	LIN-2
ERR133926	Casali et al., 2014	Russia	susceptible	LIN-2
ERR133929	Casali et al., 2014	Russia	susceptible	LIN-2
ERR133932	Casali et al., 2014	Russia	susceptible	LIN-2
ERR133934	Casali et al., 2014	Russia	susceptible	LIN-4
ERR133938	Casali et al., 2014	Russia	susceptible	LIN-4
ERR133939	Casali et al., 2014	Russia	susceptible	LIN-4
ERR133941	Casali et al., 2014	Russia	susceptible	LIN-2
ERR133946	Casali et al., 2014	Russia	susceptible	LIN-2
ERR133948	Casali et al., 2014	Russia	susceptible	LIN-2
ERR133949	Casali et al., 2014	Russia	susceptible	LIN-4
ERR133950	Casali et al., 2014	Russia	susceptible	LIN-2
ERR133952	Casali et al., 2014	Russia	susceptible	LIN-4
ERR133956	Casali et al., 2014	Russia	susceptible	LIN-4
ERR133958	Casali et al., 2014	Russia	susceptible	LIN-2
ERR133960	Casali et al., 2014	Russia	susceptible	LIN-2
ERR133962	Casali et al., 2014	Russia	susceptible	LIN-4
ERR133964	Casali et al., 2014	Russia	susceptible	LIN-4
ERR133965	Casali et al., 2014	Russia	susceptible	LIN-4
ERR133967	Casali et al., 2014	Russia	susceptible	LIN-4
ERR133971	Casali et al., 2014	Russia	susceptible	LIN-4
ERR133974	Casali et al., 2014	Russia	susceptible	LIN-4
ERR133978	Casali et al., 2014	Russia	susceptible	LIN-4
ERR133979	Casali et al., 2014	Russia	susceptible	LIN-2
ERR133983	Casali et al., 2014	Russia	susceptible	LIN-2
ERR133987	Casali et al., 2014	Russia	susceptible	LIN-2
ERR133989	Casali et al., 2014	Russia	susceptible	LIN-4
ERR137195	Casali et al., 2014	Russia	susceptible	LIN-2
ERR137197	Casali et al., 2014	Russia	susceptible	LIN-4
ERR137199	Casali et al., 2014	Russia	susceptible	LIN-4
ERR137200	Casali et al., 2014	Russia	susceptible	LIN-4
ERR137203	Casali et al., 2014	Russia	susceptible	LIN-2
ERR137207	Casali et al., 2014	Russia	susceptible	LIN-2
ERR137213	Casali et al., 2014	Russia	susceptible	LIN-4
ERR137214	Casali et al., 2014	Russia	susceptible	LIN-4
ERR137215	Casali et al., 2014	Russia	susceptible	LIN-2
ERR137232	Casali et al., 2014	Russia	susceptible	LIN-2
ERR137238	Casali et al., 2014	Russia	susceptible	LIN-4
ERR137239	Casali et al., 2014	Russia	susceptible	LIN-4
ERR137241	Casali et al., 2014	Russia	susceptible	LIN-2
ERR137245	Casali et al., 2014	Russia	susceptible	LIN-4
ERR137249	Casali et al., 2014	Russia	susceptible	LIN-2
ERR137251	Casali et al., 2014	Russia	susceptible	LIN-4
ERR137252	Casali et al., 2014	Russia	susceptible	LIN-2
ERR137253	Casali et al., 2014	Russia	susceptible	LIN-2
ERR137261	Casali et al., 2014	Russia	susceptible	LIN-4
ERR137263	Casali et al., 2014	Russia	susceptible	LIN-2
ERR137268	Casali et al., 2014	Russia	susceptible	LIN-2
ERR137279	Casali et al., 2014	Russia	susceptible	LIN-2
ERR137280	Casali et al., 2014	Russia	susceptible	LIN-4
ERR137285	Casali et al., 2014	Russia	susceptible	LIN-2
ERR144544	Casali et al., 2014	Russia	susceptible	LIN-4
ERR144546	Casali et al., 2014	Russia	susceptible	LIN-4
ERR144547	Casali et al., 2014	Russia	susceptible	LIN-4
ERR144552	Casali et al., 2014	Russia	susceptible	LIN-2
ERR144555	Casali et al., 2014	Russia	susceptible	LIN-4
ERR144569	Casali et al., 2014	Russia	susceptible	LIN-4
ERR144578	Casali et al., 2014	Russia	susceptible	LIN-4
ERR144582	Casali et al., 2014	Russia	susceptible	LIN-2
ERR144585	Casali et al., 2014	Russia	susceptible	LIN-4
ERR144587	Casali et al., 2014	Russia	susceptible	LIN-4
ERR144592	Casali et al., 2014	Russia	susceptible	LIN-4
ERR144602	Casali et al., 2014	Russia	susceptible	LIN-4
ERR144603	Casali et al., 2014	Russia	susceptible	LIN-4
ERR144606	Casali et al., 2014	Russia	susceptible	LIN-2
ERR144609	Casali et al., 2014	Russia	susceptible	LIN-2
ERR144610	Casali et al., 2014	Russia	susceptible	LIN-2
ERR144613	Casali et al., 2014	Russia	susceptible	LIN-4
ERR144614	Casali et al., 2014	Russia	susceptible	LIN-2
ERR144616	Casali et al., 2014	Russia	susceptible	LIN-2
ERR144625	Casali et al., 2014	Russia	susceptible	LIN-2
ERR144626	Casali et al., 2014	Russia	susceptible	LIN-2
ERR144630	Casali et al., 2014	Russia	susceptible	LIN-2
ERR158574	Casali et al., 2014	Russia	susceptible	LIN-2
ERR158575	Casali et al., 2014	Russia	susceptible	LIN-2
ERR158577	Casali et al., 2014	Russia	susceptible	LIN-2
ERR158582	Casali et al., 2014	Russia	susceptible	LIN-4
ERR158593	Casali et al., 2014	Russia	susceptible	LIN-2
ERR158612	Casali et al., 2014	Russia	susceptible	LIN-4
ERR161013	Guerra-Assuncao et al., 2014	Malawi	susceptible	LIN-4
ERR161015	Guerra-Assuncao et al., 2014	Malawi	susceptible	LIN-4
ERR161016	Guerra-Assuncao et al., 2014	Malawi	susceptible	LIN-4
ERR161017	Guerra-Assuncao et al., 2014	Malawi	susceptible	LIN-4
ERR161018	Guerra-Assuncao et al., 2014	Malawi	susceptible	LIN-4
ERR161019	Guerra-Assuncao et al., 2014	Malawi	susceptible	LIN-4
ERR161020	Guerra-Assuncao et al., 2014	Malawi	susceptible	LIN-4
ERR161021	Guerra-Assuncao et al., 2014	Malawi	susceptible	LIN-4
ERR161022	Guerra-Assuncao et al., 2014	Malawi	susceptible	LIN-4
ERR161023	Guerra-Assuncao et al., 2014	Malawi	susceptible	LIN-4
ERR161025	Guerra-Assuncao et al., 2014	Malawi	susceptible	LIN-4
ERR161028	Guerra-Assuncao et al., 2014	Malawi	susceptible	LIN-4
ERR161029	Guerra-Assuncao et al., 2014	Malawi	susceptible	LIN-4
ERR161030	Guerra-Assuncao et al., 2014	Malawi	susceptible	LIN-4
ERR161031	Guerra-Assuncao et al., 2014	Malawi	susceptible	LIN-1
ERR161032	Guerra-Assuncao et al., 2014	Malawi	susceptible	LIN-4
ERR161035	Guerra-Assuncao et al., 2014	Malawi	susceptible	LIN-4
ERR161036	Guerra-Assuncao et al., 2014	Malawi	susceptible	LIN-4
ERR161038	Guerra-Assuncao et al., 2014	Malawi	susceptible	LIN-4
ERR161040	Guerra-Assuncao et al., 2014	Malawi	susceptible	LIN-3
ERR161041	Guerra-Assuncao et al., 2014	Malawi	susceptible	LIN-4
ERR161042	Guerra-Assuncao et al., 2014	Malawi	susceptible	LIN-4
ERR161044	Guerra-Assuncao et al., 2014	Malawi	susceptible	LIN-B
ERR161045	Guerra-Assuncao et al., 2014	Malawi	susceptible	LIN-4
ERR161046	Guerra-Assuncao et al., 2014	Malawi	susceptible	LIN-4
ERR161047	Guerra-Assuncao et al., 2014	Malawi	susceptible	LIN-4
ERR161048	Guerra-Assuncao et al., 2014	Malawi	susceptible	LIN-B
ERR161051	Guerra-Assuncao et al., 2014	Malawi	susceptible	LIN-4
ERR161052	Guerra-Assuncao et al., 2014	Malawi	susceptible	LIN-4
ERR161054	Guerra-Assuncao et al., 2014	Malawi	susceptible	LIN-4
ERR161056	Guerra-Assuncao et al., 2014	Malawi	susceptible	LIN-4
ERR161057	Guerra-Assuncao et al., 2014	Malawi	susceptible	LIN-4
ERR161058	Guerra-Assuncao et al., 2014	Malawi	susceptible	LIN-4
ERR161062	Guerra-Assuncao et al., 2014	Malawi	susceptible	LIN-3
ERR161063	Guerra-Assuncao et al., 2014	Malawi	susceptible	LIN-1
ERR161064	Guerra-Assuncao et al., 2014	Malawi	susceptible	LIN-3
ERR161065	Guerra-Assuncao et al., 2014	Malawi	susceptible	LIN-3
ERR161066	Guerra-Assuncao et al., 2014	Malawi	susceptible	LIN-4
ERR161067	Guerra-Assuncao et al., 2014	Malawi	susceptible	LIN-4
ERR161068	Guerra-Assuncao et al., 2014	Malawi	susceptible	LIN-4
ERR161069	Guerra-Assuncao et al., 2014	Malawi	susceptible	LIN-4
ERR161070	Guerra-Assuncao et al., 2014	Malawi	susceptible	LIN-4
ERR161073	Guerra-Assuncao et al., 2014	Malawi	susceptible	LIN-4
ERR161074	Guerra-Assuncao et al., 2014	Malawi	susceptible	LIN-4
ERR161075	Guerra-Assuncao et al., 2014	Malawi	susceptible	LIN-4
ERR161076	Guerra-Assuncao et al., 2014	Malawi	susceptible	LIN-4
ERR161079	Guerra-Assuncao et al., 2014	Malawi	susceptible	LIN-3
ERR161080	Guerra-Assuncao et al., 2014	Malawi	susceptible	LIN-4
ERR161081	Guerra-Assuncao et al., 2014	Malawi	susceptible	LIN-4
ERR161082	Guerra-Assuncao et al., 2014	Malawi	susceptible	LIN-3
ERR161083	Guerra-Assuncao et al., 2014	Malawi	susceptible	LIN-3
ERR161086	Guerra-Assuncao et al., 2014	Malawi	susceptible	LIN-3
ERR161087	Guerra-Assuncao et al., 2014	Malawi	susceptible	LIN-1
ERR161088	Guerra-Assuncao et al., 2014	Malawi	susceptible	LIN-1
ERR161089	Guerra-Assuncao et al., 2014	Malawi	susceptible	LIN-1
ERR161090	Guerra-Assuncao et al., 2014	Malawi	susceptible	LIN-4
ERR161091	Guerra-Assuncao et al., 2014	Malawi	susceptible	LIN-4
ERR161092	Guerra-Assuncao et al., 2014	Malawi	susceptible	LIN-4
ERR161093	Guerra-Assuncao et al., 2014	Malawi	susceptible	LIN-4
ERR161094	Guerra-Assuncao et al., 2014	Malawi	susceptible	LIN-4
ERR161095	Guerra-Assuncao et al., 2014	Malawi	susceptible	LIN-4
ERR161096	Guerra-Assuncao et al., 2014	Malawi	susceptible	LIN-4
ERR161097	Guerra-Assuncao et al., 2014	Malawi	susceptible	LIN-4
ERR161098	Guerra-Assuncao et al., 2014	Malawi	susceptible	LIN-4
ERR161100	Guerra-Assuncao et al., 2014	Malawi	susceptible	LIN-1
ERR161101	Guerra-Assuncao et al., 2014	Malawi	susceptible	LIN-4
ERR161102	Guerra-Assuncao et al., 2014	Malawi	susceptible	LIN-4
ERR161103	Guerra-Assuncao et al., 2014	Malawi	susceptible	LIN-4
ERR161104	Guerra-Assuncao et al., 2014	Malawi	susceptible	LIN-4
ERR161105	Guerra-Assuncao et al., 2014	Malawi	susceptible	LIN-4
ERR161106	Guerra-Assuncao et al., 2014	Malawi	susceptible	LIN-1
ERR161107	Guerra-Assuncao et al., 2014	Malawi	susceptible	LIN-3
ERR161108	Guerra-Assuncao et al., 2014	Malawi	susceptible	LIN-4
ERR161109	Guerra-Assuncao et al., 2014	Malawi	susceptible	LIN-4
ERR161111	Guerra-Assuncao et al., 2014	Malawi	susceptible	LIN-4
ERR161112	Guerra-Assuncao et al., 2014	Malawi	susceptible	LIN-4
ERR161114	Guerra-Assuncao et al., 2014	Malawi	susceptible	LIN-4
ERR161115	Guerra-Assuncao et al., 2014	Malawi	susceptible	LIN-4
ERR161116	Guerra-Assuncao et al., 2014	Malawi	susceptible	LIN-4
ERR161117	Guerra-Assuncao et al., 2014	Malawi	susceptible	LIN-4
ERR161119	Guerra-Assuncao et al., 2014	Malawi	susceptible	LIN-4
ERR161120	Guerra-Assuncao et al., 2014	Malawi	susceptible	LIN-4
ERR161121	Guerra-Assuncao et al., 2014	Malawi	susceptible	LIN-1
ERR161124	Guerra-Assuncao et al., 2014	Malawi	susceptible	LIN-1
ERR161126	Guerra-Assuncao et al., 2014	Malawi	susceptible	LIN-4
ERR161127	Guerra-Assuncao et al., 2014	Malawi	susceptible	LIN-4
ERR161128	Guerra-Assuncao et al., 2014	Malawi	susceptible	LIN-4
ERR161129	Guerra-Assuncao et al., 2014	Malawi	susceptible	LIN-1
ERR161130	Guerra-Assuncao et al., 2014	Malawi	susceptible	LIN-4
ERR161131	Guerra-Assuncao et al., 2014	Malawi	susceptible	LIN-1
ERR161132	Guerra-Assuncao et al., 2014	Malawi	susceptible	LIN-4
ERR161133	Guerra-Assuncao et al., 2014	Malawi	susceptible	LIN-1
ERR161134	Guerra-Assuncao et al., 2014	Malawi	susceptible	LIN-4
ERR161135	Guerra-Assuncao et al., 2014	Malawi	susceptible	LIN-4
ERR161136	Guerra-Assuncao et al., 2014	Malawi	susceptible	LIN-4
ERR161137	Guerra-Assuncao et al., 2014	Malawi	susceptible	LIN-4
ERR161139	Guerra-Assuncao et al., 2014	Malawi	susceptible	LIN-4
ERR161140	Guerra-Assuncao et al., 2014	Malawi	susceptible	LIN-4
ERR161141	Guerra-Assuncao et al., 2014	Malawi	susceptible	LIN-4
ERR161142	Guerra-Assuncao et al., 2014	Malawi	susceptible	LIN-4
ERR161143	Guerra-Assuncao et al., 2014	Malawi	susceptible	LIN-4
ERR161145	Guerra-Assuncao et al., 2014	Malawi	susceptible	LIN-3
ERR161146	Guerra-Assuncao et al., 2014	Malawi	susceptible	LIN-4
ERR161147	Guerra-Assuncao et al., 2014	Malawi	susceptible	LIN-4
ERR161148	Guerra-Assuncao et al., 2014	Malawi	susceptible	LIN-4
ERR161149	Guerra-Assuncao et al., 2014	Malawi	susceptible	LIN-4
ERR161150	Guerra-Assuncao et al., 2014	Malawi	susceptible	LIN-4
ERR161151	Guerra-Assuncao et al., 2014	Malawi	susceptible	LIN-4
ERR161152	Guerra-Assuncao et al., 2014	Malawi	susceptible	LIN-4
ERR161153	Guerra-Assuncao et al., 2014	Malawi	susceptible	LIN-4
ERR161154	Guerra-Assuncao et al., 2014	Malawi	susceptible	LIN-4
ERR161155	Guerra-Assuncao et al., 2014	Malawi	susceptible	LIN-4
ERR161156	Guerra-Assuncao et al., 2014	Malawi	susceptible	LIN-4
ERR161157	Guerra-Assuncao et al., 2014	Malawi	susceptible	LIN-4
ERR161158	Guerra-Assuncao et al., 2014	Malawi	susceptible	LIN-4
ERR161159	Guerra-Assuncao et al., 2014	Malawi	susceptible	LIN-4
ERR161160	Guerra-Assuncao et al., 2014	Malawi	susceptible	LIN-4
ERR161161	Guerra-Assuncao et al., 2014	Malawi	susceptible	LIN-1
ERR161162	Guerra-Assuncao et al., 2014	Malawi	susceptible	LIN-4
ERR161163	Guerra-Assuncao et al., 2014	Malawi	susceptible	LIN-4
ERR161164	Guerra-Assuncao et al., 2014	Malawi	susceptible	LIN-4
ERR161165	Guerra-Assuncao et al., 2014	Malawi	susceptible	LIN-4
ERR161166	Guerra-Assuncao et al., 2014	Malawi	susceptible	LIN-4
ERR161167	Guerra-Assuncao et al., 2014	Malawi	susceptible	LIN-3
ERR161168	Guerra-Assuncao et al., 2014	Malawi	susceptible	LIN-4
ERR161169	Guerra-Assuncao et al., 2014	Malawi	susceptible	LIN-3
ERR161170	Guerra-Assuncao et al., 2014	Malawi	susceptible	LIN-4
ERR161171	Guerra-Assuncao et al., 2014	Malawi	susceptible	LIN-4
ERR161172	Guerra-Assuncao et al., 2014	Malawi	susceptible	LIN-4
ERR161174	Guerra-Assuncao et al., 2014	Malawi	susceptible	LIN-4
ERR161175	Guerra-Assuncao et al., 2014	Malawi	susceptible	LIN-4
ERR161176	Guerra-Assuncao et al., 2014	Malawi	susceptible	LIN-4
ERR161177	Guerra-Assuncao et al., 2014	Malawi	susceptible	LIN-4
ERR161178	Guerra-Assuncao et al., 2014	Malawi	susceptible	LIN-4
ERR161179	Guerra-Assuncao et al., 2014	Malawi	susceptible	LIN-4
ERR161180	Guerra-Assuncao et al., 2014	Malawi	susceptible	LIN-1
ERR161181	Guerra-Assuncao et al., 2014	Malawi	susceptible	LIN-1
ERR161182	Guerra-Assuncao et al., 2014	Malawi	susceptible	LIN-4
ERR161183	Guerra-Assuncao et al., 2014	Malawi	susceptible	LIN-4
ERR161184	Guerra-Assuncao et al., 2014	Malawi	susceptible	LIN-4
ERR161185	Guerra-Assuncao et al., 2014	Malawi	susceptible	LIN-4
ERR161186	Guerra-Assuncao et al., 2014	Malawi	susceptible	LIN-4
ERR161187	Guerra-Assuncao et al., 2014	Malawi	susceptible	LIN-4
ERR161188	Guerra-Assuncao et al., 2014	Malawi	susceptible	LIN-4
ERR161189	Guerra-Assuncao et al., 2014	Malawi	susceptible	LIN-4
ERR161190	Guerra-Assuncao et al., 2014	Malawi	susceptible	LIN-1
ERR161191	Guerra-Assuncao et al., 2014	Malawi	susceptible	LIN-4
ERR161192	Guerra-Assuncao et al., 2014	Malawi	susceptible	LIN-3
ERR161193	Guerra-Assuncao et al., 2014	Malawi	susceptible	LIN-4
ERR161195	Guerra-Assuncao et al., 2014	Malawi	susceptible	LIN-4
ERR161196	Guerra-Assuncao et al., 2014	Malawi	susceptible	LIN-4
ERR161197	Guerra-Assuncao et al., 2014	Malawi	susceptible	LIN-4
ERR161198	Guerra-Assuncao et al., 2014	Malawi	susceptible	LIN-3
ERR161199	Guerra-Assuncao et al., 2014	Malawi	susceptible	LIN-3
ERR161200	Guerra-Assuncao et al., 2014	Malawi	susceptible	LIN-3
ERR161201	Guerra-Assuncao et al., 2014	Malawi	susceptible	LIN-1
ERR161202	Guerra-Assuncao et al., 2014	Malawi	susceptible	LIN-4
ERR161203	Guerra-Assuncao et al., 2014	Malawi	susceptible	LIN-4
ERR163928	Guerra-Assuncao et al., 2014	Malawi	susceptible	LIN-4
ERR163929	Guerra-Assuncao et al., 2014	Malawi	susceptible	LIN-4
ERR163930	Guerra-Assuncao et al., 2014	Malawi	susceptible	LIN-4
ERR163931	Guerra-Assuncao et al., 2014	Malawi	susceptible	LIN-4
ERR163932	Guerra-Assuncao et al., 2014	Malawi	susceptible	LIN-1
ERR163933	Guerra-Assuncao et al., 2014	Malawi	susceptible	LIN-4
ERR163934	Guerra-Assuncao et al., 2014	Malawi	susceptible	LIN-4
ERR163935	Guerra-Assuncao et al., 2014	Malawi	susceptible	LIN-1
ERR163936	Guerra-Assuncao et al., 2014	Malawi	susceptible	LIN-4
ERR163937	Guerra-Assuncao et al., 2014	Malawi	susceptible	LIN-4
ERR163939	Guerra-Assuncao et al., 2014	Malawi	susceptible	LIN-3
ERR163941	Guerra-Assuncao et al., 2014	Malawi	susceptible	LIN-4
ERR163942	Guerra-Assuncao et al., 2014	Malawi	susceptible	LIN-4
ERR163944	Guerra-Assuncao et al., 2014	Malawi	susceptible	LIN-4
ERR163946	Guerra-Assuncao et al., 2014	Malawi	susceptible	LIN-4
ERR163947	Guerra-Assuncao et al., 2014	Malawi	susceptible	LIN-1
ERR163949	Guerra-Assuncao et al., 2014	Malawi	susceptible	LIN-4
ERR163950	Guerra-Assuncao et al., 2014	Malawi	susceptible	LIN-4
ERR163951	Guerra-Assuncao et al., 2014	Malawi	susceptible	LIN-3
ERR163952	Guerra-Assuncao et al., 2014	Malawi	susceptible	LIN-1
ERR163954	Guerra-Assuncao et al., 2014	Malawi	susceptible	LIN-1
ERR163955	Guerra-Assuncao et al., 2014	Malawi	susceptible	LIN-4
ERR163956	Guerra-Assuncao et al., 2014	Malawi	susceptible	LIN-4
ERR163957	Guerra-Assuncao et al., 2014	Malawi	susceptible	LIN-4
ERR163959	Guerra-Assuncao et al., 2014	Malawi	susceptible	LIN-2
ERR163960	Guerra-Assuncao et al., 2014	Malawi	susceptible	LIN-4
ERR163963	Guerra-Assuncao et al., 2014	Malawi	susceptible	LIN-1
ERR163964	Guerra-Assuncao et al., 2014	Malawi	susceptible	LIN-4
ERR163965	Guerra-Assuncao et al., 2014	Malawi	susceptible	LIN-4
ERR163966	Guerra-Assuncao et al., 2014	Malawi	susceptible	LIN-3
ERR163967	Guerra-Assuncao et al., 2014	Malawi	susceptible	LIN-4
ERR163968	Guerra-Assuncao et al., 2014	Malawi	susceptible	LIN-4
ERR163969	Guerra-Assuncao et al., 2014	Malawi	susceptible	LIN-4
ERR163970	Guerra-Assuncao et al., 2014	Malawi	susceptible	LIN-4
ERR163972	Guerra-Assuncao et al., 2014	Malawi	susceptible	LIN-1
ERR163973	Guerra-Assuncao et al., 2014	Malawi	susceptible	LIN-3
ERR163974	Guerra-Assuncao et al., 2014	Malawi	susceptible	LIN-3
ERR163975	Guerra-Assuncao et al., 2014	Malawi	susceptible	LIN-4
ERR163977	Guerra-Assuncao et al., 2014	Malawi	susceptible	LIN-4
ERR163978	Guerra-Assuncao et al., 2014	Malawi	susceptible	LIN-3
ERR163979	Guerra-Assuncao et al., 2014	Malawi	susceptible	LIN-4
ERR163980	Guerra-Assuncao et al., 2014	Malawi	susceptible	LIN-1
ERR163981	Guerra-Assuncao et al., 2014	Malawi	susceptible	LIN-4
ERR163982	Guerra-Assuncao et al., 2014	Malawi	susceptible	LIN-1
ERR163983	Guerra-Assuncao et al., 2014	Malawi	susceptible	LIN-4
ERR163985	Guerra-Assuncao et al., 2014	Malawi	susceptible	LIN-4
ERR163987	Guerra-Assuncao et al., 2014	Malawi	susceptible	LIN-4
ERR163988	Guerra-Assuncao et al., 2014	Malawi	susceptible	LIN-4
ERR163989	Guerra-Assuncao et al., 2014	Malawi	susceptible	LIN-4
ERR163990	Guerra-Assuncao et al., 2014	Malawi	susceptible	LIN-2
ERR163991	Guerra-Assuncao et al., 2014	Malawi	susceptible	LIN-4
ERR163992	Guerra-Assuncao et al., 2014	Malawi	susceptible	LIN-4
ERR163993	Guerra-Assuncao et al., 2014	Malawi	susceptible	LIN-4
ERR163994	Guerra-Assuncao et al., 2014	Malawi	susceptible	LIN-1
ERR163995	Guerra-Assuncao et al., 2014	Malawi	susceptible	LIN-4
ERR163996	Guerra-Assuncao et al., 2014	Malawi	susceptible	LIN-4
ERR163998	Guerra-Assuncao et al., 2014	Malawi	susceptible	LIN-4
ERR163999	Guerra-Assuncao et al., 2014	Malawi	susceptible	LIN-4
ERR164000	Guerra-Assuncao et al., 2014	Malawi	susceptible	LIN-1
ERR164002	Guerra-Assuncao et al., 2014	Malawi	susceptible	LIN-1
ERR164003	Guerra-Assuncao et al., 2014	Malawi	susceptible	LIN-4
ERR164005	Guerra-Assuncao et al., 2014	Malawi	susceptible	LIN-1
ERR164006	Guerra-Assuncao et al., 2014	Malawi	susceptible	LIN-4
ERR164007	Guerra-Assuncao et al., 2014	Malawi	susceptible	LIN-4
ERR164008	Guerra-Assuncao et al., 2014	Malawi	susceptible	LIN-4
ERR164009	Guerra-Assuncao et al., 2014	Malawi	susceptible	LIN-4
ERR164010	Guerra-Assuncao et al., 2014	Malawi	susceptible	LIN-4
ERR164011	Guerra-Assuncao et al., 2014	Malawi	susceptible	LIN-3
ERR164012	Guerra-Assuncao et al., 2014	Malawi	susceptible	LIN-4
ERR164013	Guerra-Assuncao et al., 2014	Malawi	susceptible	LIN-4
ERR164014	Guerra-Assuncao et al., 2014	Malawi	susceptible	LIN-4
ERR164015	Guerra-Assuncao et al., 2014	Malawi	susceptible	LIN-4
ERR164016	Guerra-Assuncao et al., 2014	Malawi	susceptible	LIN-4
ERR164017	Guerra-Assuncao et al., 2014	Malawi	susceptible	LIN-4
ERR164018	Guerra-Assuncao et al., 2014	Malawi	susceptible	LIN-4
ERR164019	Guerra-Assuncao et al., 2014	Malawi	susceptible	LIN-1
ERR164020	Guerra-Assuncao et al., 2014	Malawi	susceptible	LIN-4
ERR164022	Guerra-Assuncao et al., 2014	Malawi	susceptible	LIN-4
ERR164023	Guerra-Assuncao et al., 2014	Malawi	susceptible	LIN-4
ERR176446	Guerra-Assuncao et al., 2014	Malawi	susceptible	LIN-1
ERR176447	Guerra-Assuncao et al., 2014	Malawi	susceptible	LIN-4
ERR176448	Guerra-Assuncao et al., 2014	Malawi	susceptible	LIN-4
ERR176449	Guerra-Assuncao et al., 2014	Malawi	susceptible	LIN-4
ERR176451	Guerra-Assuncao et al., 2014	Malawi	susceptible	LIN-4
ERR176452	Guerra-Assuncao et al., 2014	Malawi	susceptible	LIN-4
ERR176453	Guerra-Assuncao et al., 2014	Malawi	susceptible	LIN-1
ERR176454	Guerra-Assuncao et al., 2014	Malawi	susceptible	LIN-4
ERR176455	Guerra-Assuncao et al., 2014	Malawi	susceptible	LIN-3
ERR176456	Guerra-Assuncao et al., 2014	Malawi	susceptible	LIN-1
ERR176457	Guerra-Assuncao et al., 2014	Malawi	susceptible	LIN-4
ERR176458	Guerra-Assuncao et al., 2014	Malawi	susceptible	LIN-4
ERR176459	Guerra-Assuncao et al., 2014	Malawi	susceptible	LIN-4
ERR176461	Guerra-Assuncao et al., 2014	Malawi	susceptible	LIN-4
ERR176462	Guerra-Assuncao et al., 2014	Malawi	susceptible	LIN-4
ERR176464	Guerra-Assuncao et al., 2014	Malawi	susceptible	LIN-3
ERR176465	Guerra-Assuncao et al., 2014	Malawi	susceptible	LIN-4
ERR176466	Guerra-Assuncao et al., 2014	Malawi	susceptible	LIN-3
ERR176467	Guerra-Assuncao et al., 2014	Malawi	susceptible	LIN-4
ERR176469	Guerra-Assuncao et al., 2014	Malawi	susceptible	LIN-4
ERR176470	Guerra-Assuncao et al., 2014	Malawi	susceptible	LIN-4
ERR176471	Guerra-Assuncao et al., 2014	Malawi	susceptible	LIN-3
ERR176472	Guerra-Assuncao et al., 2014	Malawi	susceptible	LIN-4
ERR176473	Guerra-Assuncao et al., 2014	Malawi	susceptible	LIN-4
ERR176474	Guerra-Assuncao et al., 2014	Malawi	susceptible	LIN-4
ERR176476	Guerra-Assuncao et al., 2014	Malawi	susceptible	LIN-1
ERR176478	Guerra-Assuncao et al., 2014	Malawi	susceptible	LIN-4
ERR176479	Guerra-Assuncao et al., 2014	Malawi	susceptible	LIN-3
ERR176480	Guerra-Assuncao et al., 2014	Malawi	susceptible	LIN-4
ERR176481	Guerra-Assuncao et al., 2014	Malawi	susceptible	LIN-3
ERR176482	Guerra-Assuncao et al., 2014	Malawi	susceptible	LIN-4
ERR176483	Guerra-Assuncao et al., 2014	Malawi	susceptible	LIN-1
ERR176484	Guerra-Assuncao et al., 2014	Malawi	susceptible	LIN-4
ERR176485	Guerra-Assuncao et al., 2014	Malawi	susceptible	LIN-1
ERR176486	Guerra-Assuncao et al., 2014	Malawi	susceptible	LIN-4
ERR176487	Guerra-Assuncao et al., 2014	Malawi	susceptible	LIN-4
ERR176488	Guerra-Assuncao et al., 2014	Malawi	susceptible	LIN-4
ERR176490	Guerra-Assuncao et al., 2014	Malawi	susceptible	LIN-1
ERR176491	Guerra-Assuncao et al., 2014	Malawi	susceptible	LIN-1
ERR176492	Guerra-Assuncao et al., 2014	Malawi	susceptible	LIN-4
ERR176493	Guerra-Assuncao et al., 2014	Malawi	susceptible	LIN-4
ERR176494	Guerra-Assuncao et al., 2014	Malawi	susceptible	LIN-4
ERR176495	Guerra-Assuncao et al., 2014	Malawi	susceptible	LIN-4
ERR176496	Guerra-Assuncao et al., 2014	Malawi	susceptible	LIN-4
ERR176497	Guerra-Assuncao et al., 2014	Malawi	susceptible	LIN-3
ERR176498	Guerra-Assuncao et al., 2014	Malawi	susceptible	LIN-3
ERR176499	Guerra-Assuncao et al., 2014	Malawi	susceptible	LIN-4
ERR176500	Guerra-Assuncao et al., 2014	Malawi	susceptible	LIN-4
ERR176502	Guerra-Assuncao et al., 2014	Malawi	susceptible	LIN-4
ERR176503	Guerra-Assuncao et al., 2014	Malawi	susceptible	LIN-4
ERR176504	Guerra-Assuncao et al., 2014	Malawi	susceptible	LIN-3
ERR176505	Guerra-Assuncao et al., 2014	Malawi	susceptible	LIN-4
ERR176506	Guerra-Assuncao et al., 2014	Malawi	susceptible	LIN-4
ERR176507	Guerra-Assuncao et al., 2014	Malawi	susceptible	LIN-4
ERR176508	Guerra-Assuncao et al., 2014	Malawi	susceptible	LIN-4
ERR176509	Guerra-Assuncao et al., 2014	Malawi	susceptible	LIN-4
ERR176510	Guerra-Assuncao et al., 2014	Malawi	susceptible	LIN-4
ERR176511	Guerra-Assuncao et al., 2014	Malawi	susceptible	LIN-4
ERR176512	Guerra-Assuncao et al., 2014	Malawi	susceptible	LIN-4
ERR176514	Guerra-Assuncao et al., 2014	Malawi	susceptible	LIN-4
ERR176515	Guerra-Assuncao et al., 2014	Malawi	susceptible	LIN-4
ERR176516	Guerra-Assuncao et al., 2014	Malawi	susceptible	LIN-4
ERR176517	Guerra-Assuncao et al., 2014	Malawi	susceptible	LIN-1
ERR176519	Guerra-Assuncao et al., 2014	Malawi	susceptible	LIN-4
ERR176520	Guerra-Assuncao et al., 2014	Malawi	susceptible	LIN-4
ERR176521	Guerra-Assuncao et al., 2014	Malawi	susceptible	LIN-4
ERR176522	Guerra-Assuncao et al., 2014	Malawi	susceptible	LIN-4
ERR176524	Guerra-Assuncao et al., 2014	Malawi	susceptible	LIN-1
ERR176525	Guerra-Assuncao et al., 2014	Malawi	susceptible	LIN-4
ERR176526	Guerra-Assuncao et al., 2014	Malawi	susceptible	LIN-4
ERR176527	Guerra-Assuncao et al., 2014	Malawi	susceptible	LIN-4
ERR176528	Guerra-Assuncao et al., 2014	Malawi	susceptible	LIN-3
ERR176529	Guerra-Assuncao et al., 2014	Malawi	susceptible	LIN-4
ERR176531	Guerra-Assuncao et al., 2014	Malawi	susceptible	LIN-4
ERR176532	Guerra-Assuncao et al., 2014	Malawi	susceptible	LIN-4
ERR176533	Guerra-Assuncao et al., 2014	Malawi	susceptible	LIN-4
ERR176534	Guerra-Assuncao et al., 2014	Malawi	susceptible	LIN-4
ERR176535	Guerra-Assuncao et al., 2014	Malawi	susceptible	LIN-4
ERR176536	Guerra-Assuncao et al., 2014	Malawi	susceptible	LIN-4
ERR176537	Guerra-Assuncao et al., 2014	Malawi	susceptible	LIN-4
ERR176538	Guerra-Assuncao et al., 2014	Malawi	susceptible	LIN-4
ERR176539	Guerra-Assuncao et al., 2014	Malawi	susceptible	LIN-4
ERR176540	Guerra-Assuncao et al., 2014	Malawi	susceptible	LIN-4
ERR176541	Guerra-Assuncao et al., 2014	Malawi	susceptible	LIN-4
ERR176542	Guerra-Assuncao et al., 2014	Malawi	susceptible	LIN-4
ERR176544	Guerra-Assuncao et al., 2014	Malawi	susceptible	LIN-4
ERR176545	Guerra-Assuncao et al., 2014	Malawi	susceptible	LIN-4
ERR176546	Guerra-Assuncao et al., 2014	Malawi	susceptible	LIN-4
ERR176548	Guerra-Assuncao et al., 2014	Malawi	susceptible	LIN-4
ERR176550	Guerra-Assuncao et al., 2014	Malawi	susceptible	LIN-4
ERR176551	Guerra-Assuncao et al., 2014	Malawi	susceptible	LIN-4
ERR176552	Guerra-Assuncao et al., 2014	Malawi	susceptible	LIN-4
ERR176553	Guerra-Assuncao et al., 2014	Malawi	susceptible	LIN-4
ERR176558	Guerra-Assuncao et al., 2014	Malawi	susceptible	LIN-4
ERR176559	Guerra-Assuncao et al., 2014	Malawi	susceptible	LIN-4
ERR176561	Guerra-Assuncao et al., 2014	Malawi	susceptible	LIN-4
ERR176562	Guerra-Assuncao et al., 2014	Malawi	susceptible	LIN-4
ERR176563	Guerra-Assuncao et al., 2014	Malawi	susceptible	LIN-4
ERR176564	Guerra-Assuncao et al., 2014	Malawi	susceptible	LIN-1
ERR176565	Guerra-Assuncao et al., 2014	Malawi	susceptible	LIN-4
ERR176566	Guerra-Assuncao et al., 2014	Malawi	susceptible	LIN-4
ERR176567	Guerra-Assuncao et al., 2014	Malawi	susceptible	LIN-4
ERR176569	Guerra-Assuncao et al., 2014	Malawi	susceptible	LIN-4
ERR176570	Guerra-Assuncao et al., 2014	Malawi	susceptible	LIN-1
ERR176571	Guerra-Assuncao et al., 2014	Malawi	susceptible	LIN-4
ERR176572	Guerra-Assuncao et al., 2014	Malawi	susceptible	LIN-4
ERR176573	Guerra-Assuncao et al., 2014	Malawi	susceptible	LIN-4
ERR176574	Guerra-Assuncao et al., 2014	Malawi	susceptible	LIN-4
ERR176575	Guerra-Assuncao et al., 2014	Malawi	susceptible	LIN-4
ERR176577	Guerra-Assuncao et al., 2014	Malawi	susceptible	LIN-3
ERR176578	Guerra-Assuncao et al., 2014	Malawi	susceptible	LIN-4
ERR176579	Guerra-Assuncao et al., 2014	Malawi	susceptible	LIN-4
ERR176580	Guerra-Assuncao et al., 2014	Malawi	susceptible	LIN-4
ERR176581	Guerra-Assuncao et al., 2014	Malawi	susceptible	LIN-4
ERR176582	Guerra-Assuncao et al., 2014	Malawi	susceptible	LIN-4
ERR176583	Guerra-Assuncao et al., 2014	Malawi	susceptible	LIN-4
ERR176584	Guerra-Assuncao et al., 2014	Malawi	susceptible	LIN-4
ERR176585	Guerra-Assuncao et al., 2014	Malawi	susceptible	LIN-4
ERR176587	Guerra-Assuncao et al., 2014	Malawi	susceptible	LIN-4
ERR176588	Guerra-Assuncao et al., 2014	Malawi	susceptible	LIN-1
ERR176589	Guerra-Assuncao et al., 2014	Malawi	susceptible	LIN-4
ERR176590	Guerra-Assuncao et al., 2014	Malawi	susceptible	LIN-4
ERR176591	Guerra-Assuncao et al., 2014	Malawi	susceptible	LIN-4
ERR176592	Guerra-Assuncao et al., 2014	Malawi	susceptible	LIN-4
ERR176593	Guerra-Assuncao et al., 2014	Malawi	susceptible	LIN-4
ERR176594	Guerra-Assuncao et al., 2014	Malawi	susceptible	LIN-4
ERR176595	Guerra-Assuncao et al., 2014	Malawi	susceptible	LIN-4
ERR176596	Guerra-Assuncao et al., 2014	Malawi	susceptible	LIN-4
ERR176597	Guerra-Assuncao et al., 2014	Malawi	susceptible	LIN-1
ERR176598	Guerra-Assuncao et al., 2014	Malawi	susceptible	LIN-4
ERR176599	Guerra-Assuncao et al., 2014	Malawi	susceptible	LIN-4
ERR176600	Guerra-Assuncao et al., 2014	Malawi	susceptible	LIN-3
ERR176601	Guerra-Assuncao et al., 2014	Malawi	susceptible	LIN-3
ERR176602	Guerra-Assuncao et al., 2014	Malawi	susceptible	LIN-1
ERR176603	Guerra-Assuncao et al., 2014	Malawi	susceptible	LIN-3
ERR176604	Guerra-Assuncao et al., 2014	Malawi	susceptible	LIN-1
ERR176606	Guerra-Assuncao et al., 2014	Malawi	susceptible	LIN-2
ERR176607	Guerra-Assuncao et al., 2014	Malawi	susceptible	LIN-4
ERR176609	Guerra-Assuncao et al., 2014	Malawi	susceptible	LIN-4
ERR176610	Guerra-Assuncao et al., 2014	Malawi	susceptible	LIN-4
ERR176612	Guerra-Assuncao et al., 2014	Malawi	susceptible	LIN-4
ERR176613	Guerra-Assuncao et al., 2014	Malawi	susceptible	LIN-4
ERR176614	Guerra-Assuncao et al., 2014	Malawi	susceptible	LIN-4
ERR176615	Guerra-Assuncao et al., 2014	Malawi	susceptible	LIN-4
ERR176617	Guerra-Assuncao et al., 2014	Malawi	susceptible	LIN-4
ERR176618	Guerra-Assuncao et al., 2014	Malawi	susceptible	LIN-1
ERR176621	Guerra-Assuncao et al., 2014	Malawi	susceptible	LIN-4
ERR176622	Guerra-Assuncao et al., 2014	Malawi	susceptible	LIN-1
ERR176623	Guerra-Assuncao et al., 2014	Malawi	susceptible	LIN-4
ERR176624	Guerra-Assuncao et al., 2014	Malawi	susceptible	LIN-4
ERR176625	Guerra-Assuncao et al., 2014	Malawi	susceptible	LIN-4
ERR176626	Guerra-Assuncao et al., 2014	Malawi	susceptible	LIN-4
ERR176627	Guerra-Assuncao et al., 2014	Malawi	susceptible	LIN-4
ERR176628	Guerra-Assuncao et al., 2014	Malawi	susceptible	LIN-4
ERR176630	Guerra-Assuncao et al., 2014	Malawi	susceptible	LIN-1
ERR176632	Guerra-Assuncao et al., 2014	Malawi	susceptible	LIN-4
ERR176633	Guerra-Assuncao et al., 2014	Malawi	susceptible	LIN-4
ERR176634	Guerra-Assuncao et al., 2014	Malawi	susceptible	LIN-4
ERR176635	Guerra-Assuncao et al., 2014	Malawi	susceptible	LIN-4
ERR176636	Guerra-Assuncao et al., 2014	Malawi	susceptible	LIN-4
ERR176637	Guerra-Assuncao et al., 2014	Malawi	susceptible	LIN-1
ERR176638	Guerra-Assuncao et al., 2014	Malawi	susceptible	LIN-4
ERR176639	Guerra-Assuncao et al., 2014	Malawi	susceptible	LIN-4
ERR176640	Guerra-Assuncao et al., 2014	Malawi	susceptible	LIN-4
ERR176641	Guerra-Assuncao et al., 2014	Malawi	susceptible	LIN-2
ERR176642	Guerra-Assuncao et al., 2014	Malawi	susceptible	LIN-4
ERR176644	Guerra-Assuncao et al., 2014	Malawi	susceptible	LIN-4
ERR176645	Guerra-Assuncao et al., 2014	Malawi	susceptible	LIN-4
ERR176647	Guerra-Assuncao et al., 2014	Malawi	susceptible	LIN-4
ERR176648	Guerra-Assuncao et al., 2014	Malawi	susceptible	LIN-3
ERR176649	Guerra-Assuncao et al., 2014	Malawi	susceptible	LIN-4
ERR176653	Guerra-Assuncao et al., 2014	Malawi	susceptible	LIN-4
ERR176654	Guerra-Assuncao et al., 2014	Malawi	susceptible	LIN-1
ERR176655	Guerra-Assuncao et al., 2014	Malawi	susceptible	LIN-4
ERR176656	Guerra-Assuncao et al., 2014	Malawi	susceptible	LIN-4
ERR176657	Guerra-Assuncao et al., 2014	Malawi	susceptible	LIN-3
ERR176659	Guerra-Assuncao et al., 2014	Malawi	susceptible	LIN-4
ERR176660	Guerra-Assuncao et al., 2014	Malawi	susceptible	LIN-4
ERR176661	Guerra-Assuncao et al., 2014	Malawi	susceptible	LIN-1
ERR176662	Guerra-Assuncao et al., 2014	Malawi	susceptible	LIN-3
ERR176663	Guerra-Assuncao et al., 2014	Malawi	susceptible	LIN-4
ERR176664	Guerra-Assuncao et al., 2014	Malawi	susceptible	LIN-4
ERR176665	Guerra-Assuncao et al., 2014	Malawi	susceptible	LIN-4
ERR176666	Guerra-Assuncao et al., 2014	Malawi	susceptible	LIN-4
ERR176667	Guerra-Assuncao et al., 2014	Malawi	susceptible	LIN-4
ERR176668	Guerra-Assuncao et al., 2014	Malawi	susceptible	LIN-3
ERR176669	Guerra-Assuncao et al., 2014	Malawi	susceptible	LIN-4
ERR176670	Guerra-Assuncao et al., 2014	Malawi	susceptible	LIN-3
ERR176671	Guerra-Assuncao et al., 2014	Malawi	susceptible	LIN-4
ERR176672	Guerra-Assuncao et al., 2014	Malawi	susceptible	LIN-4
ERR176673	Guerra-Assuncao et al., 2014	Malawi	susceptible	LIN-4
ERR176674	Guerra-Assuncao et al., 2014	Malawi	susceptible	LIN-3
ERR176675	Guerra-Assuncao et al., 2014	Malawi	susceptible	LIN-4
ERR176676	Guerra-Assuncao et al., 2014	Malawi	susceptible	LIN-3
ERR176677	Guerra-Assuncao et al., 2014	Malawi	susceptible	LIN-1
ERR176678	Guerra-Assuncao et al., 2014	Malawi	susceptible	LIN-4
ERR176679	Guerra-Assuncao et al., 2014	Malawi	susceptible	LIN-4
ERR176680	Guerra-Assuncao et al., 2014	Malawi	susceptible	LIN-4
ERR176681	Guerra-Assuncao et al., 2014	Malawi	susceptible	LIN-4
ERR176682	Guerra-Assuncao et al., 2014	Malawi	susceptible	LIN-4
ERR176683	Guerra-Assuncao et al., 2014	Malawi	susceptible	LIN-4
ERR176684	Guerra-Assuncao et al., 2014	Malawi	susceptible	LIN-4
ERR176685	Guerra-Assuncao et al., 2014	Malawi	susceptible	LIN-4
ERR176686	Guerra-Assuncao et al., 2014	Malawi	susceptible	LIN-4
ERR176687	Guerra-Assuncao et al., 2014	Malawi	susceptible	LIN-4
ERR176688	Guerra-Assuncao et al., 2014	Malawi	susceptible	LIN-4
ERR176689	Guerra-Assuncao et al., 2014	Malawi	susceptible	LIN-1
ERR176690	Guerra-Assuncao et al., 2014	Malawi	susceptible	LIN-4
ERR176691	Guerra-Assuncao et al., 2014	Malawi	susceptible	LIN-4
ERR176692	Guerra-Assuncao et al., 2014	Malawi	susceptible	LIN-4
ERR176693	Guerra-Assuncao et al., 2014	Malawi	susceptible	LIN-4
ERR176694	Guerra-Assuncao et al., 2014	Malawi	susceptible	LIN-4
ERR176695	Guerra-Assuncao et al., 2014	Malawi	susceptible	LIN-4
ERR176697	Guerra-Assuncao et al., 2014	Malawi	susceptible	LIN-4
ERR176698	Guerra-Assuncao et al., 2014	Malawi	susceptible	LIN-4
ERR176699	Guerra-Assuncao et al., 2014	Malawi	susceptible	LIN-4
ERR176700	Guerra-Assuncao et al., 2014	Malawi	susceptible	LIN-4
ERR176701	Guerra-Assuncao et al., 2014	Malawi	susceptible	LIN-4
ERR176702	Guerra-Assuncao et al., 2014	Malawi	susceptible	LIN-4
ERR176703	Guerra-Assuncao et al., 2014	Malawi	susceptible	LIN-4
ERR176704	Guerra-Assuncao et al., 2014	Malawi	susceptible	LIN-3
ERR176705	Guerra-Assuncao et al., 2014	Malawi	susceptible	LIN-4
ERR176706	Guerra-Assuncao et al., 2014	Malawi	susceptible	LIN-4
ERR176708	Guerra-Assuncao et al., 2014	Malawi	susceptible	LIN-4
ERR176710	Guerra-Assuncao et al., 2014	Malawi	susceptible	LIN-4
ERR176711	Guerra-Assuncao et al., 2014	Malawi	susceptible	LIN-4
ERR176712	Guerra-Assuncao et al., 2014	Malawi	susceptible	LIN-1
ERR176713	Guerra-Assuncao et al., 2014	Malawi	susceptible	LIN-1
ERR176714	Guerra-Assuncao et al., 2014	Malawi	susceptible	LIN-4
ERR176715	Guerra-Assuncao et al., 2014	Malawi	susceptible	LIN-4
ERR176717	Guerra-Assuncao et al., 2014	Malawi	susceptible	LIN-4
ERR176718	Guerra-Assuncao et al., 2014	Malawi	susceptible	LIN-2
ERR176719	Guerra-Assuncao et al., 2014	Malawi	susceptible	LIN-4
ERR176720	Guerra-Assuncao et al., 2014	Malawi	susceptible	LIN-4
ERR176721	Guerra-Assuncao et al., 2014	Malawi	susceptible	LIN-4
ERR176722	Guerra-Assuncao et al., 2014	Malawi	susceptible	LIN-4
ERR176723	Guerra-Assuncao et al., 2014	Malawi	susceptible	LIN-1
ERR176724	Guerra-Assuncao et al., 2014	Malawi	susceptible	LIN-4
ERR176725	Guerra-Assuncao et al., 2014	Malawi	susceptible	LIN-4
ERR176726	Guerra-Assuncao et al., 2014	Malawi	susceptible	LIN-1
ERR176727	Guerra-Assuncao et al., 2014	Malawi	susceptible	LIN-4
ERR176728	Guerra-Assuncao et al., 2014	Malawi	susceptible	LIN-4
ERR176729	Guerra-Assuncao et al., 2014	Malawi	susceptible	LIN-4
ERR176730	Guerra-Assuncao et al., 2014	Malawi	susceptible	LIN-4
ERR176731	Guerra-Assuncao et al., 2014	Malawi	susceptible	LIN-3
ERR176732	Guerra-Assuncao et al., 2014	Malawi	susceptible	LIN-4
ERR176733	Guerra-Assuncao et al., 2014	Malawi	susceptible	LIN-4
ERR176734	Guerra-Assuncao et al., 2014	Malawi	susceptible	LIN-4
ERR176735	Guerra-Assuncao et al., 2014	Malawi	susceptible	LIN-1
ERR176737	Guerra-Assuncao et al., 2014	Malawi	susceptible	LIN-4
ERR176738	Guerra-Assuncao et al., 2014	Malawi	susceptible	LIN-3
ERR176739	Guerra-Assuncao et al., 2014	Malawi	susceptible	LIN-4
ERR176742	Guerra-Assuncao et al., 2014	Malawi	susceptible	LIN-4
ERR176743	Guerra-Assuncao et al., 2014	Malawi	susceptible	LIN-4
ERR176744	Guerra-Assuncao et al., 2014	Malawi	susceptible	LIN-4
ERR176745	Guerra-Assuncao et al., 2014	Malawi	susceptible	LIN-4
ERR176746	Guerra-Assuncao et al., 2014	Malawi	susceptible	LIN-4
ERR176747	Guerra-Assuncao et al., 2014	Malawi	susceptible	LIN-1
ERR176748	Guerra-Assuncao et al., 2014	Malawi	susceptible	LIN-4
ERR176750	Guerra-Assuncao et al., 2014	Malawi	susceptible	LIN-4
ERR176753	Guerra-Assuncao et al., 2014	Malawi	susceptible	LIN-4
ERR176754	Guerra-Assuncao et al., 2014	Malawi	susceptible	LIN-4
ERR176755	Guerra-Assuncao et al., 2014	Malawi	susceptible	LIN-4
ERR176756	Guerra-Assuncao et al., 2014	Malawi	susceptible	LIN-4
ERR176757	Guerra-Assuncao et al., 2014	Malawi	susceptible	LIN-1
ERR176758	Guerra-Assuncao et al., 2014	Malawi	susceptible	LIN-4
ERR176759	Guerra-Assuncao et al., 2014	Malawi	susceptible	LIN-2
ERR176760	Guerra-Assuncao et al., 2014	Malawi	susceptible	LIN-4
ERR176761	Guerra-Assuncao et al., 2014	Malawi	susceptible	LIN-4
ERR176762	Guerra-Assuncao et al., 2014	Malawi	susceptible	LIN-4
ERR176763	Guerra-Assuncao et al., 2014	Malawi	susceptible	LIN-4
ERR176764	Guerra-Assuncao et al., 2014	Malawi	susceptible	LIN-4
ERR176767	Guerra-Assuncao et al., 2014	Malawi	susceptible	LIN-4
ERR176768	Guerra-Assuncao et al., 2014	Malawi	susceptible	LIN-4
ERR176769	Guerra-Assuncao et al., 2014	Malawi	susceptible	LIN-4
ERR176770	Guerra-Assuncao et al., 2014	Malawi	susceptible	LIN-1
ERR176772	Guerra-Assuncao et al., 2014	Malawi	susceptible	LIN-4
ERR176773	Guerra-Assuncao et al., 2014	Malawi	susceptible	LIN-4
ERR176774	Guerra-Assuncao et al., 2014	Malawi	susceptible	LIN-4
ERR176775	Guerra-Assuncao et al., 2014	Malawi	susceptible	LIN-1
ERR176776	Guerra-Assuncao et al., 2014	Malawi	susceptible	LIN-4
ERR176777	Guerra-Assuncao et al., 2014	Malawi	susceptible	LIN-4
ERR176782	Guerra-Assuncao et al., 2014	Malawi	susceptible	LIN-4
ERR176783	Guerra-Assuncao et al., 2014	Malawi	susceptible	LIN-4
ERR176784	Guerra-Assuncao et al., 2014	Malawi	susceptible	LIN-4
ERR176785	Guerra-Assuncao et al., 2014	Malawi	susceptible	LIN-3
ERR176786	Guerra-Assuncao et al., 2014	Malawi	susceptible	LIN-4
ERR176787	Guerra-Assuncao et al., 2014	Malawi	susceptible	LIN-4
ERR176788	Guerra-Assuncao et al., 2014	Malawi	susceptible	LIN-1
ERR176789	Guerra-Assuncao et al., 2014	Malawi	susceptible	LIN-4
ERR176790	Guerra-Assuncao et al., 2014	Malawi	susceptible	LIN-4
ERR176791	Guerra-Assuncao et al., 2014	Malawi	susceptible	LIN-3
ERR176792	Guerra-Assuncao et al., 2014	Malawi	susceptible	LIN-4
ERR176794	Guerra-Assuncao et al., 2014	Malawi	susceptible	LIN-2
ERR176795	Guerra-Assuncao et al., 2014	Malawi	susceptible	LIN-1
ERR176796	Guerra-Assuncao et al., 2014	Malawi	susceptible	LIN-1
ERR176797	Guerra-Assuncao et al., 2014	Malawi	susceptible	LIN-4
ERR176798	Guerra-Assuncao et al., 2014	Malawi	susceptible	LIN-4
ERR176799	Guerra-Assuncao et al., 2014	Malawi	susceptible	LIN-2
ERR176800	Guerra-Assuncao et al., 2014	Malawi	susceptible	LIN-1
ERR176801	Guerra-Assuncao et al., 2014	Malawi	susceptible	LIN-4
ERR176802	Guerra-Assuncao et al., 2014	Malawi	susceptible	LIN-4
ERR176803	Guerra-Assuncao et al., 2014	Malawi	susceptible	LIN-4
ERR176804	Guerra-Assuncao et al., 2014	Malawi	susceptible	LIN-4
ERR176805	Guerra-Assuncao et al., 2014	Malawi	susceptible	LIN-4
ERR176806	Guerra-Assuncao et al., 2014	Malawi	susceptible	LIN-4
ERR176808	Guerra-Assuncao et al., 2014	Malawi	susceptible	LIN-4
ERR176810	Guerra-Assuncao et al., 2014	Malawi	susceptible	LIN-4
ERR176812	Guerra-Assuncao et al., 2014	Malawi	susceptible	LIN-4
ERR176814	Guerra-Assuncao et al., 2014	Malawi	susceptible	LIN-4
ERR176815	Guerra-Assuncao et al., 2014	Malawi	susceptible	LIN-4
ERR176816	Guerra-Assuncao et al., 2014	Malawi	susceptible	LIN-4
ERR176817	Guerra-Assuncao et al., 2014	Malawi	susceptible	LIN-4
ERR176818	Guerra-Assuncao et al., 2014	Malawi	susceptible	LIN-4
ERR176820	Guerra-Assuncao et al., 2014	Malawi	susceptible	LIN-4
ERR176821	Guerra-Assuncao et al., 2014	Malawi	susceptible	LIN-4
ERR176822	Guerra-Assuncao et al., 2014	Malawi	susceptible	LIN-4
ERR176823	Guerra-Assuncao et al., 2014	Malawi	susceptible	LIN-1
ERR176824	Guerra-Assuncao et al., 2014	Malawi	susceptible	LIN-4
ERR176825	Guerra-Assuncao et al., 2014	Malawi	susceptible	LIN-3
ERR176826	Guerra-Assuncao et al., 2014	Malawi	susceptible	LIN-4
ERR176827	Guerra-Assuncao et al., 2014	Malawi	susceptible	LIN-1
ERR176829	Guerra-Assuncao et al., 2014	Malawi	susceptible	LIN-4
ERR181674	Guerra-Assuncao et al., 2014	Malawi	susceptible	LIN-4
ERR181675	Guerra-Assuncao et al., 2014	Malawi	susceptible	LIN-4
ERR181676	Guerra-Assuncao et al., 2014	Malawi	susceptible	LIN-4
ERR181677	Guerra-Assuncao et al., 2014	Malawi	susceptible	LIN-4
ERR181678	Guerra-Assuncao et al., 2014	Malawi	susceptible	LIN-4
ERR181679	Guerra-Assuncao et al., 2014	Malawi	susceptible	LIN-4
ERR181681	Guerra-Assuncao et al., 2014	Malawi	susceptible	LIN-4
ERR181682	Guerra-Assuncao et al., 2014	Malawi	susceptible	LIN-1
ERR181683	Guerra-Assuncao et al., 2014	Malawi	susceptible	LIN-3
ERR181684	Guerra-Assuncao et al., 2014	Malawi	susceptible	LIN-4
ERR181685	Guerra-Assuncao et al., 2014	Malawi	susceptible	LIN-4
ERR181687	Guerra-Assuncao et al., 2014	Malawi	susceptible	LIN-1
ERR181688	Guerra-Assuncao et al., 2014	Malawi	susceptible	LIN-4
ERR181689	Guerra-Assuncao et al., 2014	Malawi	susceptible	LIN-4
ERR181690	Guerra-Assuncao et al., 2014	Malawi	susceptible	LIN-4
ERR181691	Guerra-Assuncao et al., 2014	Malawi	susceptible	LIN-4
ERR181693	Guerra-Assuncao et al., 2014	Malawi	susceptible	LIN-3
ERR181694	Guerra-Assuncao et al., 2014	Malawi	susceptible	LIN-4
ERR181696	Guerra-Assuncao et al., 2014	Malawi	susceptible	LIN-2
ERR181697	Guerra-Assuncao et al., 2014	Malawi	susceptible	LIN-4
ERR181698	Guerra-Assuncao et al., 2014	Malawi	susceptible	LIN-4
ERR181699	Guerra-Assuncao et al., 2014	Malawi	susceptible	LIN-4
ERR181700	Guerra-Assuncao et al., 2014	Malawi	susceptible	LIN-4
ERR181701	Guerra-Assuncao et al., 2014	Malawi	susceptible	LIN-4
ERR181702	Guerra-Assuncao et al., 2014	Malawi	susceptible	LIN-4
ERR181703	Guerra-Assuncao et al., 2014	Malawi	susceptible	LIN-3
ERR181704	Guerra-Assuncao et al., 2014	Malawi	susceptible	LIN-4
ERR181706	Guerra-Assuncao et al., 2014	Malawi	susceptible	LIN-4
ERR181707	Guerra-Assuncao et al., 2014	Malawi	susceptible	LIN-3
ERR181709	Guerra-Assuncao et al., 2014	Malawi	susceptible	LIN-4
ERR181711	Guerra-Assuncao et al., 2014	Malawi	susceptible	LIN-4
ERR181713	Guerra-Assuncao et al., 2014	Malawi	susceptible	LIN-3
ERR181714	Guerra-Assuncao et al., 2014	Malawi	susceptible	LIN-4
ERR181715	Guerra-Assuncao et al., 2014	Malawi	susceptible	LIN-3
ERR181717	Guerra-Assuncao et al., 2014	Malawi	susceptible	LIN-3
ERR181718	Guerra-Assuncao et al., 2014	Malawi	susceptible	LIN-3
ERR181719	Guerra-Assuncao et al., 2014	Malawi	susceptible	LIN-4
ERR181720	Guerra-Assuncao et al., 2014	Malawi	susceptible	LIN-4
ERR181721	Guerra-Assuncao et al., 2014	Malawi	susceptible	LIN-4
ERR181722	Guerra-Assuncao et al., 2014	Malawi	susceptible	LIN-2
ERR181723	Guerra-Assuncao et al., 2014	Malawi	susceptible	LIN-1
ERR181724	Guerra-Assuncao et al., 2014	Malawi	susceptible	LIN-1
ERR181725	Guerra-Assuncao et al., 2014	Malawi	susceptible	LIN-1
ERR181726	Guerra-Assuncao et al., 2014	Malawi	susceptible	LIN-4
ERR181728	Guerra-Assuncao et al., 2014	Malawi	susceptible	LIN-1
ERR181729	Guerra-Assuncao et al., 2014	Malawi	susceptible	LIN-4
ERR181730	Guerra-Assuncao et al., 2014	Malawi	susceptible	LIN-4
ERR181731	Guerra-Assuncao et al., 2014	Malawi	susceptible	LIN-4
ERR181732	Guerra-Assuncao et al., 2014	Malawi	susceptible	LIN-4
ERR181733	Guerra-Assuncao et al., 2014	Malawi	susceptible	LIN-4
ERR181734	Guerra-Assuncao et al., 2014	Malawi	susceptible	LIN-4
ERR181735	Guerra-Assuncao et al., 2014	Malawi	susceptible	LIN-4
ERR181736	Guerra-Assuncao et al., 2014	Malawi	susceptible	LIN-3
ERR181737	Guerra-Assuncao et al., 2014	Malawi	susceptible	LIN-4
ERR181738	Guerra-Assuncao et al., 2014	Malawi	susceptible	LIN-4
ERR181739	Guerra-Assuncao et al., 2014	Malawi	susceptible	LIN-1
ERR181740	Guerra-Assuncao et al., 2014	Malawi	susceptible	LIN-4
ERR181741	Guerra-Assuncao et al., 2014	Malawi	susceptible	LIN-4
ERR181742	Guerra-Assuncao et al., 2014	Malawi	susceptible	LIN-4
ERR181743	Guerra-Assuncao et al., 2014	Malawi	susceptible	LIN-4
ERR181745	Guerra-Assuncao et al., 2014	Malawi	susceptible	LIN-4
ERR181746	Guerra-Assuncao et al., 2014	Malawi	susceptible	LIN-4
ERR181747	Guerra-Assuncao et al., 2014	Malawi	susceptible	LIN-4
ERR181748	Guerra-Assuncao et al., 2014	Malawi	susceptible	LIN-4
ERR181749	Guerra-Assuncao et al., 2014	Malawi	susceptible	LIN-4
ERR181750	Guerra-Assuncao et al., 2014	Malawi	susceptible	LIN-1
ERR181752	Guerra-Assuncao et al., 2014	Malawi	susceptible	LIN-1
ERR181753	Guerra-Assuncao et al., 2014	Malawi	susceptible	LIN-4
ERR181754	Guerra-Assuncao et al., 2014	Malawi	susceptible	LIN-4
ERR181755	Guerra-Assuncao et al., 2014	Malawi	susceptible	LIN-4
ERR181756	Guerra-Assuncao et al., 2014	Malawi	susceptible	LIN-4
ERR181757	Guerra-Assuncao et al., 2014	Malawi	susceptible	LIN-4
ERR181758	Guerra-Assuncao et al., 2014	Malawi	susceptible	LIN-4
ERR181759	Guerra-Assuncao et al., 2014	Malawi	susceptible	LIN-4
ERR181760	Guerra-Assuncao et al., 2014	Malawi	susceptible	LIN-1
ERR181761	Guerra-Assuncao et al., 2014	Malawi	susceptible	LIN-4
ERR181764	Guerra-Assuncao et al., 2014	Malawi	susceptible	LIN-4
ERR181767	Guerra-Assuncao et al., 2014	Malawi	susceptible	LIN-4
ERR181768	Guerra-Assuncao et al., 2014	Malawi	susceptible	LIN-4
ERR181769	Guerra-Assuncao et al., 2014	Malawi	susceptible	LIN-2
ERR181770	Guerra-Assuncao et al., 2014	Malawi	susceptible	LIN-3
ERR181771	Guerra-Assuncao et al., 2014	Malawi	susceptible	LIN-3
ERR181772	Guerra-Assuncao et al., 2014	Malawi	susceptible	LIN-4
ERR181774	Guerra-Assuncao et al., 2014	Malawi	susceptible	LIN-4
ERR181775	Guerra-Assuncao et al., 2014	Malawi	susceptible	LIN-1
ERR181776	Guerra-Assuncao et al., 2014	Malawi	susceptible	LIN-4
ERR181777	Guerra-Assuncao et al., 2014	Malawi	susceptible	LIN-4
ERR181778	Guerra-Assuncao et al., 2014	Malawi	susceptible	LIN-1
ERR181779	Guerra-Assuncao et al., 2014	Malawi	susceptible	LIN-1
ERR181780	Guerra-Assuncao et al., 2014	Malawi	susceptible	LIN-4
ERR181781	Guerra-Assuncao et al., 2014	Malawi	susceptible	LIN-4
ERR181783	Guerra-Assuncao et al., 2014	Malawi	susceptible	LIN-4
ERR181786	Guerra-Assuncao et al., 2014	Malawi	susceptible	LIN-4
ERR181787	Guerra-Assuncao et al., 2014	Malawi	susceptible	LIN-4
ERR181788	Guerra-Assuncao et al., 2014	Malawi	susceptible	LIN-4
ERR181789	Guerra-Assuncao et al., 2014	Malawi	susceptible	LIN-4
ERR181790	Guerra-Assuncao et al., 2014	Malawi	susceptible	LIN-3
ERR181791	Guerra-Assuncao et al., 2014	Malawi	susceptible	LIN-4
ERR181792	Guerra-Assuncao et al., 2014	Malawi	susceptible	LIN-4
ERR181794	Guerra-Assuncao et al., 2014	Malawi	susceptible	LIN-1
ERR181795	Guerra-Assuncao et al., 2014	Malawi	susceptible	LIN-1
ERR181796	Guerra-Assuncao et al., 2014	Malawi	susceptible	LIN-4
ERR181798	Guerra-Assuncao et al., 2014	Malawi	susceptible	LIN-1
ERR181799	Guerra-Assuncao et al., 2014	Malawi	susceptible	LIN-1
ERR181800	Guerra-Assuncao et al., 2014	Malawi	susceptible	LIN-3
ERR181801	Guerra-Assuncao et al., 2014	Malawi	susceptible	LIN-4
ERR181802	Guerra-Assuncao et al., 2014	Malawi	susceptible	LIN-3
ERR181803	Guerra-Assuncao et al., 2014	Malawi	susceptible	LIN-4
ERR181804	Guerra-Assuncao et al., 2014	Malawi	susceptible	LIN-3
ERR181805	Guerra-Assuncao et al., 2014	Malawi	susceptible	LIN-4
ERR181807	Guerra-Assuncao et al., 2014	Malawi	susceptible	LIN-1
ERR181809	Guerra-Assuncao et al., 2014	Malawi	susceptible	LIN-4
ERR181810	Guerra-Assuncao et al., 2014	Malawi	susceptible	LIN-1
ERR181812	Guerra-Assuncao et al., 2014	Malawi	susceptible	LIN-3
ERR181814	Guerra-Assuncao et al., 2014	Malawi	susceptible	LIN-4
ERR181816	Guerra-Assuncao et al., 2014	Malawi	susceptible	LIN-4
ERR181817	Guerra-Assuncao et al., 2014	Malawi	susceptible	LIN-3
ERR181818	Guerra-Assuncao et al., 2014	Malawi	susceptible	LIN-4
ERR181819	Guerra-Assuncao et al., 2014	Malawi	susceptible	LIN-1
ERR181820	Guerra-Assuncao et al., 2014	Malawi	susceptible	LIN-1
ERR181821	Guerra-Assuncao et al., 2014	Malawi	susceptible	LIN-2
ERR181822	Guerra-Assuncao et al., 2014	Malawi	susceptible	LIN-4
ERR181823	Guerra-Assuncao et al., 2014	Malawi	susceptible	LIN-4
ERR181825	Guerra-Assuncao et al., 2014	Malawi	susceptible	LIN-4
ERR181829	Guerra-Assuncao et al., 2014	Malawi	susceptible	LIN-4
ERR181830	Guerra-Assuncao et al., 2014	Malawi	susceptible	LIN-3
ERR181831	Guerra-Assuncao et al., 2014	Malawi	susceptible	LIN-1
ERR181832	Guerra-Assuncao et al., 2014	Malawi	susceptible	LIN-4
ERR181833	Guerra-Assuncao et al., 2014	Malawi	susceptible	LIN-4
ERR181834	Guerra-Assuncao et al., 2014	Malawi	susceptible	LIN-4
ERR181835	Guerra-Assuncao et al., 2014	Malawi	susceptible	LIN-4
ERR181836	Guerra-Assuncao et al., 2014	Malawi	susceptible	LIN-4
ERR181837	Guerra-Assuncao et al., 2014	Malawi	susceptible	LIN-4
ERR181838	Guerra-Assuncao et al., 2014	Malawi	susceptible	LIN-4
ERR181839	Guerra-Assuncao et al., 2014	Malawi	susceptible	LIN-4
ERR181840	Guerra-Assuncao et al., 2014	Malawi	susceptible	LIN-4
ERR181841	Guerra-Assuncao et al., 2014	Malawi	susceptible	LIN-4
ERR181842	Guerra-Assuncao et al., 2014	Malawi	susceptible	LIN-3
ERR181843	Guerra-Assuncao et al., 2014	Malawi	susceptible	LIN-4
ERR181844	Guerra-Assuncao et al., 2014	Malawi	susceptible	LIN-1
ERR181845	Guerra-Assuncao et al., 2014	Malawi	susceptible	LIN-4
ERR181846	Guerra-Assuncao et al., 2014	Malawi	susceptible	LIN-3
ERR181847	Guerra-Assuncao et al., 2014	Malawi	susceptible	LIN-4
ERR181848	Guerra-Assuncao et al., 2014	Malawi	susceptible	LIN-4
ERR181850	Guerra-Assuncao et al., 2014	Malawi	susceptible	LIN-4
ERR181851	Guerra-Assuncao et al., 2014	Malawi	susceptible	LIN-3
ERR181853	Guerra-Assuncao et al., 2014	Malawi	susceptible	LIN-4
ERR181854	Guerra-Assuncao et al., 2014	Malawi	susceptible	LIN-3
ERR181856	Guerra-Assuncao et al., 2014	Malawi	susceptible	LIN-3
ERR181858	Guerra-Assuncao et al., 2014	Malawi	susceptible	LIN-4
ERR181859	Guerra-Assuncao et al., 2014	Malawi	susceptible	LIN-4
ERR181860	Guerra-Assuncao et al., 2014	Malawi	susceptible	LIN-1
ERR181862	Guerra-Assuncao et al., 2014	Malawi	susceptible	LIN-1
ERR181863	Guerra-Assuncao et al., 2014	Malawi	susceptible	LIN-3
ERR181864	Guerra-Assuncao et al., 2014	Malawi	susceptible	LIN-3
ERR181865	Guerra-Assuncao et al., 2014	Malawi	susceptible	LIN-4
ERR181866	Guerra-Assuncao et al., 2014	Malawi	susceptible	LIN-2
ERR181867	Guerra-Assuncao et al., 2014	Malawi	susceptible	LIN-4
ERR181868	Guerra-Assuncao et al., 2014	Malawi	susceptible	LIN-4
ERR181870	Guerra-Assuncao et al., 2014	Malawi	susceptible	LIN-2
ERR181871	Guerra-Assuncao et al., 2014	Malawi	susceptible	LIN-4
ERR181872	Guerra-Assuncao et al., 2014	Malawi	susceptible	LIN-4
ERR181873	Guerra-Assuncao et al., 2014	Malawi	susceptible	LIN-4
ERR181874	Guerra-Assuncao et al., 2014	Malawi	susceptible	LIN-4
ERR181875	Guerra-Assuncao et al., 2014	Malawi	susceptible	LIN-4
ERR181876	Guerra-Assuncao et al., 2014	Malawi	susceptible	LIN-4
ERR181877	Guerra-Assuncao et al., 2014	Malawi	susceptible	LIN-4
ERR181878	Guerra-Assuncao et al., 2014	Malawi	susceptible	LIN-4
ERR181879	Guerra-Assuncao et al., 2014	Malawi	susceptible	LIN-4
ERR181880	Guerra-Assuncao et al., 2014	Malawi	susceptible	LIN-4
ERR181882	Guerra-Assuncao et al., 2014	Malawi	susceptible	LIN-4
ERR181883	Guerra-Assuncao et al., 2014	Malawi	susceptible	LIN-3
ERR181884	Guerra-Assuncao et al., 2014	Malawi	susceptible	LIN-4
ERR181885	Guerra-Assuncao et al., 2014	Malawi	susceptible	LIN-4
ERR181886	Guerra-Assuncao et al., 2014	Malawi	susceptible	LIN-4
ERR181888	Guerra-Assuncao et al., 2014	Malawi	susceptible	LIN-4
ERR181889	Guerra-Assuncao et al., 2014	Malawi	susceptible	LIN-4
ERR181891	Guerra-Assuncao et al., 2014	Malawi	susceptible	LIN-2
ERR181892	Guerra-Assuncao et al., 2014	Malawi	susceptible	LIN-3
ERR181893	Guerra-Assuncao et al., 2014	Malawi	susceptible	LIN-3
ERR181894	Guerra-Assuncao et al., 2014	Malawi	susceptible	LIN-4
ERR181895	Guerra-Assuncao et al., 2014	Malawi	susceptible	LIN-4
ERR181898	Guerra-Assuncao et al., 2014	Malawi	susceptible	LIN-2
ERR181899	Guerra-Assuncao et al., 2014	Malawi	susceptible	LIN-4
ERR181900	Guerra-Assuncao et al., 2014	Malawi	susceptible	LIN-4
ERR181901	Guerra-Assuncao et al., 2014	Malawi	susceptible	LIN-4
ERR181902	Guerra-Assuncao et al., 2014	Malawi	susceptible	LIN-4
ERR181903	Guerra-Assuncao et al., 2014	Malawi	susceptible	LIN-4
ERR181904	Guerra-Assuncao et al., 2014	Malawi	susceptible	LIN-4
ERR181905	Guerra-Assuncao et al., 2014	Malawi	susceptible	LIN-2
ERR181906	Guerra-Assuncao et al., 2014	Malawi	susceptible	LIN-3
ERR181908	Guerra-Assuncao et al., 2014	Malawi	susceptible	LIN-4
ERR181910	Guerra-Assuncao et al., 2014	Malawi	susceptible	LIN-1
ERR181911	Guerra-Assuncao et al., 2014	Malawi	susceptible	LIN-4
ERR181912	Guerra-Assuncao et al., 2014	Malawi	susceptible	LIN-1
ERR181913	Guerra-Assuncao et al., 2014	Malawi	susceptible	LIN-4
ERR181914	Guerra-Assuncao et al., 2014	Malawi	susceptible	LIN-4
ERR181915	Guerra-Assuncao et al., 2014	Malawi	susceptible	LIN-4
ERR181916	Guerra-Assuncao et al., 2014	Malawi	susceptible	LIN-2
ERR181917	Guerra-Assuncao et al., 2014	Malawi	susceptible	LIN-4
ERR181918	Guerra-Assuncao et al., 2014	Malawi	susceptible	LIN-2
ERR181919	Guerra-Assuncao et al., 2014	Malawi	susceptible	LIN-3
ERR181920	Guerra-Assuncao et al., 2014	Malawi	susceptible	LIN-1
ERR181922	Guerra-Assuncao et al., 2014	Malawi	susceptible	LIN-4
ERR181923	Guerra-Assuncao et al., 2014	Malawi	susceptible	LIN-4
ERR181924	Guerra-Assuncao et al., 2014	Malawi	susceptible	LIN-4
ERR181925	Guerra-Assuncao et al., 2014	Malawi	susceptible	LIN-4
ERR181926	Guerra-Assuncao et al., 2014	Malawi	susceptible	LIN-4
ERR181927	Guerra-Assuncao et al., 2014	Malawi	susceptible	LIN-4
ERR181928	Guerra-Assuncao et al., 2014	Malawi	susceptible	LIN-4
ERR181929	Guerra-Assuncao et al., 2014	Malawi	susceptible	LIN-1
ERR181931	Guerra-Assuncao et al., 2014	Malawi	susceptible	LIN-4
ERR181935	Guerra-Assuncao et al., 2014	Malawi	susceptible	LIN-4
ERR181936	Guerra-Assuncao et al., 2014	Malawi	susceptible	LIN-1
ERR181938	Guerra-Assuncao et al., 2014	Malawi	susceptible	LIN-4
ERR181939	Guerra-Assuncao et al., 2014	Malawi	susceptible	LIN-4
ERR181940	Guerra-Assuncao et al., 2014	Malawi	susceptible	LIN-3
ERR181941	Guerra-Assuncao et al., 2014	Malawi	susceptible	LIN-2
ERR181943	Guerra-Assuncao et al., 2014	Malawi	susceptible	LIN-4
ERR181944	Guerra-Assuncao et al., 2014	Malawi	susceptible	LIN-4
ERR181946	Guerra-Assuncao et al., 2014	Malawi	susceptible	LIN-4
ERR181947	Guerra-Assuncao et al., 2014	Malawi	susceptible	LIN-4
ERR181948	Guerra-Assuncao et al., 2014	Malawi	susceptible	LIN-4
ERR181949	Guerra-Assuncao et al., 2014	Malawi	susceptible	LIN-1
ERR181950	Guerra-Assuncao et al., 2014	Malawi	susceptible	LIN-4
ERR181951	Guerra-Assuncao et al., 2014	Malawi	susceptible	LIN-1
ERR181952	Guerra-Assuncao et al., 2014	Malawi	susceptible	LIN-3
ERR181953	Guerra-Assuncao et al., 2014	Malawi	susceptible	LIN-3
ERR181954	Guerra-Assuncao et al., 2014	Malawi	susceptible	LIN-4
ERR181955	Guerra-Assuncao et al., 2014	Malawi	susceptible	LIN-4
ERR181957	Guerra-Assuncao et al., 2014	Malawi	susceptible	LIN-4
ERR181958	Guerra-Assuncao et al., 2014	Malawi	susceptible	LIN-4
ERR181959	Guerra-Assuncao et al., 2014	Malawi	susceptible	LIN-4
ERR181960	Guerra-Assuncao et al., 2014	Malawi	susceptible	LIN-2
ERR181961	Guerra-Assuncao et al., 2014	Malawi	susceptible	LIN-1
ERR181962	Guerra-Assuncao et al., 2014	Malawi	susceptible	LIN-4
ERR181963	Guerra-Assuncao et al., 2014	Malawi	susceptible	LIN-1
ERR181964	Guerra-Assuncao et al., 2014	Malawi	susceptible	LIN-4
ERR181965	Guerra-Assuncao et al., 2014	Malawi	susceptible	LIN-2
ERR181966	Guerra-Assuncao et al., 2014	Malawi	susceptible	LIN-4
ERR181967	Guerra-Assuncao et al., 2014	Malawi	susceptible	LIN-4
ERR181968	Guerra-Assuncao et al., 2014	Malawi	susceptible	LIN-4
ERR181969	Guerra-Assuncao et al., 2014	Malawi	susceptible	LIN-1
ERR181970	Guerra-Assuncao et al., 2014	Malawi	susceptible	LIN-3
ERR181971	Guerra-Assuncao et al., 2014	Malawi	susceptible	LIN-1
ERR181972	Guerra-Assuncao et al., 2014	Malawi	susceptible	LIN-4
ERR181973	Guerra-Assuncao et al., 2014	Malawi	susceptible	LIN-4
ERR181974	Guerra-Assuncao et al., 2014	Malawi	susceptible	LIN-4
ERR181975	Guerra-Assuncao et al., 2014	Malawi	susceptible	LIN-4
ERR181978	Guerra-Assuncao et al., 2014	Malawi	susceptible	LIN-4
ERR181979	Guerra-Assuncao et al., 2014	Malawi	susceptible	LIN-4
ERR181980	Guerra-Assuncao et al., 2014	Malawi	susceptible	LIN-B
ERR181981	Guerra-Assuncao et al., 2014	Malawi	susceptible	LIN-4
ERR181982	Guerra-Assuncao et al., 2014	Malawi	susceptible	LIN-1
ERR181983	Guerra-Assuncao et al., 2014	Malawi	susceptible	LIN-1
ERR181984	Guerra-Assuncao et al., 2014	Malawi	susceptible	LIN-4
ERR181985	Guerra-Assuncao et al., 2014	Malawi	susceptible	LIN-4
ERR181987	Guerra-Assuncao et al., 2014	Malawi	susceptible	LIN-4
ERR181988	Guerra-Assuncao et al., 2014	Malawi	susceptible	LIN-4
ERR181989	Guerra-Assuncao et al., 2014	Malawi	susceptible	LIN-4
ERR181990	Guerra-Assuncao et al., 2014	Malawi	susceptible	LIN-4
ERR181991	Guerra-Assuncao et al., 2014	Malawi	susceptible	LIN-4
ERR181992	Guerra-Assuncao et al., 2014	Malawi	susceptible	LIN-4
ERR181993	Guerra-Assuncao et al., 2014	Malawi	susceptible	LIN-4
ERR181994	Guerra-Assuncao et al., 2014	Malawi	susceptible	LIN-3
ERR181995	Guerra-Assuncao et al., 2014	Malawi	susceptible	LIN-4
ERR181996	Guerra-Assuncao et al., 2014	Malawi	susceptible	LIN-4
ERR181997	Guerra-Assuncao et al., 2014	Malawi	susceptible	LIN-4
ERR181998	Guerra-Assuncao et al., 2014	Malawi	susceptible	LIN-4
ERR181999	Guerra-Assuncao et al., 2014	Malawi	susceptible	LIN-4
ERR182000	Guerra-Assuncao et al., 2014	Malawi	susceptible	LIN-4
ERR182001	Guerra-Assuncao et al., 2014	Malawi	susceptible	LIN-4
ERR182002	Guerra-Assuncao et al., 2014	Malawi	susceptible	LIN-4
ERR182003	Guerra-Assuncao et al., 2014	Malawi	susceptible	LIN-4
ERR182004	Guerra-Assuncao et al., 2014	Malawi	susceptible	LIN-4
ERR182005	Guerra-Assuncao et al., 2014	Malawi	susceptible	LIN-4
ERR182006	Guerra-Assuncao et al., 2014	Malawi	susceptible	LIN-4
ERR182007	Guerra-Assuncao et al., 2014	Malawi	susceptible	LIN-4
ERR182008	Guerra-Assuncao et al., 2014	Malawi	susceptible	LIN-1
ERR182009	Guerra-Assuncao et al., 2014	Malawi	susceptible	LIN-1
ERR182010	Guerra-Assuncao et al., 2014	Malawi	susceptible	LIN-1
ERR182011	Guerra-Assuncao et al., 2014	Malawi	susceptible	LIN-4
ERR182012	Guerra-Assuncao et al., 2014	Malawi	susceptible	LIN-4
ERR182013	Guerra-Assuncao et al., 2014	Malawi	susceptible	LIN-3
ERR182014	Guerra-Assuncao et al., 2014	Malawi	susceptible	LIN-4
ERR182015	Guerra-Assuncao et al., 2014	Malawi	susceptible	LIN-4
ERR182016	Guerra-Assuncao et al., 2014	Malawi	susceptible	LIN-4
ERR182017	Guerra-Assuncao et al., 2014	Malawi	susceptible	LIN-1
ERR182018	Guerra-Assuncao et al., 2014	Malawi	susceptible	LIN-4
ERR182019	Guerra-Assuncao et al., 2014	Malawi	susceptible	LIN-4
ERR182020	Guerra-Assuncao et al., 2014	Malawi	susceptible	LIN-4
ERR182021	Guerra-Assuncao et al., 2014	Malawi	susceptible	LIN-4
ERR182022	Guerra-Assuncao et al., 2014	Malawi	susceptible	LIN-4
ERR182023	Guerra-Assuncao et al., 2014	Malawi	susceptible	LIN-4
ERR182024	Guerra-Assuncao et al., 2014	Malawi	susceptible	LIN-1
ERR182025	Guerra-Assuncao et al., 2014	Malawi	susceptible	LIN-4
ERR182027	Guerra-Assuncao et al., 2014	Malawi	susceptible	LIN-4
ERR182028	Guerra-Assuncao et al., 2014	Malawi	susceptible	LIN-4
ERR182029	Guerra-Assuncao et al., 2014	Malawi	susceptible	LIN-4
ERR182030	Guerra-Assuncao et al., 2014	Malawi	susceptible	LIN-4
ERR182031	Guerra-Assuncao et al., 2014	Malawi	susceptible	LIN-4
ERR182032	Guerra-Assuncao et al., 2014	Malawi	susceptible	LIN-4
ERR182033	Guerra-Assuncao et al., 2014	Malawi	susceptible	LIN-3
ERR182034	Guerra-Assuncao et al., 2014	Malawi	susceptible	LIN-4
ERR182035	Guerra-Assuncao et al., 2014	Malawi	susceptible	LIN-4
ERR182036	Guerra-Assuncao et al., 2014	Malawi	susceptible	LIN-1
ERR182037	Guerra-Assuncao et al., 2014	Malawi	susceptible	LIN-1
ERR182038	Guerra-Assuncao et al., 2014	Malawi	susceptible	LIN-4
ERR182039	Guerra-Assuncao et al., 2014	Malawi	susceptible	LIN-4
ERR182040	Guerra-Assuncao et al., 2014	Malawi	susceptible	LIN-4
ERR182041	Guerra-Assuncao et al., 2014	Malawi	susceptible	LIN-4
ERR182042	Guerra-Assuncao et al., 2014	Malawi	susceptible	LIN-1
ERR182043	Guerra-Assuncao et al., 2014	Malawi	susceptible	LIN-4
ERR182044	Guerra-Assuncao et al., 2014	Malawi	susceptible	LIN-1
ERR182045	Guerra-Assuncao et al., 2014	Malawi	susceptible	LIN-1
ERR182046	Guerra-Assuncao et al., 2014	Malawi	susceptible	LIN-4
ERR182047	Guerra-Assuncao et al., 2014	Malawi	susceptible	LIN-4
ERR182048	Guerra-Assuncao et al., 2014	Malawi	susceptible	LIN-4
ERR182049	Guerra-Assuncao et al., 2014	Malawi	susceptible	LIN-1
ERR182050	Guerra-Assuncao et al., 2014	Malawi	susceptible	LIN-4
ERR182051	Guerra-Assuncao et al., 2014	Malawi	susceptible	LIN-4
ERR182052	Guerra-Assuncao et al., 2014	Malawi	susceptible	LIN-4
ERR182053	Guerra-Assuncao et al., 2014	Malawi	susceptible	LIN-1
ERR182054	Guerra-Assuncao et al., 2014	Malawi	susceptible	LIN-4
ERR182055	Guerra-Assuncao et al., 2014	Malawi	susceptible	LIN-4
ERR182056	Guerra-Assuncao et al., 2014	Malawi	susceptible	LIN-4
ERR182057	Guerra-Assuncao et al., 2014	Malawi	susceptible	LIN-3
ERR190328	Guerra-Assuncao et al., 2014	Malawi	susceptible	LIN-4
ERR190329	Guerra-Assuncao et al., 2014	Malawi	susceptible	LIN-4
ERR190330	Guerra-Assuncao et al., 2014	Malawi	susceptible	LIN-4
ERR190331	Guerra-Assuncao et al., 2014	Malawi	susceptible	LIN-4
ERR190332	Guerra-Assuncao et al., 2014	Malawi	susceptible	LIN-4
ERR190333	Guerra-Assuncao et al., 2014	Malawi	susceptible	LIN-3
ERR190334	Guerra-Assuncao et al., 2014	Malawi	susceptible	LIN-4
ERR190335	Guerra-Assuncao et al., 2014	Malawi	susceptible	LIN-4
ERR190336	Guerra-Assuncao et al., 2014	Malawi	susceptible	LIN-1
ERR190337	Guerra-Assuncao et al., 2014	Malawi	susceptible	LIN-1
ERR190338	Guerra-Assuncao et al., 2014	Malawi	susceptible	LIN-4
ERR190339	Guerra-Assuncao et al., 2014	Malawi	susceptible	LIN-4
ERR190341	Guerra-Assuncao et al., 2014	Malawi	susceptible	LIN-3
ERR190344	Guerra-Assuncao et al., 2014	Malawi	susceptible	LIN-1
ERR190345	Guerra-Assuncao et al., 2014	Malawi	susceptible	LIN-1
ERR190346	Guerra-Assuncao et al., 2014	Malawi	susceptible	LIN-4
ERR190348	Guerra-Assuncao et al., 2014	Malawi	susceptible	LIN-4
ERR190349	Guerra-Assuncao et al., 2014	Malawi	susceptible	LIN-1
ERR190350	Guerra-Assuncao et al., 2014	Malawi	susceptible	LIN-4
ERR190351	Guerra-Assuncao et al., 2014	Malawi	susceptible	LIN-4
ERR190353	Guerra-Assuncao et al., 2014	Malawi	susceptible	LIN-1
ERR190354	Guerra-Assuncao et al., 2014	Malawi	susceptible	LIN-4
ERR190356	Guerra-Assuncao et al., 2014	Malawi	susceptible	LIN-4
ERR190357	Guerra-Assuncao et al., 2014	Malawi	susceptible	LIN-3
ERR190360	Guerra-Assuncao et al., 2014	Malawi	susceptible	LIN-4
ERR190366	Guerra-Assuncao et al., 2014	Malawi	susceptible	LIN-4
ERR190368	Guerra-Assuncao et al., 2014	Malawi	susceptible	LIN-2
ERR190369	Guerra-Assuncao et al., 2014	Malawi	susceptible	LIN-2
ERR190372	Guerra-Assuncao et al., 2014	Malawi	susceptible	LIN-3
ERR190373	Guerra-Assuncao et al., 2014	Malawi	susceptible	LIN-4
ERR190374	Guerra-Assuncao et al., 2014	Malawi	susceptible	LIN-4
ERR190375	Guerra-Assuncao et al., 2014	Malawi	susceptible	LIN-4
ERR190376	Guerra-Assuncao et al., 2014	Malawi	susceptible	LIN-4
ERR190377	Guerra-Assuncao et al., 2014	Malawi	susceptible	LIN-1
ERR190378	Guerra-Assuncao et al., 2014	Malawi	susceptible	LIN-2
ERR190380	Guerra-Assuncao et al., 2014	Malawi	susceptible	LIN-4
ERR190381	Guerra-Assuncao et al., 2014	Malawi	susceptible	LIN-4
ERR190382	Guerra-Assuncao et al., 2014	Malawi	susceptible	LIN-1
ERR190383	Guerra-Assuncao et al., 2014	Malawi	susceptible	LIN-4
ERR190384	Guerra-Assuncao et al., 2014	Malawi	susceptible	LIN-4
ERR190385	Guerra-Assuncao et al., 2014	Malawi	susceptible	LIN-4
ERR190386	Guerra-Assuncao et al., 2014	Malawi	susceptible	LIN-2
ERR190387	Guerra-Assuncao et al., 2014	Malawi	susceptible	LIN-4
ERR190389	Guerra-Assuncao et al., 2014	Malawi	susceptible	LIN-1
ERR190390	Guerra-Assuncao et al., 2014	Malawi	susceptible	LIN-4
ERR190392	Guerra-Assuncao et al., 2014	Malawi	susceptible	LIN-4
ERR190394	Guerra-Assuncao et al., 2014	Malawi	susceptible	LIN-3
ERR190395	Guerra-Assuncao et al., 2014	Malawi	susceptible	LIN-4
ERR190396	Guerra-Assuncao et al., 2014	Malawi	susceptible	LIN-4
ERR190397	Guerra-Assuncao et al., 2014	Malawi	susceptible	LIN-4
ERR190398	Guerra-Assuncao et al., 2014	Malawi	susceptible	LIN-4
ERR190399	Guerra-Assuncao et al., 2014	Malawi	susceptible	LIN-4
ERR190400	Guerra-Assuncao et al., 2014	Malawi	susceptible	LIN-4
ERR190401	Guerra-Assuncao et al., 2014	Malawi	susceptible	LIN-2
ERR190402	Guerra-Assuncao et al., 2014	Malawi	susceptible	LIN-3
ERR190403	Guerra-Assuncao et al., 2014	Malawi	susceptible	LIN-1
ERR190404	Guerra-Assuncao et al., 2014	Malawi	susceptible	LIN-3
ERR190405	Guerra-Assuncao et al., 2014	Malawi	susceptible	LIN-4
ERR190407	Guerra-Assuncao et al., 2014	Malawi	susceptible	LIN-3
ERR190408	Guerra-Assuncao et al., 2014	Malawi	susceptible	LIN-3
ERR190409	Guerra-Assuncao et al., 2014	Malawi	susceptible	LIN-4
ERR190410	Guerra-Assuncao et al., 2014	Malawi	susceptible	LIN-4
ERR211991	Guerra-Assuncao et al., 2014	Malawi	susceptible	LIN-1
ERR211992	Guerra-Assuncao et al., 2014	Malawi	susceptible	LIN-4
ERR211993	Guerra-Assuncao et al., 2014	Malawi	susceptible	LIN-4
ERR211994	Guerra-Assuncao et al., 2014	Malawi	susceptible	LIN-4
ERR211995	Guerra-Assuncao et al., 2014	Malawi	susceptible	LIN-4
ERR211996	Guerra-Assuncao et al., 2014	Malawi	susceptible	LIN-4
ERR211997	Guerra-Assuncao et al., 2014	Malawi	susceptible	LIN-3
ERR211998	Guerra-Assuncao et al., 2014	Malawi	susceptible	LIN-4
ERR211999	Guerra-Assuncao et al., 2014	Malawi	susceptible	LIN-4
ERR212000	Guerra-Assuncao et al., 2014	Malawi	susceptible	LIN-4
ERR212003	Guerra-Assuncao et al., 2014	Malawi	susceptible	LIN-4
ERR212007	Guerra-Assuncao et al., 2014	Malawi	susceptible	LIN-3
ERR212009	Guerra-Assuncao et al., 2014	Malawi	susceptible	LIN-4
ERR212010	Guerra-Assuncao et al., 2014	Malawi	susceptible	LIN-4
ERR212011	Guerra-Assuncao et al., 2014	Malawi	susceptible	LIN-4
ERR212012	Guerra-Assuncao et al., 2014	Malawi	susceptible	LIN-4
ERR212013	Guerra-Assuncao et al., 2014	Malawi	susceptible	LIN-2
ERR212014	Guerra-Assuncao et al., 2014	Malawi	susceptible	LIN-2
ERR212015	Guerra-Assuncao et al., 2014	Malawi	susceptible	LIN-4
ERR212016	Guerra-Assuncao et al., 2014	Malawi	susceptible	LIN-4
ERR212018	Guerra-Assuncao et al., 2014	Malawi	susceptible	LIN-4
ERR212019	Guerra-Assuncao et al., 2014	Malawi	susceptible	LIN-4
ERR212020	Guerra-Assuncao et al., 2014	Malawi	susceptible	LIN-4
ERR212023	Guerra-Assuncao et al., 2014	Malawi	susceptible	LIN-4
ERR212025	Guerra-Assuncao et al., 2014	Malawi	susceptible	LIN-4
ERR212026	Guerra-Assuncao et al., 2014	Malawi	susceptible	LIN-3
ERR212027	Guerra-Assuncao et al., 2014	Malawi	susceptible	LIN-3
ERR212028	Guerra-Assuncao et al., 2014	Malawi	susceptible	LIN-4
ERR212029	Guerra-Assuncao et al., 2014	Malawi	susceptible	LIN-3
ERR212030	Guerra-Assuncao et al., 2014	Malawi	susceptible	LIN-4
ERR212031	Guerra-Assuncao et al., 2014	Malawi	susceptible	LIN-3
ERR212032	Guerra-Assuncao et al., 2014	Malawi	susceptible	LIN-4
ERR212035	Guerra-Assuncao et al., 2014	Malawi	susceptible	LIN-4
ERR212036	Guerra-Assuncao et al., 2014	Malawi	susceptible	LIN-4
ERR212037	Guerra-Assuncao et al., 2014	Malawi	susceptible	LIN-2
ERR212038	Guerra-Assuncao et al., 2014	Malawi	susceptible	LIN-1
ERR212039	Guerra-Assuncao et al., 2014	Malawi	susceptible	LIN-4
ERR212040	Guerra-Assuncao et al., 2014	Malawi	susceptible	LIN-4
ERR212041	Guerra-Assuncao et al., 2014	Malawi	susceptible	LIN-4
ERR212043	Guerra-Assuncao et al., 2014	Malawi	susceptible	LIN-4
ERR212044	Guerra-Assuncao et al., 2014	Malawi	susceptible	LIN-4
ERR212045	Guerra-Assuncao et al., 2014	Malawi	susceptible	LIN-4
ERR212046	Guerra-Assuncao et al., 2014	Malawi	susceptible	LIN-4
ERR212047	Guerra-Assuncao et al., 2014	Malawi	susceptible	LIN-4
ERR212048	Guerra-Assuncao et al., 2014	Malawi	susceptible	LIN-1
ERR212049	Guerra-Assuncao et al., 2014	Malawi	susceptible	LIN-4
ERR212050	Guerra-Assuncao et al., 2014	Malawi	susceptible	LIN-4
ERR212051	Guerra-Assuncao et al., 2014	Malawi	susceptible	LIN-4
ERR212052	Guerra-Assuncao et al., 2014	Malawi	susceptible	LIN-B
ERR212053	Guerra-Assuncao et al., 2014	Malawi	susceptible	LIN-4
ERR212055	Guerra-Assuncao et al., 2014	Malawi	susceptible	LIN-4
ERR212056	Guerra-Assuncao et al., 2014	Malawi	susceptible	LIN-4
ERR212057	Guerra-Assuncao et al., 2014	Malawi	susceptible	LIN-4
ERR212060	Guerra-Assuncao et al., 2014	Malawi	susceptible	LIN-4
ERR212061	Guerra-Assuncao et al., 2014	Malawi	susceptible	LIN-4
ERR212062	Guerra-Assuncao et al., 2014	Malawi	susceptible	LIN-4
ERR212063	Guerra-Assuncao et al., 2014	Malawi	susceptible	LIN-4
ERR212064	Guerra-Assuncao et al., 2014	Malawi	susceptible	LIN-4
ERR212065	Guerra-Assuncao et al., 2014	Malawi	susceptible	LIN-4
ERR212066	Guerra-Assuncao et al., 2014	Malawi	susceptible	LIN-1
ERR212067	Guerra-Assuncao et al., 2014	Malawi	susceptible	LIN-1
ERR212068	Guerra-Assuncao et al., 2014	Malawi	susceptible	LIN-4
ERR212070	Guerra-Assuncao et al., 2014	Malawi	susceptible	LIN-4
ERR212071	Guerra-Assuncao et al., 2014	Malawi	susceptible	LIN-4
ERR212072	Guerra-Assuncao et al., 2014	Malawi	susceptible	LIN-4
ERR212073	Guerra-Assuncao et al., 2014	Malawi	susceptible	LIN-1
ERR212074	Guerra-Assuncao et al., 2014	Malawi	susceptible	LIN-4
ERR212075	Guerra-Assuncao et al., 2014	Malawi	susceptible	LIN-4
ERR212076	Guerra-Assuncao et al., 2014	Malawi	susceptible	LIN-4
ERR212077	Guerra-Assuncao et al., 2014	Malawi	susceptible	LIN-4
ERR212079	Guerra-Assuncao et al., 2014	Malawi	susceptible	LIN-1
ERR212080	Guerra-Assuncao et al., 2014	Malawi	susceptible	LIN-4
ERR212081	Guerra-Assuncao et al., 2014	Malawi	susceptible	LIN-2
ERR212083	Guerra-Assuncao et al., 2014	Malawi	susceptible	LIN-4
ERR212084	Guerra-Assuncao et al., 2014	Malawi	susceptible	LIN-1
ERR212085	Guerra-Assuncao et al., 2014	Malawi	susceptible	LIN-4
ERR212086	Guerra-Assuncao et al., 2014	Malawi	susceptible	LIN-4
ERR212087	Guerra-Assuncao et al., 2014	Malawi	susceptible	LIN-4
ERR212089	Guerra-Assuncao et al., 2014	Malawi	susceptible	LIN-1
ERR212090	Guerra-Assuncao et al., 2014	Malawi	susceptible	LIN-1
ERR212091	Guerra-Assuncao et al., 2014	Malawi	susceptible	LIN-B
ERR212092	Guerra-Assuncao et al., 2014	Malawi	susceptible	LIN-4
ERR212093	Guerra-Assuncao et al., 2014	Malawi	susceptible	LIN-1
ERR212094	Guerra-Assuncao et al., 2014	Malawi	susceptible	LIN-1
ERR212095	Guerra-Assuncao et al., 2014	Malawi	susceptible	LIN-4
[truncated: 773 more rows]
