# Supplementary material for: GWAS and functional studies suggest a role for altered DNA repair in the evolution of drug resistance in Mycobacterium tuberculosis
Source: eLife. 2023 Jan 25;12:e75860. doi: 10.7554/eLife.75860 (PMC9876569; doi:10.7554/eLife.75860)
Supplement: Supplementary file 3. — The table contains synonymous changes identified in the multidrug-resistant/extensively drug-resistant strains. [file elife-75860-supp3.xlsx]

## Sheet: Sheet1
Supplemementary File 3: Synonymous change identified in the association analysis
SNP	Chromosome	Position	P.value	maf	nobs	Rsquare.of.Model.without.SNP	Rsquare.of.Model.with.SNP	FDR_Adjusted_P-values	Gene		Variant	Amino acid change	Wild type	Mutated
S_2032848	1	2032848	4.03e-35	0.0200983	2239	0.592269	0.621145	1.61e-30	Rv1795	ID=gene:Rv1795;Name=eccD5;biotype=protein_coding;description=ESX conserved component EccD5. ESX-5 type VII secretion system protein. Probable membrane protein.;gene_id=Rv1795;logic_name=ena	synonymous_variant	p.Ile203Ile	C	T
S_3186094	1	3186094	2.11e-22	0.00692273	2239	0.592269	0.609939	3.75e-18	Rv2874	ID=gene:Rv2874;Name=dipZ;biotype=protein_coding;description=Possible integral membrane C-type cytochrome biogenesis protein DipZ;gene_id=Rv2874;logic_name=ena	synonymous_variant	p.Lys416Lys	G	A
S_1674048	1	1674048	7.92e-16	0.00558285	2239	0.592269	0.604283	7.45e-12	Rv1483	ID=gene:Rv1483;Name=fabG1;biotype=protein_coding;description=3-oxoacyl-[acyl-carrier protein] reductase FabG1 (3-ketoacyl-acyl carrier protein reductase) (mycolic acid biosynthesis a protein);gene_id=Rv1483;logic_name=ena	synonymous_variant	p.Leu203Leu	G	A
S_4295655	1	4295655	2.77e-13	0.00178651	2239	0.592269	0.602123	2.02e-09	Rv3825c	ID=gene:Rv3825c;Name=pks2;biotype=protein_coding;description=Polyketide synthase Pks2;gene_id=Rv3825c;logic_name=ena	synonymous_variant	p.Glu1317Glu	T	C
S_1684436	1	1684436	6.48e-13	0.00200983	2239	0.592269	0.601812	3.83e-09	Rv1493	ID=gene:Rv1493;Name=mutB;biotype=protein_coding;description=Probable methylmalonyl-CoA mutase large subunit MutB (MCM);gene_id=Rv1493;logic_name=ena	synonymous_variant	p.Asp144Asp	C	T
S_137609	1	137609	1.18e-12	0.00357302	2239	0.592269	0.601594	3.83e-09	Rv0113	ID=gene:Rv0113;Name=gmhA;biotype=protein_coding;description=Probable sedoheptulose-7-phosphate isomerase GmhA (phosphoheptose isomerase);gene_id=Rv0113;logic_name=ena	synonymous_variant	p.Tyr97Tyr	T	C
S_78036	1	78036	1.18e-12	0.00357302	2239	0.592269	0.601594	3.83e-09	Rv0070c	ID=gene:Rv0070c;Name=glyA2;biotype=protein_coding;description=Serine hydroxymethyltransferase GlyA2 (serine methylase 2) (SHMT 2);gene_id=Rv0070c;logic_name=ena	synonymous_variant	p.Gln287Gln	T	C
S_1525317	1	1525317	1.18e-12	0.00357302	2239	0.592269	0.601594	3.83e-09	Rv1357c	ID=gene:Rv1357c;biotype=protein_coding;description=Conserved hypothetical protein;gene_id=Rv1357c;logic_name=ena	synonymous_variant	p.Leu300Leu	C	T
S_2014360	1	2014360	1.18e-12	0.00357302	2239	0.592269	0.601594	3.83e-09	Rv1779c	ID=gene:Rv1779c;biotype=protein_coding;description=Possible integral membrane protein;gene_id=Rv1779c;logic_name=ena	synonymous_variant	p.His40His	G	A
S_3239961	1	3239961	1.18e-12	0.00357302	2239	0.592269	0.601594	3.83e-09	Rv2925c	ID=gene:Rv2925c;Name=rnc;biotype=protein_coding;description=Probable ribonuclease III Rnc (RNase III);gene_id=Rv2925c;logic_name=ena	synonymous_variant	p.Val197Val	A	T
S_875664	1	875664	1.18e-12	0.00357302	2239	0.592269	0.601594	3.83e-09	Rv0782	ID=gene:Rv0782;Name=ptrBb;biotype=protein_coding;description=Probable protease II PtrBb [second part] (oligopeptidase B);gene_id=Rv0782;logic_name=ena	synonymous_variant	p.Tyr311Tyr	C	T
S_909202	1	909202	1.18e-12	0.00357302	2239	0.592269	0.601594	3.83e-09	Rv0815c	ID=gene:Rv0815c;Name=cysA2;biotype=protein_coding;description=Probable thiosulfate sulfurtransferase CysA2 (rhodanese-like protein) (thiosulfate cyanide transsulfurase) (thiosulfate thiotransferase);gene_id=Rv0815c;logic_name=ena	synonymous_variant	p.Ile39Ile	A	G
S_1256260	1	1256260	1.2e-12	0.00602948	2239	0.592269	0.601587	3.83e-09	Rv1131	ID=gene:Rv1131;Name=prpC;biotype=protein_coding;description=Probable methylcitrate synthase PrpC;gene_id=Rv1131;logic_name=ena	synonymous_variant	p.Ser43Ser	C	T
S_1848429	1	1848429	1.2e-12	0.00602948	2239	0.592269	0.601587	3.83e-09	Rv1639c	ID=gene:Rv1639c;biotype=protein_coding;description=Conserved hypothetical membrane protein;gene_id=Rv1639c;logic_name=ena	synonymous_variant	p.Ser10Ser	C	T
S_3673122	1	3673122	1.2e-12	0.00602948	2239	0.592269	0.601587	3.83e-09	Rv3292	ID=gene:Rv3292;biotype=protein_coding;description=Conserved hypothetical protein;gene_id=Rv3292;logic_name=ena	synonymous_variant	p.Arg265Arg	G	A
S_4335707	1	4335707	2.45e-12	0.00334971	2239	0.592269	0.601325	7e-09	Rv3859c	ID=gene:Rv3859c;Name=gltB;biotype=protein_coding;description=Probable ferredoxin-dependent glutamate synthase [NADPH] (large subunit) GltB (L-glutamate synthase) (L-glutamate synthetase) (NADH-glutamate synthase) (glutamate synthase (NADH))(NADPH-GOGAT);gene_id=Rv3859c;logic_name=ena	synonymous_variant	p.Pro125Pro	G	A
S_1671823	1	1671823	3.75e-12	0.00580616	2239	0.592269	0.60117	1.02e-08	Rv1481	ID=gene:Rv1481;biotype=protein_coding;description=Probable membrane protein;gene_id=Rv1481;logic_name=ena	synonymous_variant	p.Thr149Thr	G	A
S_2039305	1	2039305	3.75e-12	0.00580616	2239	0.592269	0.60117	1.02e-08	Rv1799	ID=gene:Rv1799;Name=lppT;biotype=protein_coding;description=Probable lipoprotein LppT;gene_id=Rv1799;logic_name=ena	synonymous_variant	p.Pro49Pro	G	A
S_3271414	1	3271414	7.49e-12	0.00625279	2239	0.592269	0.600916	1.6e-08	Rv2935	ID=gene:Rv2935;Name=ppsE;biotype=protein_coding;description=Phenolpthiocerol synthesis type-I polyketide synthase PpsE;gene_id=Rv2935;logic_name=ena	synonymous_variant	p.Asp1226Asp	T	C
S_273099	1	273099	7.49e-12	0.00625279	2239	0.592269	0.600916	1.6e-08	Rv0228	ID=gene:Rv0228;biotype=protein_coding;description=Probable integral membrane acyltransferase;gene_id=Rv0228;logic_name=ena	synonymous_variant	p.Thr15Thr	A	G
S_437572	1	437572	7.49e-12	0.00625279	2239	0.592269	0.600916	1.6e-08	Rv0359	ID=gene:Rv0359;biotype=protein_coding;description=Probable conserved integral membrane protein;gene_id=Rv0359;logic_name=ena	synonymous_variant	p.Leu19Leu	C	T
S_822235	1	822235	7.49e-12	0.00625279	2239	0.592269	0.600916	1.6e-08	Rv0729	ID=gene:Rv0729;Name=xylB;biotype=protein_coding;description=Possible D-xylulose kinase XylB (xylulokinase) (xylulose kinase);gene_id=Rv0729;logic_name=ena	synonymous_variant	p.Thr243Thr	C	G
S_4180018	1	4180018	1.08e-11	0.00580616	2239	0.592269	0.600783	2.25e-08	Rv3729	ID=gene:Rv3729;biotype=protein_coding;description=Possible transferase;gene_id=Rv3729;logic_name=ena	synonymous_variant	p.Leu578Leu	G	A
S_826756	1	826756	1.11e-10	0.0317106	2239	0.592269	0.599934	2e-07	Rv0734	ID=gene:Rv0734;Name=mapA;biotype=protein_coding;description=Methionine aminopeptidase MapA (map) (peptidase M) (MetAP);gene_id=Rv0734;logic_name=ena	synonymous_variant	p.Ala29Ala	C	T
S_3031193	1	3031193	1.35e-10	0.00602948	2239	0.592269	0.599863	2.15e-07	Rv2719c	ID=gene:Rv2719c;biotype=protein_coding;description=Possible conserved membrane protein;gene_id=Rv2719c;logic_name=ena	synonymous_variant	p.Val115Val	T	C
S_895164	1	895164	1.65e-10	0.0321572	2239	0.592269	0.59979	2.15e-07	Rv0802c	ID=gene:Rv0802c;biotype=protein_coding;description=Possible succinyltransferase in the GCN5-related N-acetyltransferase family;gene_id=Rv0802c;logic_name=ena	synonymous_variant	p.Ile155Ile	G	A
S_1154618	1	1154618	1.78e-10	0.0319339	2239	0.592269	0.599762	2.15e-07	Rv1030	ID=gene:Rv1030;Name=kdpB;biotype=protein_coding;description=Probable potassium-transporting P-type ATPase B chain KdpB (potassium-translocating ATPase B chain) (ATP phosphohydrolase [potassium-transporting] B chain) (potassium binding and translocating subunit B);gene_id=Rv1030;logic_name=ena	synonymous_variant	p.Leu299Leu	C	T
S_1203693	1	1203693	1.78e-10	0.0319339	2239	0.592269	0.599762	2.15e-07	Rv1078	ID=gene:Rv1078;Name=pra;biotype=protein_coding;description=Probable proline-rich antigen homolog Pra;gene_id=Rv1078;logic_name=ena	synonymous_variant	p.Ser127Ser	C	T
S_3086731	1	3086731	1.78e-10	0.0319339	2239	0.592269	0.599762	2.15e-07	Rv2779c	ID=gene:Rv2779c;biotype=protein_coding;description=Possible transcriptional regulatory protein (probably Lrp/AsnC-family);gene_id=Rv2779c;logic_name=ena	synonymous_variant	p.His8His	A	G
S_3203157	1	3203157	1.78e-10	0.0319339	2239	0.592269	0.599762	2.15e-07	Rv2893	ID=gene:Rv2893;biotype=protein_coding;description=Possible oxidoreductase;gene_id=Rv2893;logic_name=ena	synonymous_variant	p.Cys246Cys	C	T
S_4086	1	4086	1.78e-10	0.0319339	2239	0.592269	0.599762	2.15e-07	Rv0003	ID=gene:Rv0003;Name=recF;biotype=protein_coding;description=DNA replication and repair protein RecF (single-strand DNA binding protein);gene_id=Rv0003;logic_name=ena	synonymous_variant	p.Gly269Gly	G	T
S_4399683	1	4399683	1.78e-10	0.0319339	2239	0.592269	0.599762	2.15e-07	Rv3910	ID=gene:Rv3910;biotype=protein_coding;description=Probable conserved transmembrane protein;gene_id=Rv3910;logic_name=ena	synonymous_variant	p.Ala1029Ala	C	G
S_751999	1	751999	1.78e-10	0.0319339	2239	0.592269	0.599762	2.15e-07	Rv0655	ID=gene:Rv0655;Name=mkl;biotype=protein_coding;description=Possible ribonucleotide-transport ATP-binding protein ABC transporter Mkl;gene_id=Rv0655;logic_name=ena	synonymous_variant	p.Pro161Pro	C	T
S_1353462	1	1353462	1.78e-10	0.0319339	2239	0.592269	0.599762	2.15e-07	Rv1209	ID=gene:Rv1209;biotype=protein_coding;description=Conserved protein;gene_id=Rv1209;logic_name=ena	synonymous_variant	p.Glu102Glu	G	A
S_1584762	1	1584762	1.78e-10	0.0319339	2239	0.592269	0.599762	2.15e-07	Rv1408	ID=gene:Rv1408;Name=rpe;biotype=protein_coding;description=Probable ribulose-phosphate 3-epimerase Rpe (PPE) (R5P3E) (pentose-5-phosphate 3-epimerase);gene_id=Rv1408;logic_name=ena	synonymous_variant	p.Ala88Ala	G	A
S_2569288	1	2569288	1.78e-10	0.0319339	2239	0.592269	0.599762	2.15e-07	Rv2298	ID=gene:Rv2298;biotype=protein_coding;description=Conserved protein;gene_id=Rv2298;logic_name=ena	synonymous_variant	p.Gly69Gly	G	C
S_2908357	1	2908357	1.78e-10	0.0319339	2239	0.592269	0.599762	2.15e-07	Rv2583c	ID=gene:Rv2583c;Name=relA;biotype=protein_coding;description=Probable GTP pyrophosphokinase RelA (ATP:GTP 3'-pyrophosphotransferase) (PPGPP synthetase I) ((P)PPGPP synthetase) (GTP diphosphokinase);gene_id=Rv2583c;logic_name=ena	synonymous_variant	p.Gly614Gly	G	A
S_2954197	1	2954197	1.78e-10	0.0319339	2239	0.592269	0.599762	2.15e-07	Rv2627c	ID=gene:Rv2627c;biotype=protein_coding;description=Conserved protein;gene_id=Rv2627c;logic_name=ena	synonymous_variant	p.Thr184Thr	G	A
S_3697016	1	3697016	1.78e-10	0.0319339	2239	0.592269	0.599762	2.15e-07	Rv3309c	ID=gene:Rv3309c;Name=upp;biotype=protein_coding;description=Probable uracil phosphoribosyltransferase Upp (UMP pyrophosphorylase) (uprtase) (UMP diphosphorylase);gene_id=Rv3309c;logic_name=ena	synonymous_variant	p.Ala26Ala	G	C
S_4017448	1	4017448	1.78e-10	0.0319339	2239	0.592269	0.599762	2.15e-07	Rv3575c	ID=gene:Rv3575c;biotype=protein_coding;description=Transcriptional regulatory protein (probably LacI-family);gene_id=Rv3575c;logic_name=ena	synonymous_variant	p.Leu241Leu	G	A
S_527895	1	527895	1.78e-10	0.0319339	2239	0.592269	0.599762	2.15e-07	Rv0439c	ID=gene:Rv0439c;biotype=protein_coding;description=Probable dehydrogenase/reductase;gene_id=Rv0439c;logic_name=ena	synonymous_variant	p.Val140Val	T	C
S_907046	1	907046	1.78e-10	0.0319339	2239	0.592269	0.599762	2.15e-07	Rv0812	ID=gene:Rv0812;biotype=protein_coding;description=Probable amino acid aminotransferase;gene_id=Rv0812;logic_name=ena	synonymous_variant	p.Pro208Pro	G	A
S_459729	1	459729	3.05e-10	0.00602948	2239	0.592269	0.599567	3.44e-07	Rv0384c	ID=gene:Rv0384c;Name=clpB;biotype=protein_coding;description=Probable endopeptidase ATP binding protein (chain B) ClpB (ClpB protein) (heat shock protein F84.1);gene_id=Rv0384c;logic_name=ena	synonymous_variant	p.Pro758Pro	G	T
S_1272899	1	1272899	1.26e-09	0.0317106	2239	0.592269	0.599052	1.25e-06	Rv1145	ID=gene:Rv1145;Name=mmpL13a;biotype=protein_coding;description=Probable conserved transmembrane transport protein MmpL13a;gene_id=Rv1145;logic_name=ena	synonymous_variant	p.Arg159Arg	T	G
S_2132640	1	2132640	1.26e-09	0.0317106	2239	0.592269	0.599052	1.25e-06	Rv1882c	ID=gene:Rv1882c;biotype=protein_coding;description=Probable short-chain type dehydrogenase/reductase;gene_id=Rv1882c;logic_name=ena	synonymous_variant	p.Leu188Leu	G	C
S_2267125	1	2267125	1.26e-09	0.0317106	2239	0.592269	0.599052	1.25e-06	Rv2022c	ID=gene:Rv2022c;biotype=protein_coding;description=Conserved protein;gene_id=Rv2022c;logic_name=ena	synonymous_variant	p.Lys200Lys	T	C
S_3161858	1	3161858	1.26e-09	0.0317106	2239	0.592269	0.599052	1.25e-06	Rv2852c	ID=gene:Rv2852c;Name=mqo;biotype=protein_coding;description=Probable malate:quinone oxidoreductase Mqo (malate dehydrogenase [acceptor]);gene_id=Rv2852c;logic_name=ena	synonymous_variant	p.Pro68Pro	T	G
S_3014343	1	3014343	1.26e-09	0.0317106	2239	0.592269	0.599052	1.25e-06	Rv2698	ID=gene:Rv2698;biotype=protein_coding;description=Probable conserved alanine rich transmembrane protein;gene_id=Rv2698;logic_name=ena	synonymous_variant	p.Val57Val	C	T
S_787689	1	787689	3.5e-09	0.00446628	2239	0.592269	0.598684	3.36e-06	Rv0687	ID=gene:Rv0687;biotype=protein_coding;description=Probable short-chain type dehydrogenase/reductase;gene_id=Rv0687;logic_name=ena	synonymous_variant	p.Arg197Arg	G	A
S_3311580	1	3311580	2.32e-08	0.00513622	2239	0.592269	0.598003	2.05e-05	Rv2958c	ID=gene:Rv2958c;biotype=protein_coding;description=Possible glycosyl transferase;gene_id=Rv2958c;logic_name=ena	synonymous_variant	p.Leu141Leu	G	A
S_1540352	1	1540352	3.14e-08	0.0185351	2239	0.592269	0.597894	2.75e-05	Rv1367c	ID=gene:Rv1367c;biotype=protein_coding;description=Conserved protein;gene_id=Rv1367c;logic_name=ena	synonymous_variant	p.His98His	G	A
S_2067227	1	2067227	5.45e-08	0.00178651	2239	0.592269	0.597697	4.27e-05	Rv1821	ID=gene:Rv1821;Name=secA2;biotype=protein_coding;description=Possible preprotein translocase ATPase SecA2;gene_id=Rv1821;logic_name=ena	synonymous_variant	p.Leu257Leu	G	A
S_265854	1	265854	5.45e-08	0.00178651	2239	0.592269	0.597697	4.27e-05	Rv0222	ID=gene:Rv0222;Name=echA1;biotype=protein_coding;description=Probable enoyl-CoA hydratase EchA1 (enoyl hydrase) (unsaturated acyl-CoA hydratase) (crotonase);gene_id=Rv0222;logic_name=ena	synonymous_variant	p.Glu116Glu	G	A
S_416396	1	416396	5.45e-08	0.00178651	2239	0.592269	0.597697	4.27e-05	Rv0346c	ID=gene:Rv0346c;Name=ansP2;biotype=protein_coding;description=Possible L-asparagine permease AnsP2 (L-asparagine transport protein);gene_id=Rv0346c;logic_name=ena	synonymous_variant	p.Ile190Ile	G	A
S_1931226	1	1931226	5.45e-08	0.00178651	2239	0.592269	0.597697	4.27e-05	Rv1704c	ID=gene:Rv1704c;Name=cycA;biotype=protein_coding;description=Probable D-serine/alanine/glycine transporter protein CycA;gene_id=Rv1704c;logic_name=ena	synonymous_variant	p.Leu77Leu	C	T
S_1951260	1	1951260	5.45e-08	0.00178651	2239	0.592269	0.597697	4.27e-05	Rv1725c	ID=gene:Rv1725c;biotype=protein_coding;description=Conserved hypothetical protein;gene_id=Rv1725c;logic_name=ena	synonymous_variant	p.Pro164Pro	A	T
S_2111984	1	2111984	5.45e-08	0.00178651	2239	0.592269	0.597697	4.27e-05	Rv1864c	ID=gene:Rv1864c;biotype=protein_coding;description=Conserved protein;gene_id=Rv1864c;logic_name=ena	synonymous_variant	p.Ser42Ser	C	T
S_3614347	1	3614347	9.64e-08	0.000669942	2239	0.592269	0.597492	7.38e-05	Rv3238c	ID=gene:Rv3238c;biotype=protein_coding;description=Probable conserved integral membrane protein;gene_id=Rv3238c;logic_name=ena	synonymous_variant	p.Leu18Leu	G	A
S_1545349	1	1545349	9.68e-08	0.00357302	2239	0.592269	0.597491	7.38e-05	Rv1372	ID=gene:Rv1372;biotype=protein_coding;description=Conserved hypothetical protein;gene_id=Rv1372;logic_name=ena	synonymous_variant	p.Cys175Cys	T	C
S_1662748	1	1662748	1.27e-07	0.000893256	2239	0.592269	0.597394	9.51e-05	Rv1474c	ID=gene:Rv1474c;biotype=protein_coding;description=Probable transcriptional regulatory protein;gene_id=Rv1474c;logic_name=ena	synonymous_variant	p.Leu153Leu	G	A
S_3311332	1	3311332	1.27e-07	0.000893256	2239	0.592269	0.597394	9.51e-05	Rv2958c	ID=gene:Rv2958c;biotype=protein_coding;description=Possible glycosyl transferase;gene_id=Rv2958c;logic_name=ena	synonymous_variant	p.Thr223Thr	G	A
S_4096499	1	4096499	1.27e-07	0.000893256	2239	0.592269	0.597394	9.51e-05	Rv3658c	ID=gene:Rv3658c;biotype=protein_coding;description=Probable conserved transmembrane protein;gene_id=Rv3658c;logic_name=ena	synonymous_variant	p.Leu147Leu	G	A
