# Supplementary material for: GWAS and functional studies suggest a role for altered DNA repair in the evolution of drug resistance in Mycobacterium tuberculosis
Source: eLife. 2023 Jan 25;12:e75860. doi: 10.7554/eLife.75860 (PMC9876569; doi:10.7554/eLife.75860)
Supplement: Supplementary file 4. — The table contains non-synonymous changes identified in the multidrug-resistant/extensively drug-resistant strains. [file elife-75860-supp4.xlsx]

## Sheet: Sheet1
Supplementary File 4:Non-synonymous change identified in the association analysis
SNP	Chromosome	Position	P.value	maf	nobs	Rsquare.of.Model.without.SNP	Rsquare.of.Model.with.SNP	FDR_Adjusted_P-values	effect	Gene		Variant	Amino acid change	Wild type	Mutated
S_3820364	1	3820364	4.98e-36	0.0196516	2239	0.592269	0.621958	2.66e-31	-2.09254	Rv3401	ID=gene:Rv3401;biotype=protein_coding;description=Conserved protein;gene_id=Rv3401;logic_name=ena	missense_variant	p.Gly775Ser	G	A
S_4173504	1	4173504	4.07e-22	0.00669942	2239	0.592269	0.609692	5.92e-18	1.71662	Rv3727	ID=gene:Rv3727;biotype=protein_coding;description=Possible oxidoreductase;gene_id=Rv3727;logic_name=ena	missense_variant	p.Ser184Ala	T	G
S_3785206	1	3785206	4.07e-22	0.00669942	2239	0.592269	0.609692	5.92e-18	-1.71662	Rv3371	ID=gene:Rv3371;biotype=protein_coding;description=Possible triacylglycerol synthase (diacylglycerol acyltransferase);gene_id=Rv3371;logic_name=ena	missense_variant	p.Ala92Val	C	T
S_698	1	698	4.13e-18	0.00669942	2239	0.592269	0.606235	4.72e-14	-1.97343	Rv0001	ID=gene:Rv0001;Name=dnaA;biotype=protein_coding;description=Chromosomal replication initiator protein DnaA;gene_id=Rv0001;logic_name=ena	missense_variant	p.Arg233Gln	G	A
S_7570	1	7570	5.16e-16	0.0125056	2239	0.592269	0.604442	5.16e-12	0.931721	Rv0006	ID=gene:Rv0006;Name=gyrA;biotype=protein_coding;description=DNA gyrase (subunit A) GyrA (DNA topoisomerase (ATP-hydrolysing)) (DNA topoisomerase II) (type II DNA topoisomerase);gene_id=Rv0006;logic_name=ena	missense_variant	p.Ala90Val	C	T
S_2986827	1	2986827	4.44e-15	0.0127289	2239	0.592269	0.603646	3.95e-11	-0.928387	Rv2670c	ID=gene:Rv2670c;biotype=protein_coding;description=Conserved hypothetical protein;gene_id=Rv2670c;logic_name=ena	missense_variant	p.Ala5Val	G	A
S_2747151	1	2747151	2.96e-14	0.00245645	2239	0.592269	0.602947	2.49e-10	-1.79861	Rv2447c	ID=gene:Rv2447c;Name=folC;biotype=protein_coding;description=Probable folylpolyglutamate synthase protein FolC (folylpoly-gamma-glutamate synthetase) (FPGS);gene_id=Rv2447c;logic_name=ena	missense_variant	p.Ser150Gly	T	C
S_3471079	1	3471079	3.39e-14	0.011389	2239	0.592269	0.602896	2.72e-10	-1.19742	Rv3102c	ID=gene:Rv3102c;Name=ftsE;biotype=protein_coding;description=Putative cell division ATP-binding protein FtsE (septation component-transport ATP-binding protein ABC transporter);gene_id=Rv3102c;logic_name=ena	missense_variant	p.Val97Ala	CA	TG
S_2127102	1	2127102	2.77e-13	0.00178651	2239	0.592269	0.602123	2.02e-09	2.00552	Rv1877	ID=gene:Rv1877;biotype=protein_coding;description=Probable conserved integral membrane protein;gene_id=Rv1877;logic_name=ena	missense_variant	p.Asn400Ser	A	G
S_1304962	1	1304962	1.18e-12	0.00357302	2239	0.592269	0.601594	3.83e-09	-1.97595	Rv1173	ID=gene:Rv1173;Name=fbiC;biotype=protein_coding;description=Probable F420 biosynthesis protein FbiC;gene_id=Rv1173;logic_name=ena	missense_variant	p.Trp678Gly	T	G
S_1844143	1	1844143	1.18e-12	0.00357302	2239	0.592269	0.601594	3.83e-09	-1.97595	Rv1638	ID=gene:Rv1638;Name=uvrA;biotype=protein_coding;description=Probable excinuclease ABC (subunit A-DNA-binding ATPase) UvrA;gene_id=Rv1638;logic_name=ena	missense_variant	p.Gln135Lys	C	A
S_2294568	1	2294568	1.18e-12	0.00357302	2239	0.592269	0.601594	3.83e-09	-1.97595	Rv2048c	ID=gene:Rv2048c;Name=pks12;biotype=protein_coding;description=Polyketide synthase Pks12;gene_id=Rv2048c;logic_name=ena	missense_variant	p.Asp4140Ala	T	G
S_4031277	1	4031277	1.18e-12	0.00357302	2239	0.592269	0.601594	3.83e-09	-1.97595	Rv3589	ID=gene:Rv3589;Name=mutY;biotype=protein_coding;description=Probable adenine glycosylase MutY;gene_id=Rv3589;logic_name=ena	missense_variant	p.Arg262Gln	G	A
S_4383789	1	4383789	1.18e-12	0.00357302	2239	0.592269	0.601594	3.83e-09	-1.97595	Rv3898c	ID=gene:Rv3898c;biotype=protein_coding;description=Conserved hypothetical protein;gene_id=Rv3898c;logic_name=ena	missense_variant	p.Pro66Leu	G	A
S_187383	1	187383	1.18e-12	0.00357302	2239	0.592269	0.601594	3.83e-09	1.97595	Rv0158	ID=gene:Rv0158;biotype=protein_coding;description=Probable transcriptional regulatory protein (possibly TetR-family);gene_id=Rv0158;logic_name=ena	missense_variant	p.Glu200Gly	A	G
S_3198076	1	3198076	1.18e-12	0.00357302	2239	0.592269	0.601594	3.83e-09	1.97595	Rv2888c	ID=gene:Rv2888c;Name=amiC;biotype=protein_coding;description=Probable amidase AmiC (aminohydrolase);gene_id=Rv2888c;logic_name=ena	missense_variant	p.Gln70His	C	G
S_4164553	1	4164553	1.18e-12	0.00357302	2239	0.592269	0.601594	3.83e-09	1.97595	Rv3720	ID=gene:Rv3720;biotype=protein_coding;description=Possible fatty acid synthase;gene_id=Rv3720;logic_name=ena	missense_variant	p.Asn273Ser	A	G
S_60185	1	60185	1.18e-12	0.00357302	2239	0.592269	0.601594	3.83e-09	1.97595	Rv0057	ID=gene:Rv0057;biotype=protein_coding;description=Hypothetical protein;gene_id=Rv0057;logic_name=ena	missense_variant	p.Thr97Ile	C	T
S_3088648	1	3088648	1.2e-12	0.00602948	2239	0.592269	0.601587	3.83e-09	-2.00903	Rv2781c	ID=gene:Rv2781c;biotype=protein_coding;description=Possible alanine rich oxidoreductase;gene_id=Rv2781c;logic_name=ena	missense_variant	p.Lys113Glu	T	C
S_2157767	1	2157767	2.45e-12	0.00334971	2239	0.592269	0.601325	7e-09	-2.00173	Rv1911c	ID=gene:Rv1911c;Name=lppC;biotype=protein_coding;description=Probable lipoprotein LppC;gene_id=Rv1911c;logic_name=ena	missense_variant	p.Ser74Ile	C	A
S_3592147	1	3592147	2.45e-12	0.00334971	2239	0.592269	0.601325	7e-09	-2.00173	Rv3214	ID=gene:Rv3214;Name=gpm2;biotype=protein_coding;description=Possible phosphoglycerate mutase Gpm2 (phosphoglyceromutase) (PGAM) (BPG-dependent PGAM);gene_id=Rv3214;logic_name=ena	missense_variant	p.Arg168Tyr	CG	TA
S_70129	1	70129	2.45e-12	0.00334971	2239	0.592269	0.601325	7e-09	-2.00173	Rv0064	ID=gene:Rv0064;biotype=protein_coding;description=Probable conserved transmembrane protein;gene_id=Rv0064;logic_name=ena	missense_variant	p.Pro504Thr	C	A
S_1103335	1	1103335	7.49e-12	0.00625279	2239	0.592269	0.600916	1.6e-08	-1.89198	Rv0987	ID=gene:Rv0987;biotype=protein_coding;description=Probable adhesion component transport transmembrane protein ABC transporter;gene_id=Rv0987;logic_name=ena	missense_variant	p.Ser265Asn	G	A
S_2422101	1	2422101	7.49e-12	0.00625279	2239	0.592269	0.600916	1.6e-08	-1.89198	Rv2160A	ID=gene:Rv2160A;biotype=protein_coding;description=Conserved hypothetical protein;gene_id=Rv2160A;logic_name=ena	missense_variant	p.Thr60Ala	T	C
S_1406608	1	1406608	7.49e-12	0.00625279	2239	0.592269	0.600916	1.6e-08	1.89198	Rv1258c	ID=gene:Rv1258c;biotype=protein_coding;description=Probable conserved integral membrane transport protein;gene_id=Rv1258c;logic_name=ena	missense_variant	p.Val245Met	C	T
S_170080	1	170080	7.49e-12	0.00625279	2239	0.592269	0.600916	1.6e-08	1.89198	Rv0143c	ID=gene:Rv0143c;biotype=protein_coding;description=Probable conserved transmembrane protein;gene_id=Rv0143c;logic_name=ena	missense_variant	p.Gly35Ser	C	T
S_603561	1	603561	7.49e-12	0.00625279	2239	0.592269	0.600916	1.6e-08	1.89198	Rv0511	ID=gene:Rv0511;Name=hemD;biotype=protein_coding;description=Probable uroporphyrin-III C-methyltransferase HemD (uroporphyrinogen III methylase) (urogen III methylase) (SUMT) (urogen III methylase) (UROM);gene_id=Rv0511;logic_name=ena	missense_variant	p.Asp248Gly	A	G
S_758548	1	758548	7.49e-12	0.00625279	2239	0.592269	0.600916	1.6e-08	1.89198	Rv0664	ID=gene:Rv0664;Name=vapB8;biotype=protein_coding;description=Possible antitoxin VapB8;gene_id=Rv0664;logic_name=ena	missense_variant	p.Cys6Phe	G	T
S_4353655	1	4353655	2.11e-11	0.00647611	2239	0.592269	0.600539	4.26e-08	1.81219	Rv3876	ID=gene:Rv3876;Name=espI;biotype=protein_coding;description=ESX-1 secretion-associated protein EspI. Conserved proline and alanine rich protein.;gene_id=Rv3876;logic_name=ena	missense_variant	p.Thr216Pro	A	C,G
S_2065936	1	2065936	5.24e-11	0.00580616	2239	0.592269	0.600207	1.04e-07	-1.86921	Rv1820	ID=gene:Rv1820;Name=ilvG;biotype=protein_coding;description=Probable acetolactate synthase IlvG (acetohydroxy-acid synthase)(ALS);gene_id=Rv1820;logic_name=ena	missense_variant	p.Ala380Thr	G	A
S_4329228	1	4329228	5.24e-11	0.00580616	2239	0.592269	0.600207	1.04e-07	-1.86921	Rv3856c	ID=gene:Rv3856c;biotype=protein_coding;description=Conserved hypothetical protein;gene_id=Rv3856c;logic_name=ena	missense_variant	p.Thr61Ala	T	C
S_3327360	1	3327360	7.1e-11	0.00602948	2239	0.592269	0.600097	1.37e-07	-1.7932	Rv2972c	ID=gene:Rv2972c;biotype=protein_coding;description=Possible conserved membrane or exported protein;gene_id=Rv2972c;logic_name=ena	missense_variant	p.Thr126Ser	G	C
S_7572	1	7572	9.55e-11	0.00424297	2239	0.592269	0.599989	1.77e-07	-1.2325	Rv0006	ID=gene:Rv0006;Name=gyrA;biotype=protein_coding;description=DNA gyrase (subunit A) GyrA (DNA topoisomerase (ATP-hydrolysing)) (DNA topoisomerase II) (type II DNA topoisomerase);gene_id=Rv0006;logic_name=ena	missense_variant	p.Ser91Pro	T	C
S_550953	1	550953	9.62e-11	0.00133988	2239	0.592269	0.599986	1.77e-07	2.03999	Rv0458	ID=gene:Rv0458;biotype=protein_coding;description=Probable aldehyde dehydrogenase;gene_id=Rv0458;logic_name=ena	missense_variant	p.Thr427Pro	A	C
S_4367633	1	4367633	1.11e-10	0.0317106	2239	0.592269	0.599934	2e-07	-1.89821	Rv3885c	ID=gene:Rv3885c;Name=eccE2;biotype=protein_coding;description=ESX conserved component EccE2. ESX-2 type VII secretion system protein. Possible membrane protein.;gene_id=Rv3885c;logic_name=ena	missense_variant	p.Thr297Ala	T	C
S_4372052	1	4372052	1.28e-10	0.00558285	2239	0.592269	0.599881	2.15e-07	-1.84862	Rv3888c	ID=gene:Rv3888c;biotype=protein_coding;description=Probable conserved membrane protein;gene_id=Rv3888c;logic_name=ena	missense_variant	p.Met219Val	T	C
S_1258169	1	1258169	1.35e-10	0.00602948	2239	0.592269	0.599863	2.15e-07	1.76672	Rv1132	ID=gene:Rv1132;biotype=protein_coding;description=Conserved membrane protein;gene_id=Rv1132;logic_name=ena	missense_variant	p.Asp282Ala	A	C
S_3437767	1	3437767	1.35e-10	0.00602948	2239	0.592269	0.599863	2.15e-07	1.76672	Rv3074	ID=gene:Rv3074;biotype=protein_coding;description=Conserved hypothetical protein;gene_id=Rv3074;logic_name=ena	missense_variant	p.Tyr330Cys	A	G
S_488153	1	488153	1.35e-10	0.00602948	2239	0.592269	0.599863	2.15e-07	1.76672	Rv0405	ID=gene:Rv0405;Name=pks6;biotype=protein_coding;description=Probable membrane bound polyketide synthase Pks6;gene_id=Rv0405;logic_name=ena	missense_variant	p.Gln808Arg	A	G
S_2964454	1	2964454	1.78e-10	0.0319339	2239	0.592269	0.599762	2.15e-07	1.93856	Rv2638	ID=gene:Rv2638;biotype=protein_coding;description=Conserved hypothetical protein;gene_id=Rv2638;logic_name=ena	missense_variant	p.Pro17Leu	C	T
S_3610335	1	3610335	1.78e-10	0.0319339	2239	0.592269	0.599762	2.15e-07	1.93856	Rv3233c	ID=gene:Rv3233c;biotype=protein_coding;description=Possible triacylglycerol synthase (diacylglycerol acyltransferase);gene_id=Rv3233c;logic_name=ena	missense_variant	p.Arg13Ser	G	T
S_4349982	1	4349982	1.78e-10	0.0319339	2239	0.592269	0.599762	2.15e-07	1.93856	Rv3871	ID=gene:Rv3871;Name=eccCb1;biotype=protein_coding;description=ESX conserved component EccCb1. ESX-1 type VII secretion system protein.;gene_id=Rv3871;logic_name=ena	missense_variant	p.Ala386Ser	G	T
S_4358998	1	4358998	1.78e-10	0.0319339	2239	0.592269	0.599762	2.15e-07	1.93856	Rv3879c	ID=gene:Rv3879c;Name=espK;biotype=protein_coding;description=ESX-1 secretion-associated protein EspK. Alanine and proline rich protein.;gene_id=Rv3879c;logic_name=ena	missense_variant	p.Ile262Thr	A	G
S_1035426	1	1035426	1.78e-10	0.0319339	2239	0.592269	0.599762	2.15e-07	-1.93856	Rv0928	ID=gene:Rv0928;Name=pstS3;biotype=protein_coding;description=Periplasmic phosphate-binding lipoprotein PstS3 (PBP-3) (PstS3) (PHOS1);gene_id=Rv0928;logic_name=ena	missense_variant	p.Phe175Cys	T	G
S_1155884	1	1155884	1.78e-10	0.0319339	2239	0.592269	0.599762	2.15e-07	-1.93856	Rv1031	ID=gene:Rv1031;Name=kdpC;biotype=protein_coding;description=Probable potassium-transporting ATPase C chain KdpC (potassium-translocating ATPase C chain) (ATP phosphohydrolase [potassium-transporting] C chain) (potassium binding and translocating subunit C);gene_id=Rv1031;logic_name=ena	missense_variant	p.Met11Thr	T	C
S_143120	1	143120	1.78e-10	0.0319339	2239	0.592269	0.599762	2.15e-07	-1.93856	Rv0118c	ID=gene:Rv0118c;Name=oxcA;biotype=protein_coding;description=Probable oxalyl-CoA decarboxylase OxcA;gene_id=Rv0118c;logic_name=ena	missense_variant	p.Ala253Ser	C	A
S_1668082	1	1668082	1.78e-10	0.0319339	2239	0.592269	0.599762	2.15e-07	-1.93856	Rv1477	ID=gene:Rv1477;Name=ripA;biotype=protein_coding;description=Peptidoglycan hydrolase;gene_id=Rv1477;logic_name=ena	missense_variant	p.Ala365Pro	G	C
S_2127011	1	2127011	1.78e-10	0.0319339	2239	0.592269	0.599762	2.15e-07	-1.93856	Rv1877	ID=gene:Rv1877;biotype=protein_coding;description=Probable conserved integral membrane protein;gene_id=Rv1877;logic_name=ena	missense_variant	p.Trp370Gly	T	G
S_2335638	1	2335638	1.78e-10	0.0319339	2239	0.592269	0.599762	2.15e-07	-1.93856	Rv2079	ID=gene:Rv2079;biotype=protein_coding;description=Conserved hypothetical protein;gene_id=Rv2079;logic_name=ena	missense_variant	p.Leu95Ser	T	C
S_3566107	1	3566107	1.78e-10	0.0319339	2239	0.592269	0.599762	2.15e-07	-1.93856	Rv3196	ID=gene:Rv3196;biotype=protein_coding;description=Conserved hypothetical protein;gene_id=Rv3196;logic_name=ena	missense_variant	p.Ala107Asp	C	A
S_404130	1	404130	1.78e-10	0.0319339	2239	0.592269	0.599762	2.15e-07	-1.93856	Rv0338c	ID=gene:Rv0338c;biotype=protein_coding;description=Probable iron-sulfur-binding reductase;gene_id=Rv0338c;logic_name=ena	missense_variant	p.Glu571Gly	T	C
S_262570	1	262570	3.05e-10	0.00602948	2239	0.592269	0.599567	3.44e-07	-1.74628	Rv0219	ID=gene:Rv0219;biotype=protein_coding;description=Probable conserved transmembrane protein;gene_id=Rv0219;logic_name=ena	missense_variant	p.Leu106Arg	T	G
S_3452792	1	3452792	3.05e-10	0.00602948	2239	0.592269	0.599567	3.44e-07	-1.74628	Rv3086	ID=gene:Rv3086;Name=adhD;biotype=protein_coding;description=Probable zinc-type alcohol dehydrogenase AdhD (aldehyde reductase);gene_id=Rv3086;logic_name=ena	missense_variant	p.Glu338Lys	G	A
S_415155	1	415155	3.05e-10	0.00602948	2239	0.592269	0.599567	3.44e-07	-1.74628	Rv0345	ID=gene:Rv0345;biotype=protein_coding;description=Conserved hypothetical protein;gene_id=Rv0345;logic_name=ena	missense_variant	p.Ala36Thr	G	A
S_901110	1	901110	3.05e-10	0.00602948	2239	0.592269	0.599567	3.44e-07	-1.74628	Rv0806c	ID=gene:Rv0806c;Name=cpsY;biotype=protein_coding;description=Possible UDP-glucose-4-epimerase CpsY (galactowaldenase) (UDP-galactose-4-epimerase) (uridine diphosphate galactose-4-epimerase) (uridine diphospho-galactose-4-epimerase);gene_id=Rv0806c;logic_name=ena	missense_variant	p.Asn74Ser	T	C
S_1395859	1	1395859	3.05e-10	0.00602948	2239	0.592269	0.599567	3.44e-07	1.74628	Rv1250	ID=gene:Rv1250;biotype=protein_coding;description=Probable drug-transport integral membrane protein;gene_id=Rv1250;logic_name=ena	missense_variant	p.Pro561Ser	C	T
S_1960409	1	1960409	3.8e-10	0.00401965	2239	0.592269	0.599487	4.25e-07	-1.60325	Rv1733c	ID=gene:Rv1733c;biotype=protein_coding;description=Probable conserved transmembrane protein;gene_id=Rv1733c;logic_name=ena	missense_variant	p.Arg27Trp	G	A
S_761161	1	761161	4.87e-10	0.00714605	2239	0.592269	0.599398	5.37e-07	-0.851207	Rv0667	ID=gene:Rv0667;Name=rpoB;biotype=protein_coding;description=DNA-directed RNA polymerase (beta chain) RpoB (transcriptase beta chain) (RNA polymerase beta subunit);gene_id=Rv0667;logic_name=ena	missense_variant	p.Leu452Pro	T	C
S_3818808	1	3818808	6.26e-10	0.00558285	2239	0.592269	0.599306	6.82e-07	-1.77058	Rv3401	ID=gene:Rv3401;biotype=protein_coding;description=Conserved protein;gene_id=Rv3401;logic_name=ena	missense_variant	p.Gly256Glu	G	A
S_1276392	1	1276392	1.26e-09	0.0317106	2239	0.592269	0.599052	1.25e-06	-1.82638	Rv1148c	ID=gene:Rv1148c;biotype=protein_coding;description=Conserved hypothetical protein;gene_id=Rv1148c;logic_name=ena	missense_variant	p.Pro453Ser	G	A
S_2078967	1	2078967	1.26e-09	0.0317106	2239	0.592269	0.599052	1.25e-06	-1.82638	Rv1833c	ID=gene:Rv1833c;biotype=protein_coding;description=Possible haloalkane dehalogenase;gene_id=Rv1833c;logic_name=ena	missense_variant	p.Asp275Tyr	C	A
S_2210745	1	2210745	1.26e-09	0.0317106	2239	0.592269	0.599052	1.25e-06	-1.82638	Rv1967	ID=gene:Rv1967;Name=mce3B;biotype=protein_coding;description=Mce-family protein Mce3B;gene_id=Rv1967;logic_name=ena	missense_variant	p.Ser49Ala	T	G
S_1482185	1	1482185	1.26e-09	0.0317106	2239	0.592269	0.599052	1.25e-06	1.82638	Rv1319c	ID=gene:Rv1319c;biotype=protein_coding;description=Possible adenylate cyclase (ATP pyrophosphate-lyase) (adenylyl cyclase);gene_id=Rv1319c;logic_name=ena	missense_variant	p.Gly106Asp	C	T
S_2099129	1	2099129	1.26e-09	0.0317106	2239	0.592269	0.599052	1.25e-06	1.82638	Rv1850	ID=gene:Rv1850;Name=ureC;biotype=protein_coding;description=Urease alpha subunit UreC (urea amidohydrolase);gene_id=Rv1850;logic_name=ena	missense_variant	p.Ala390Val	C	T
S_2517129	1	2517129	1.26e-09	0.0317106	2239	0.592269	0.599052	1.25e-06	1.82638	Rv2243	ID=gene:Rv2243;Name=fabD;biotype=protein_coding;description=Malonyl CoA-acyl carrier protein transacylase FabD (malonyl CoA:ACPM acyltransferase) (MCT);gene_id=Rv2243;logic_name=ena	missense_variant	p.Thr115Ala	A	G
S_2544135	1	2544135	1.26e-09	0.0317106	2239	0.592269	0.599052	1.25e-06	1.82638	Rv2268c	ID=gene:Rv2268c;Name=cyp128;biotype=protein_coding;description=Probable cytochrome P450 128 Cyp128;gene_id=Rv2268c;logic_name=ena	missense_variant	p.Ser48Ala	A	C
S_4322600	1	4322600	3.78e-09	0.498883	2239	0.592269	0.598657	3.6e-06	2.67706	Rv3848	ID=gene:Rv3848;biotype=protein_coding;description=Probable conserved transmembrane protein;gene_id=Rv3848;logic_name=ena	missense_variant	p.Ser92Asn	G	A,C
S_2372517	1	2372517	8.62e-09	0.0165252	2239	0.592269	0.598359	8.07e-06	2.43646	Rv2112c	ID=gene:Rv2112c;Name=dop;biotype=protein_coding;description=Deamidase of pup Dop;gene_id=Rv2112c;logic_name=ena	missense_variant	p.Cys18Tyr	C	T
S_4247729	1	4247729	9.06e-09	0.0031264	2239	0.592269	0.598341	8.43e-06	-1.20929	Rv3795	ID=gene:Rv3795;Name=embB;biotype=protein_coding;description=Integral membrane indolylacetylinositol arabinosyltransferase EmbB (arabinosylindolylacetylinositol synthase);gene_id=Rv3795;logic_name=ena	missense_variant	p.Gly406Ser	G	A
S_496334	1	496334	1.08e-08	0.0015632	2239	0.592269	0.598278	9.93e-06	3.20202	Rv0410c	ID=gene:Rv0410c;Name=pknG;biotype=protein_coding;description=Serine/threonine-protein kinase PknG (protein kinase G) (STPK G);gene_id=Rv0410c;logic_name=ena	missense_variant	p.Asp327Glu	G	C
S_2155167	1	2155167	1.1e-08	0.00357302	2239	0.592269	0.598271	1.01e-05	1.84555	Rv1908c	ID=gene:Rv1908c;Name=katG;biotype=protein_coding;description=Catalase-peroxidase-peroxynitritase T KatG;gene_id=Rv1908c;logic_name=ena	missense_variant	p.Ser315Thr	GC	TG
S_1032219	1	1032219	1.48e-08	0.0100491	2239	0.592269	0.598166	1.34e-05	-0.962582	Rv0925c	ID=gene:Rv0925c;biotype=protein_coding;description=Conserved protein;gene_id=Rv0925c;logic_name=ena	missense_variant	p.Cys139Arg	A	G
S_761292	1	761292	2.29e-08	0.00200983	2239	0.592269	0.598008	2.03e-05	-2.66249	Rv0667	ID=gene:Rv0667;Name=rpoB;biotype=protein_coding;description=DNA-directed RNA polymerase (beta chain) RpoB (transcriptase beta chain) (RNA polymerase beta subunit);gene_id=Rv0667;logic_name=ena	missense_variant	p.Val496Met	G	A,T
S_1082615	1	1082615	5.45e-08	0.00178651	2239	0.592269	0.597697	4.27e-05	-1.73943	Rv0972c	ID=gene:Rv0972c;Name=fadE12;biotype=protein_coding;description=Acyl-CoA dehydrogenase FadE12;gene_id=Rv0972c;logic_name=ena	missense_variant	p.Gln379Arg	T	C
S_2307900	1	2307900	5.45e-08	0.00178651	2239	0.592269	0.597697	4.27e-05	-1.73943	Rv2050	ID=gene:Rv2050;biotype=protein_coding;description=Conserved protein;gene_id=Rv2050;logic_name=ena	missense_variant	p.Arg27His	G	A
S_2376233	1	2376233	5.45e-08	0.00178651	2239	0.592269	0.597697	4.27e-05	-1.73943	Rv2115c	ID=gene:Rv2115c;Name=mpa;biotype=protein_coding;description=Mycobacterial proteasome ATPase Mpa;gene_id=Rv2115c;logic_name=ena	missense_variant	p.Ser20Gly	T	C
S_2917098	1	2917098	5.45e-08	0.00178651	2239	0.592269	0.597697	4.27e-05	-1.73943	Rv2589	ID=gene:Rv2589;Name=gabT;biotype=protein_coding;description=4-aminobutyrate aminotransferase GabT (gamma-amino-N-butyrate transaminase) (GABA transaminase) (glutamate:succinic semialdehyde transaminase) (GABA aminotransferase) (GABA-at);gene_id=Rv2589;logic_name=ena	missense_variant	p.Ala247Thr	G	A
S_4107876	1	4107876	5.45e-08	0.00178651	2239	0.592269	0.597697	4.27e-05	-1.73943	Rv3667	ID=gene:Rv3667;Name=acs;biotype=protein_coding;description=Acetyl-coenzyme A synthetase Acs (acetate--CoA ligase) (acetyl-CoA synthetase) (acetyl-CoA synthase) (acyl-activating enzyme) (acetate thiokinase) (acetyl-activating enzyme) (acetate--coenzyme A ligase) (acetyl-coenzyme A synthase);gene_id=Rv3667;logic_name=ena	missense_variant	p.Tyr29Asp	T	G
S_4321907	1	4321907	5.45e-08	0.00178651	2239	0.592269	0.597697	4.27e-05	-1.73943	Rv3847	ID=gene:Rv3847;biotype=protein_coding;description=Hypothetical protein;gene_id=Rv3847;logic_name=ena	missense_variant	p.Gly124Arg	G	A
S_932830	1	932830	5.45e-08	0.00178651	2239	0.592269	0.597697	4.27e-05	-1.73943	Rv0836c	ID=gene:Rv0836c;biotype=protein_coding;description=Hypothetical protein;gene_id=Rv0836c;logic_name=ena	missense_variant	p.Asn35Asp	T	C
S_1655082	1	1655082	5.45e-08	0.00178651	2239	0.592269	0.597697	4.27e-05	1.73943	Rv1467c	ID=gene:Rv1467c;Name=fadE15;biotype=protein_coding;description=Probable acyl-CoA dehydrogenase FadE15;gene_id=Rv1467c;logic_name=ena	missense_variant	p.Glu141Lys	C	T
S_2870080	1	2870080	5.45e-08	0.00178651	2239	0.592269	0.597697	4.27e-05	1.73943	Rv2549c	ID=gene:Rv2549c;Name=vapC20;biotype=protein_coding;description=Possible toxin VapC20;gene_id=Rv2549c;logic_name=ena	missense_variant	p.Ala15Thr	C	T
S_3797178	1	3797178	5.45e-08	0.00178651	2239	0.592269	0.597697	4.27e-05	1.73943	Rv3382c	ID=gene:Rv3382c;Name=lytB1;biotype=protein_coding;description=Probable LYTB-related protein LytB1;gene_id=Rv3382c;logic_name=ena	missense_variant	p.Gly87Glu	C	T
S_597882	1	597882	1.27e-07	0.000893256	2239	0.592269	0.597394	9.51e-05	-1.76326	Rv0507	ID=gene:Rv0507;Name=mmpL2;biotype=protein_coding;description=Probable conserved transmembrane transport protein MmpL2;gene_id=Rv0507;logic_name=ena	missense_variant	p.Ile228Met	C	G
S_1838646	1	1838646	1.78e-10	0.0319339	2239	0.592269	0.599762	2.15e-07	1.93856	Rv1633	ID=gene:Rv1633;Name=uvrB;biotype=protein_coding;description=Probable excinuclease ABC (subunit B-helicase) UvrB;gene_id=Rv1633;logic_name=ena	missense_variant	p.Ala524Val	C	T
