# Supplementary material for: GWAS and functional studies suggest a role for altered DNA repair in the evolution of drug resistance in Mycobacterium tuberculosis
Source: eLife. 2023 Jan 25;12:e75860. doi: 10.7554/eLife.75860 (PMC9876569; doi:10.7554/eLife.75860)
Supplement: Supplementary file 5. — The table contains non-upstream gene variants identified in the multidrug-resistant/extensively drug-resistant strains. [file elife-75860-supp5.xlsx]

## Sheet: Sheet1
Supplementary File 5:Upstream gene variant identified in the association analysis
SNP	Chromosome	Position	P.value	maf	nobs	Rsquare.of.Model.without.SNP	Rsquare.of.Model.with.SNP	FDR_Adjusted_P-values	effect			Variant	Wild type	Mutated
S_1673425	1	1673425	7.11e-37	0.0241179	2239	0.592269	0.622716	1.14e-31	1.1547		fabG1 upstream region	upstream_gene_variant	C	T
S_1472362	1	1472362	4.49e-36	0.0216615	2239	0.592269	0.621999	2.66e-31	1.87791	EBG00000313325	ID=gene:EBG00000313325;Name=rrs;biotype=rRNA;gene_id=EBG00000313325;logic_name=ena_rna	upstream_gene_variant	C	T
S_1473246	1	1473246	7.17e-24	0.0147387	2239	0.592269	0.611216	1.64e-19	1.03312	EBG00000313325	ID=gene:EBG00000313325;Name=rrs;biotype=rRNA;gene_id=EBG00000313325;logic_name=ena_rna	upstream_gene_variant	A	G
S_533067	1	533067	2.11e-22	0.00692273	2239	0.592269	0.609939	3.75e-18	1.70125			upstream_gene_variant	G	A
S_2715346	1	2715346	1.1e-18	0.00513622	2239	0.592269	0.606727	1.36e-14	-1.52205			upstream_gene_variant	G	A
S_3364677	1	3364677	1.18e-12	0.00357302	2239	0.592269	0.601594	3.83e-09	-1.97595			upstream_gene_variant	G	A
S_2052919	1	2052919	7.49e-12	0.00625279	2239	0.592269	0.600916	1.6e-08	-1.89198			upstream_gene_variant	T	G
S_3427239	1	3427239	7.49e-12	0.00625279	2239	0.592269	0.600916	1.6e-08	-1.89198			upstream_gene_variant	G	C
S_4025736	1	4025736	7.49e-12	0.00625279	2239	0.592269	0.600916	1.6e-08	-1.89198			upstream_gene_variant	T	C
S_1476356	1	1476356	1.76e-10	0.0031264	2239	0.592269	0.599767	2.15e-07	-2.0601	EBG00000313339	ID=gene:EBG00000313339;Name=rrl;biotype=rRNA;gene_id=EBG00000313339;logic_name=ena_rna	upstream_gene_variant	CTTCCCCAAGAGTC	ACCGCCCAAGAGTT
S_2205550	1	2205550	1.78e-10	0.0319339	2239	0.592269	0.599762	2.15e-07	1.93856			upstream_gene_variant	A	G
S_3557244	1	3557244	1.78e-10	0.0319339	2239	0.592269	0.599762	2.15e-07	1.93856			upstream_gene_variant	C	G
S_4216783	1	4216783	1.78e-10	0.0319339	2239	0.592269	0.599762	2.15e-07	1.93856			upstream_gene_variant	A	C
S_2468180	1	2468180	1.78e-10	0.0319339	2239	0.592269	0.599762	2.15e-07	-1.93856			upstream_gene_variant	G	A
S_2982595	1	2982595	4.66e-10	0.0321572	2239	0.592269	0.599414	5.17e-07	-1.68109			upstream_gene_variant	GT	G
S_1473198	1	1473198	5.61e-10	0.00357302	2239	0.592269	0.599346	6.15e-07	1.25454	EBG00000313325	ID=gene:EBG00000313325;Name=rrs;biotype=rRNA;gene_id=EBG00000313325;logic_name=ena_rna	upstream_gene_variant	GC	G
S_1652	1	1652	9.57e-10	0.0015632	2239	0.592269	0.599153	1.03e-06	2.69412			upstream_gene_variant	C	A
S_1023883	1	1023883	1.26e-09	0.0317106	2239	0.592269	0.599052	1.25e-06	-1.82638			upstream_gene_variant	G	A
S_1473177	1	1473177	2.03e-10	0.439482	2239	0.592269	0.599714	2.43e-07	-1.11398	EBG00000313325	ID=gene:EBG00000313325;Name=rrs;biotype=rRNA;gene_id=EBG00000313325;logic_name=ena_rna	upstream_gene_variant	G	A
S_2238033	1	2238033	3.05e-10	0.00602948	2239	0.592269	0.599567	3.44e-07	-1.74628			upstream_gene_variant	T	C
S_4321479	1	4321479	8.15e-09	0.0328272	2239	0.592269	0.598379	7.67e-06	-1.56231			upstream_gene_variant	G	A
S_1476381	1	1476381	1.77e-08	0.0031264	2239	0.592269	0.598101	1.58e-05	-1.88049	EBG00000313339	ID=gene:EBG00000313339;Name=rrl;biotype=rRNA;gene_id=EBG00000313339;logic_name=ena_rna	upstream_gene_variant	GATG	CGGT
S_701315	1	701315	5.45e-08	0.00178651	2239	0.592269	0.597697	4.27e-05	-1.73943			upstream_gene_variant	T	C
S_1472753	1	1472753	5.45e-08	0.00178651	2239	0.592269	0.597697	4.27e-05	1.73943	EBG00000313325	ID=gene:EBG00000313325;Name=rrs;biotype=rRNA;gene_id=EBG00000313325;logic_name=ena_rna	upstream_gene_variant	A	C
S_2726142	1	2726142	8.45e-08	0.0031264	2239	0.592269	0.597539	6.53e-05	-1.09663		OxyR'-ahpC region	upstream_gene_variant	G	A
S_1473191	1	1473191	6.6e-08	0.00178651	2239	0.592269	0.597628	5.13e-05	-2.20189	EBG00000313325	ID=gene:EBG00000313325;Name=rrs;biotype=rRNA;gene_id=EBG00000313325;logic_name=ena_rna	upstream_gene_variant	C	T
S_1472754	1	1472754	3.19e-09	0.00491291	2239	0.592269	0.598717	3.08e-06	-1.06801	EBG00000313325	ID=gene:EBG00000313325;Name=rrs;biotype=rRNA;gene_id=EBG00000313325;logic_name=ena_rna	upstream_gene_variant	G	T
