# Supplementary material for: GWAS and functional studies suggest a role for altered DNA repair in the evolution of drug resistance in Mycobacterium tuberculosis
Source: eLife. 2023 Jan 25;12:e75860. doi: 10.7554/eLife.75860 (PMC9876569; doi:10.7554/eLife.75860)
Supplement: Supplementary file 6. — The table contains Stop codon or frameshift mutations identified in the multidrug-resistant/extensively drug-resistant strains. [file elife-75860-supp6.xlsx]

## Sheet: Sheet1
Supplementary File 6 :Stop codon or frame shift mutations identified in the association analysis
SNP	Chromosome	Position	P.value	maf	nobs	Rsquare.of.Model.without.SNP	Rsquare.of.Model.with.SNP	FDR_Adjusted_P-values	effect	Gene		Variant	Amino acid change	Wild type	Mutated
S_2608091	1	2608091	4.95e-25	0.491291	2239	0.592269	0.612228	1.32e-20	2.58203	Rv2333c	ID=gene:Rv2333c;Name=stp;biotype=protein_coding;description=Integral membrane drug efflux protein Stp;gene_id=Rv2333c;logic_name=ena	frameshift_variant	p.Gly78fs	T	TA
S_3197223	1	3197223	8.89e-20	0.431889	2239	0.592269	0.607669	1.19e-15	2.15701	Rv2888c	ID=gene:Rv2888c;Name=amiC;biotype=protein_coding;description=Probable amidase AmiC (aminohydrolase);gene_id=Rv2888c;logic_name=ena	frameshift_variant	p.Pro355fs	GC	CC,GCC
S_2546803	1	2546803	2.45e-12	0.00334971	2239	0.592269	0.601325	7e-09	2.00173	Rv2274c	ID=gene:Rv2274c;Name=mazF8;biotype=protein_coding;description=Possible toxin MazF8;gene_id=Rv2274c;logic_name=ena	start_lost	p.Met1?	C	T
S_1293463	1	1293463	3.58e-12	0.00245645	2239	0.592269	0.601186	1e-08	3.51421	Rv1164	ID=gene:Rv1164;Name=narI;biotype=protein_coding;description=Probable respiratory nitrate reductase (gamma chain) NarI;gene_id=Rv1164;logic_name=ena	stop_gained	p.AlaIleAla20*	GCGATCG	TAGATCT
S_4326994	1	4326994	1.15e-11	0.00357302	2239	0.592269	0.600759	2.36e-08	-2.87944	Rv3854c	ID=gene:Rv3854c;Name=ethA;biotype=protein_coding;description=Monooxygenase EthA;gene_id=Rv3854c;logic_name=ena	frameshift_variant	p.Pro160fs	CG	C
S_2604740	1	2604740	1.78e-10	0.0319339	2239	0.592269	0.599762	2.15e-07	1.93856			start_lost	p.Met1?	A	G
S_1710601	1	1710601	1.78e-10	0.0319339	2239	0.592269	0.599762	2.15e-07	-1.93856	Rv1518	ID=gene:Rv1518;biotype=protein_coding;description=Conserved hypothetical protein;gene_id=Rv1518;logic_name=ena	stop_lost&splice_region_variant	p.Ter320Lysext*	T	A
S_3109512	1	3109512	1.78e-10	0.0319339	2239	0.592269	0.599762	2.15e-07	-1.93856	Rv2800	ID=gene:Rv2800;biotype=protein_coding;description=Possible hydrolase;gene_id=Rv2800;logic_name=ena	stop_gained	p.Trp366*	G	A
S_4175847	1	4175847	1.78e-10	0.0319339	2239	0.592269	0.599762	2.15e-07	-1.93856	Rv3728	ID=gene:Rv3728;biotype=protein_coding;description=Probable conserved two-domain membrane protein;gene_id=Rv3728;logic_name=ena	stop_gained	p.Trp325*	G	A
S_657777	1	657777	3.05e-10	0.00602948	2239	0.592269	0.599567	3.44e-07	1.74628	Rv0566c	ID=gene:Rv0566c;biotype=protein_coding;description=Conserved protein;gene_id=Rv0566c;logic_name=ena	stop_gained	p.Ser88*	G	T
S_3031090	1	3031090	7.3e-09	0.0323805	2239	0.592269	0.598419	6.91e-06	-1.60275	Rv2719c	ID=gene:Rv2719c;biotype=protein_coding;description=Possible conserved membrane protein;gene_id=Rv2719c;logic_name=ena	stop_gained	p.Gln150*	G	A
S_3307750	1	3307750	6.61e-08	0.0015632	2239	0.592269	0.597628	5.13e-05	2.76201	Rv2955c	ID=gene:Rv2955c;biotype=protein_coding;description=Conserved protein;gene_id=Rv2955c;logic_name=ena	stop_gained	p.Glu266*	C	A
S_1149142	1	1149142	1.74e-08	0.0169719	2239	0.592269	0.598107	1.56e-05	-1.89445	Rv1028c	ID=gene:Rv1028c;Name=kdpD;biotype=protein_coding;description=Probable sensor protein KdpD;gene_id=Rv1028c;logic_name=ena	frameshift_variant	p.Thr848fs	CTG	C
S_3311567	1	3311567	9.1e-08	0.00558285	2239	0.592269	0.597513	7e-05	-1.25359	Rv2958c	ID=gene:Rv2958c;biotype=protein_coding;description=Possible glycosyl transferase;gene_id=Rv2958c;logic_name=ena	disruptive_inframe_deletion	p.Leu141_Ile144del	GGAATGCCGGCTA	G
