# Supplementary material for: GWAS and functional studies suggest a role for altered DNA repair in the evolution of drug resistance in Mycobacterium tuberculosis
Source: eLife. 2023 Jan 25;12:e75860. doi: 10.7554/eLife.75860 (PMC9876569; doi:10.7554/eLife.75860)
Supplement: Supplementary file 7. — The table contains codon usage in the MDR/XDR and Rv strain. [file elife-75860-supp7.xlsx]

## Sheet: Sheet1
Supplementary File 7: Codon usage in the MDR/XDR strains
Amino acid change	Wild type	Mutated	Codon in WT	Codon usage of WT	Codon usage in mutated strains	Codon usage in mutated strains
p.Ile203Ile	C	T	ATC	33.9	6.5	ATT
p.Lys416Lys	G	A	AAG	15.1	5.3	AAA
p.Leu203Leu	G	A	CTG	50.4	4.7	CTA
p.Glu1317Glu	T	C	GAA	16.2	30.6	GAG
p.Asp144Asp	C	T	GAC	42.2	15.7	GAT
p.Tyr97Tyr	T	C	TAT	6.1	14.6	TAC
p.Gln287Gln	T	C	CAA	8.1	22.8	CAG
p.Leu300Leu	C	T	CTG	50.4	5.4	CTT
p.His40His	G	A	CAC	15.8	6.4	CAT
p.Val197Val	A	T	GTT	8	4.7	GTA
p.Tyr311Tyr	C	T	TAC	14.6	6.1	TAT
p.Ile39Ile	A	G	ATT	6.5	33.9	ATC
p.Ser43Ser	C	T	TCC	11.5	2.2	TCT
p.Ser10Ser	C	T	TCG	19.4	17.9	TTG
p.Arg265Arg	G	A	CGG	24.6	7.2	CGA
p.Pro125Pro	G	A	CCC	17	3.4	CCT
p.Thr149Thr	G	A	ACG	15.6	4.5	ACA
p.Pro49Pro	G	A	CCG	31.6	6.1	CCA
p.Asp1226Asp	T	C	GAT	15.7	42.2	GAC
p.Thr15Thr	A	G	ACA	4.5	15.6	ACG
p.Leu19Leu	C	T	CTG	17.3	5.4	CTT
p.Thr243Thr	C	G	ACC	35.2	15.6	ACG
p.Leu578Leu	G	A	CTG	50.4	4.7	CTA
p.Ala29Ala	C	T	GCC	59.9	15.7	GCT
p.Val115Val	T	C	GTA	4.7	40.1	GTG
p.Ile155Ile	G	A	ATC	33.9	6.5	ATT
p.Leu299Leu	C	T	CTG	17.3	5.4	CTT
p.Ser127Ser	C	T	AGC	14.5	3.5	AGT
p.His8His	A	G	CAT	6.4	15.8	CAC
p.Cys246Cys	C	T	TGC	6.6	2.2	TGT
p.Gly269Gly	G	T	GGG	19.2	18.8	GGT
p.Ala1029Ala	C	G	GCC	59.8	48.7	GCG
p.Pro161Pro	C	T	CCC	17	5.4	CCT
p.Glu102Glu	G	A	GAG	30.6	16.2	GAA
p.Ala88Ala	G	A	GCG	48.7	12.8	GCA
p.Gly69Gly	G	C	GGG	19.2	50.8	GGC
p.Gly614Gly	G	A	GGC	19.2	9.9	GGA
p.Thr184Thr	G	A	ACC	15.6	4.5	ACA
p.Ala26Ala	G	C	GCC	59.8	48.7	GCG
p.Leu241Leu	G	A	CTG	50.4	4.7	CTA
p.Val140Val	T	C	GTA	4.7	32.7	GTC
p.Pro208Pro	G	A	CCG	31.6	6.1	CCA
p.Pro758Pro	G	T	CCC	31.6	8.4	CGT
p.Arg159Arg	T	G	CGT	8.4	24.6	CGG
p.Leu188Leu	G	C	CTC	17.3	50.4	CTG
p.Lys200Lys	T	C	AAA	5.3	15.1	AAG
p.Pro68Pro	T	G	CCA	6.1	17	CCC
p.Val57Val	C	T	GTC	32.7	8	GTT
p.Arg197Arg	G	A	CGG	24.6	7.2	CGA
p.Leu141Leu	G	A	CTA	17.3	4.7	CTA
p.His98His	G	A	CAC	15.8	6.4	CAT
p.Leu257Leu	G	A	CTG	50.4	4.7	CTA
p.Glu116Glu	G	A	GAG	30.6	16.2	GAA
p.Ile190Ile	G	A	ATC	50.4	4.7	CTA
p.Leu77Leu	C	T	CTG	17.3	5.4	CTT
p.Pro164Pro	A	T	CCT	6.1	3.4	CCT
p.Ser42Ser	C	T	TCG	19.4	3.5	AGT
p.Leu18Leu	G	A	CTG	50.4	4.7	CTA
p.Cys175Cys	T	C	TGT	2.2	6.6	TGC
p.Leu153Leu	G	A	CTG	50.4	4.7	CTA
p.Thr223Thr	G	A	ACC	35.2	4.5	ACA
p.Leu147Leu	G	A	CTC	17.3	5.4	CTT
