# Supplementary material for: GWAS and functional studies suggest a role for altered DNA repair in the evolution of drug resistance in Mycobacterium tuberculosis
Source: eLife. 2023 Jan 25;12:e75860. doi: 10.7554/eLife.75860 (PMC9876569; doi:10.7554/eLife.75860)
Supplement: Supplementary file 8. — The table consists of percentage of mutation and blosum score of genes that harbor s under different conditions. [file elife-75860-supp8.xlsx]

## Sheet: Sheet1
Supplementary File 8: Mutations identified in different strains
Gene	Rv invitro	RvDmutY in vitro	RvDmutY::mutY in vitro	RvDmutY::mutY R262Q in vitro	Rv GP	RvDmutY GP	RvDmutY::mutY GP	RvDmutY::mutY R262Q GP	Rv ex	RvDmutY ex	RvDmutY::mutY ex	RvDmutY::mutY R262Q ex	Rv inh ex	RvDmutY inh ex	RvDmutY::mutY inh	RvDmutY::mutY R262Q inh ex	Rv rif ex	RvDmutY rif ex	RvDmutY::mutY rif ex	RvDmutY::mutY R262Q rif ex	Rv cipro ex	RvDmutY cipro ex	RvDmutY::mutY cipro ex	RvDmutY::mutY R262Q cipro ex	blosum
gyrA-1:p.Asp94Tyr	0	0	0	0	0	0	0	0	0	0	0	0	0	0	0	16.8	0	0	0	0	0	99.15	0	79.3	-3
Rv0197-1:p.Ile747Asn	0	0	0	0	0	0	0	0	0	20.82	0	0	0	0	0	0	0	0	0	0	0	0	0	0	-3
Rv0278c-1:p.Trp892Arg	0	0	0	0	0	0	0	0	0	0	0	0	8.18	0	0	0	0	0	0	0	0	7.59	0	0	-3
Rv0278c-1:p.Arg891Trp	0	0	0	0	0	0	0	0	0	0	0	0	7.65	0	0	0	0	0	0	0	0	7.16	0	0	-3
tcrA-1:p.Val62Gly	0	0	0	0	0	23.53	22.34	0	0	0	0	0	0	0	0	5.8	0	0	0	0	0	0	0	0	-3
tcrA-1:p.Val59Gly	0	0	0	0	0	0	0	0	0	0	0	27.39	0	19.87	18.18	0	0	0	0	0	0	24.6	0	0	-3
Rv0746-1:p.Asp348Val	0	0	0	0	0	0	0	0	0	0	0	0	0	0	0	0	0	0	10.74	0	12.71	0	0	0	-3
phoR-1:p.Leu222Pro	0	0	0	0	0	0	0	0	0	0	0	0	0	0	0	0	0	0	0	0	0	0	10.04	0	-3
echA7-1:p.Cys13Gly	0	0	0	0	15.7	0	0	0	15.29	12.83	0	0	0	12.63	0	0	0	13.8	0	0	0	0	0	0	-3
Rv1575-1:p.Val131Gly	0	0	0	0	0	0	0	0	0	0	0	0	0	11.54	0	0	0	0	0	0	7.96	0	28.37	0	-3
katG-1:p.Ser315Thr	0	0	0	0	0	0	0	0	0	0	0	0	28.91	0	0	0	0	0	0	0	0	0	0	0	-3
Rv2146c-1:p.Arg72Trp	0	0	0	0	0	0	0	0	0	0	21.92	0	0	0	0	0	0	0	0	0	0	0	0	0	-3
mas-1:p.Val496Gly	34.75	38.87	32.36	45.86	38.66	46.15	29.09	46.18	40.74	39.5	0	42.73	38.99	20.57	42.78	46.57	39.84	46.59	43.05	43.16	44.71	38.07	0	49.43	-3
Rv3514-1:p.Cys857Gly	0	0	0	0	0	0	0	0	0	100	0	0	0	0	0	100	0	100	0	0	100	100	0	0	-3
Rv3514-1:p.Cys871Gly	0	0	0	0	0	0	0	0	0	100	0	0	0	0	0	100	0	100	100	0	100	100	0	0	-3
Rv3514-1:p.Val874Gly	0	0	0	0	0	0	0	0	0	100	0	0	0	0	0	100	0	100	100	0	100	100	0	0	-3
Rv3514-1:p.Val875Gly	0	0	0	0	0	0	0	0	0	100	0	0	0	0	0	100	0	100	100	0	100	100	0	0	-3
Rv3645-1:p.Val174Gly	34.65	33.62	0	0	32.53	17.27	0	0	0	32.08	0	0	34.61	0	0	31.48	0	35.02	0	0	31.75	28.29	0	38.49	-3
hycQ-1:p.Phe114Cys	0	0	0	0	0	0	0	0	0	0	0	19.94	0	0	0	0	0	0	0	0	0	0	0	0	-2
Rv0124-1:p.Leu215Arg	28.38	0	18.99	18.42	28.91	18.71	0	0	0	18.23	0	36.02	24.75	26.01	23.36	0	24.84	0	26.79	27.37	0	19.08	33.2	0	-2
cobQ1-1:p.Leu114Arg	0	0	0	4.53	0	23.26	0	19.76	22.2	0	0	0	0	23	8.44	0	15.76	0	7.48	5.87	0	0	6.82	6.21	-2
dnaK-1:p.Glu600Gly	0	0	0	0	0	0	0	0	0	0	0	0	0	0	0	0	0	17.47	0	0	0	0	0	0	-2
Rv0377-1:p.Leu64Arg	0	0	27.85	28.6	0	0	0	0	25	24.33	0	0	21.58	0	25.15	33.88	28.16	25.89	21.49	0	22.09	0	29.75	0	-2
Rv0477-1:p.Phe148Cys	0	0	0	0	0	0	0	0	0	0	0	0	0	0	17.2	0	0	0	0	0	0	0	0	0	-2
tcrA-1:p.His57Pro	31.1	26.88	26.53	19.48	0	0	31.84	0	0	0	33.33	0	0	21.47	25.47	23.25	0	0	31.03	27.21	24.59	30.69	0	19.38	-2
rpoB-1:p.His445Pro	0	0	0	0	0	0	0	0	0	0	0	0	0	0	0	0	0	0	0	36.03	0	0	0	0	-2
rpoB-1:p.Ser450Leu	0	0	0	0	0	0	0	0	0	0	0	0	0	0	0	0	0	0	0	46.57	0	0	0	0	-2
mapA-1:p.Phe68Cys	0	15.43	0	0	0	0	19.04	0	20.86	0	0	19.51	20.16	23.05	0	0	21.68	23.79	0	0	17.46	0	16.23	21.76	-2
Rv0746-1:p.Leu593Arg	0	20.28	0	0	0	0	0	0	0	0	0	0	0	0	0	0	0	0	0	0	0	0	0	0	-2
Rv1452c-1:p.Arg412Gly	41.71	50	40.66	31.82	47.29	46.3	37	45.71	42.31	40.16	47.06	46.67	34.12	40.16	45.19	43.36	34.68	41.48	38.17	38.14	40.25	42.29	35.25	46.28	-2
Rv1575-1:p.Arg141Pro	0	0	0	0	0	0	0	30.55	0	0	0	0	0	8.07	0	0	0	0	25.33	27.82	0	0	28.92	0	-2
hisI-1:p.Pro113His	0	0	0	0	13.01	27.04	29.27	0	0	0	0	0	0	0	0	0	0	0	0	0	0	0	0	0	-2
Rv1647-1:p.Leu226Arg	20.14	0	0	19.79	0	0	0	16.13	0	18.84	0	0	0	0	0	18.44	0	0	20.22	0	18.84	18.8	16.33	15.81	-2
pks7-1:p.Leu520Arg	0	0	0	20.84	0	0	22.47	0	18.64	0	0	0	0	0	0	0	0	0	0	0	0	0	0	0	-2
Rv1742-1:p.Leu60Ser	0	0	0	0	0	0	0	0	0	0	14.89	0	0	0	0	0	0	0	0	0	0	0	0	0	-2
Rv1765c-1:p.Arg111Gly	0	0	0	0	0	0	0	0	0	0	0	0	0	0	0	0	44.44	0	0	0	0	0	0	0	-2
katG-1:p.Ser315Ile	0	0	0	0	0	0	0	0	0	0	0	0	10.39	28.18	0	0	0	0	0	0	0	0	0	0	-2
mce3R-1:p.Pro351His	0	0	0	0	0	0	0	0	0	0	0	0	0	0	0	0	0	30.25	0	0	0	0	0	0	-2
Rv2028c-1:p.Asp79Ala	0	19.91	20.26	0	0	0	0	0	0	0	0	0	0	0	14.48	0	0	0	0	19.67	0	0	0	0	-2
murD-1:p.Arg252Gly	0	0	0	23.93	23.8	0	0	21.72	24.72	0	25.47	0	0	23.4	0	0	0	0	0	20.89	0	21.9	21.61	22.66	-2
PPE40-1:p.Phe46Cys	0	0	16.58	20.76	0	0	21.2	0	0	0	0	21.5	17.27	20.25	0	23.47	20.67	19.94	0	20.76	0	0	20.75	0	-2
nrdR-1:p.Phe131Cys	24.93	26.36	27.34	25.03	26.88	29.41	20.79	29.77	24.75	24.4	20	19.53	0	0	31.28	0	23.6	24.76	19.23	24.48	25.75	24.85	0	26.38	-2
Rv2739c-1:p.Leu341Trp	0	29.65	0	31.49	24.84	0	23.32	35.29	0	24.11	0	26.3	32.16	0	32.57	21.35	29.97	0	0	0	0	0	0	0	-2
ppsA-1:p.His955Pro	23.11	15.9	22.49	15.51	34.41	27.59	26.9	25.62	26.94	17.37	0	31.29	36.27	29.26	23.67	28.44	0	21.5	26.49	20.21	29.82	24.27	29.04	30.06	-2
ppsC-1:p.His889Pro	0	0	0	15.02	0	22.22	0	24.32	0	0	0	23.31	0	0	25.06	0	0	20.2	21.13	0	0	0	0	0	-2
mas-1:p.Arg497Pro	0	0	0	0	0	0	0	26.84	23.12	26.99	0	28.36	0	0	21.06	0	0	0	0	22.32	0	0	0	24.94	-2
mas-1:p.His493Pro	56.39	42.86	44.26	47.43	50.54	49.18	33.94	53.16	41.93	26.48	0	48.87	9	38.93	45.18	52.76	53.02	42.09	48.51	49.67	48.76	51.4	0	54.73	-2
Rv2989-1:p.Arg2Gly	83.67	99.45	99.51	98.97	42.61	61.49	56.39	98.47	11.34	100	100	100	38.2	95.93	100	99.9	0	99.91	100	100	0	99.1	100	100	-2
Rv3207c-1:p.Ser256Tyr	0	0	0	0	0	0	0	0	0	0	0	0	0	0	0	0	0	0	0	0	0	0	0	55.8	-2
Rv3239c-1:p.Arg18Gly	23.5	25.35	27.08	22.71	0	22.77	0	0	0	0	0	24.15	0	0	0	0	22.4	20.89	0	23.13	0	0	0	19.52	-2
Rv3433c-1:p.Trp404Gly	13.6	0	9.5	11.86	0	0	0	10.54	0	0	0	10.23	0	0	0	0	0	0	0	0	0	0	0	0	-2
Rv3514-1:p.Leu185Arg	0	0	0	0	0	0	0	0	0	0	0	33.33	0	0	0	0	0	0	0	0	0	0	0	0	-2
Rv3514-1:p.Asp249Ala	0	0	0	0	0	0	0	0	0	0	0	0	0	0	0	35.85	0	0	0	0	0	0	0	0	-2
Rv3635-1:p.Ile116Thr	0	0	0	0	31.49	56.53	53.16	0	0	0	0	0	0	0	0	0	0	0	0	0	0	0	0	0	-2
dppA-1:p.Phe139Cys	0	0	0	0	0	0	0	0	0	0	0	0	0	0	0	0	0	0	0	0	0	0	0	56.49	-2
leuA-1:p.Phe14Cys	23.31	23.94	0	22.09	22.12	24.78	22.54	22.1	21.98	22.16	25.86	24.17	23.59	19.74	0	23.51	25.58	21.96	0	25.04	0	21.77	20.88	19.44	-2
embB-1:p.Arg24Pro	0	0	0	0	0	0	0	0	0	0	0	0	0	0	0	26.69	0	0	0	0	0	0	0	0	-2
embB-1:p.Leu172Arg	27.35	0	29.37	31.36	32.65	35.44	41.12	30.99	38.52	29.38	0	25.12	33.94	24.14	30.69	36.35	0	34.13	27.79	30.13	25.57	31.7	25.2	36.75	-2
espI-1:p.Arg286Pro	30.03	0	27.68	0.82	29.22	23.01	27.99	31.28	28.41	19.28	0	11.03	18.63	0	0	12.69	29.51	0	27.79	32.74	0	25.66	23.93	23.54	-2
gid-1:p.Gly34Trp	0	0	0	0	0	0	0	0	0	0	0	41.9	0	0	0	0	0	0	0	0	0	0	0	0	-2
gyrA-1:p.Asp94Gly	0	0	0	0	0	0	0	0	0	0	0	0	0	0	0	77.03	0	0	0	0	0	0	0	19.53	-1
Rv0192-1:p.Asn358His	19.94	0	17.6	0	0	19.97	0	0	18.43	0	0	0	17.85	18.14	18.51	19.87	20.05	0	0	0	0	16.36	15.23	0	-1
cobQ1-1:p.Ala115Pro	23.21	0	0	19.16	0	0	0	0	0	0	0	0	0	0	14.89	0	0	0	11.49	16.5	0	0	0	18.69	-1
oplA-1:p.Asp406His	0	0	0	0	0	0	0	0	0	0	0	26.18	0	0	0	0	0	0	0	0	0	0	0	0	-1
Rv0336-1:p.Ala174Glu	0	0	0	0	0	0	0	28.57	0	0	0	0	0	0	0	0	0	0	0	0	0	0	40	0	-1
Rv0377-1:p.Ser66Arg	21.15	0	26.09	29.66	0	32.47	0	0	22.47	23.68	0	18.89	32.75	0	27.43	27.43	23.38	23.37	25.29	0	21.81	0	27.93	27.66	-1
clpB-1:p.Asn42His	0	0	0	23.2	23.43	21.04	20.39	0	25.47	21.84	22.73	23.78	26.34	23.96	21.3	23.78	20.58	21.39	0	24.33	21.25	22.24	20.51	0	-1
tcrA-1:p.Asp63His	0	0	0	0	0	0	0	0	0	0	0	0	0	0	0	23.94	0	0	0	0	0	0	0	0	-1
sppA-1:p.Phe7Val	0	20.86	0	0	0	0	0	0	0	23.85	0	0	0	0	0	0	0	0	0	0	0	0	0	0	-1
Rv0950c-1:p.Glu194Ala	0	0	0	21.63	20.49	0	0	0	0	0	0	0	0	0	0	0	0	0	0	0	0	0	0	20.71	-1
purN-1:p.Asp36Gly	37.81	0	0	38.01	0	0	0	0	5.19	0	0	0	37.55	0	0	0	0	0	0	0	0	0	0	0	-1
galU-1:p.Ala51Pro	0	19.82	21.04	0	20.83	0	23.01	0	24.19	0	0	25	23.37	0	22.87	0	24.42	20.7	21.17	20.74	17.77	0	18.02	17.86	-1
pks16-1:p.Thr352Ala	0	0	0	0	0	0	0	0	0	0	0	0	0	0	0	0	0	0	0	23.87	0	0	0	0	-1
Rv1087-1:p.Ser651Arg	0	0	0	24.53	21.27	0	0	0	0	0	0	0	0	0	0	0	0	0	0	0	0	0	0	0	-1
typA-1:p.Asp191His	0	0	0	0	0	0	0	25.85	20.84	0	0	0	0	0	0	0	0	0	0	0	0	0	0	0	-1
corA-1:p.Ala16Pro	0	0	0	0	0	0	0	0	0	0	0	0	0	0	16.36	0	0	16.22	0	0	17.52	0	0	0	-1
PPE19-1:p.Ala259Thr	37.72	35.48	36.76	35.46	39.95	36.43	37.42	39.24	40.45	39.23	39.47	39.97	41.08	36.74	40.92	37.18	41.33	37.31	38.82	42.65	39.14	38.87	41.64	43.99	-1
Rv1450c-1:p.Asp362His	0	0	0	0	0	0	0	0	0	0	100	0	0	0	0	0	0	0	0	0	0	0	0	0	-1
Rv1647-1:p.Gln224Pro	10.23	0	0	0	0	0	0	0	0	0	0	0	0	0	0	0	0	0	0	0	0	0	0	0	-1
Rv2028c-1:p.Asp79His	24.88	17.19	18.09	22.36	21.32	0	22.89	25.9	18.16	21.59	0	0	22.3	0	23.37	0	22.24	19.71	0	0	0	0	0	0	-1
Rv2126c-1:p.Ala145Pro	0	0	0	0	0	0	0	0	0	0	0	0	0	0	0	0	0	0	0	0	0	0	13.74	0	-1
Rv2162c-1:p.Ala205Pro	56.96	59.38	55.07	51.06	57.14	53.45	32.26	42.65	54.55	23.83	0	67.92	0	58.93	64.1	28.28	67.82	22.84	41.59	0	12.59	34.68	56.6	0	-1
Rv2162c-1:p.Ala199Pro	26.32	0	0	22.62	0	0	0	23.6	0	0	0	0	0	0	0	23.54	40.71	0	0	0	0	27.97	32.9	0	-1
fadD15-1:p.Ala354Pro	18.3	21.77	0	0	0	0	0	21.9	0	0	44.14	0	0	0	0	0	21.45	0	0	0	0	22.18	21.14	22.27	-1
Rv2226-1:p.Ala72Pro	0	22.06	0	0	21.3	0	0	21.03	0	0	0	0	24.23	23.66	23.14	20.3	0	0	22.39	19.56	0	0	0	0	-1
Rv2254c-1:p.Ala90Pro	0	22.58	0	0	21.9	0	20.91	0	21.36	0	0	20.66	0	20.69	0	23.54	0	0	24.24	0	0	0	0	0	-1
esxP-1:p.Ala58Thr	0	0	0	0	0	0	0	0	0	0	7.39	0	0	0	0	0	0	0	0	0	0	0	0	0	-1
Rv2477c-1:p.Asn40His	0	0	0	26.09	17.44	0	0	0	0	0	0	0	0	0	0	0	0	0	0	0	0	0	0	0	-1
Rv2484c-1:p.Thr335Ala	0	0	0	0	0	0	0	0	0	0	0	0	0	0	0	0	0	0	0	0	22.03	0	0	0	-1
nrdR-1:p.Ser132Cys	0	0	0	0	0	0	0	0	0	0	0	0	0	0	0	0	0	0	10.22	0	0	0	0	0	-1
pepR-1:p.Gly421Asp	0	0	0	0	0	0	0	0	0	0	0	0	0	0	0	0	0	0	0	0	22.79	0	0	0	-1
Rv2828A-1:p.Phe45Val	0	0	0	15.43	0	0	0	17.05	0	0	0	18.26	0	0	0	0	23.88	0	0	0	0	0	0	0	-1
smc-1:p.Ala258Pro	0	0	0	18.75	0	22.11	0	18.79	0	0	0	19.76	23.05	22.22	0	0	0	0	0	21.27	17.05	19.86	0	19.91	-1
smc-1:p.Glu257Ala	0	19.61	0	19.01	0	14.33	0	12.77	21.55	0	0	13.55	14.4	19.33	17.15	0	0	0	0	21.68	11.27	21.88	0	20.17	-1
ppsA-1:p.Glu958Ala	0	0	0	0	6.52	0	0	0	8.71	0	0	0	0	18.31	0	0	0	0	14.64	0	8.92	0	0	0	-1
gatA-1:p.Ala486Pro	0	0	0	0	0	23.11	0	0	0	0	0	25.85	0	0	25.75	0	0	0	0	0	0	0	0	0	-1
gatA-1:p.Ala485Pro	0	0	0	0	0	11.79	0	0	0	0	0	0	0	0	14.6	0	0	0	0	0	0	0	0	0	-1
gatA-1:p.Glu484Ala	0	0	0	0	0	0	0	0	0	0	0	0	0	0	11.89	0	0	0	0	0	0	0	0	0	-1
Rv3169-1:p.Ala194Pro	0	0	28.57	0	36.95	0	35.64	0	35.09	21.15	0	17.25	40	0	0	34.43	0	0	34.05	0	20.69	34.6	0	0	-1
Rv3433c-1:p.Ala406Pro	25.94	0	18.5	22	0	0	0	21.56	0	0	16.35	23.64	0	0	0	0	0	0	0	0	0	0	0	0	-1
PPE60-1:p.Ala215Thr	100	0	0	100	100	100	0	0	100	100	0	0	0	100	0	0	100	0	100	0	0	0	0	100	-1
Rv3514-1:p.Gly557Asp	14.93	17.14	0	0	14.67	0	12.96	0	12.7	21	45.45	14.49	16.67	20.88	16.67	19.52	8.93	19.95	15.65	27.59	18.12	22.16	0	26.32	-1
Rv3586-1:p.Glu110Ala	0	0	0	0	0	0	0	0	0	0	0	0	0	0	0	0	0	0	0	0	0	0	0	23.07	-1
Rv3590c-1:p.Asn228His	0	0	0	0	0	0	0	0	0	0	0	0	0	0	0	0	0	0	0	0	0	0	11.76	0	-1
Rv3590c-1:p.Phe226Val	0	0	25.35	0	18.95	0	18.18	0	0	19.35	0	21.18	0	0	0	22.22	0	0	0	0	0	25.18	21.43	0	-1
Rv3604c-1:p.Pro199Gln	0	0	0	0	0	0	0	0	0	0	0	0	0	0	0	0	0	0	0	33.69	0	0	0	0	-1
lipE-1:p.Asp119His	0	0	0	0	0	0	0	0	21.82	20.23	0	0	0	0	0	0	0	0	0	0	0	0	0	0	-1
embB-1:p.Ser174Arg	21.46	0	0	23.34	0	0	25.6	0	0	0	0	18.58	0	0	0	23.48	0	0	0	0	0	0	0	0	-1
espI-1:p.Ala288Pro	0	0	0	23.1	0	3.67	0	26.48	0	0	0	16.89	9.21	25	20.75	25.28	0	0	0	0	0	0	22.73	0	-1
espI-1:p.Ser295Arg	0	0	0	21.4	0	0	0	18.26	0	0	0	0	17.79	23.52	20.1	18.77	0	0	0	0	0	0	6.88	0	-1
fadD4-1:p.Ala64Gly	0	0	0	0	0	0	0	0	0	0	0	0	0	0	0	0	0	21.54	0	0	0	0	0	0	0
Rv0229c-1:p.Gly223Ala	0	0	0	0	0	0	0	0	0	0	0	0	0	0	0	0	0	0	0	0	0	0	7.98	0	0
mshA-1:p.Ala254Gly	0	0	0	27.46	25.81	0	0	24.87	0	30.75	0	0	0	28.47	0	0	0	29.4	0	0	0	30.85	0	0	0
Rv0532-1:p.Gly162Ala	0	0	0	0	0	0	0	0	0	0	0	0	0	0	31.49	0	0	0	0	0	0	0	0	0	0
pncB2-1:p.Lys461Thr	0	0	0	0	0	0	0	0	0	0	22.45	0	0	0	22.71	0	7.11	0	0	0	0	20.56	6.97	20.16	0
mce2C-1:p.Asn356Thr	0	0	0	0	17.9	0	0	0	0	0	0	0	0	0	0	0	0	0	0	0	0	0	0	0	0
Rv0746-1:p.Ala345Gly	24.78	0	0	0	0	0	0	24.36	0	0	29.41	0	30.54	0	0	20.28	0	0	0	0	0	20.91	0	22.31	0
Rv0746-1:p.Ala650Gly	14.53	0	0	0	16.73	13.85	0	0	0	0	0	9.56	0	24.75	0	0	0	16.56	0	0	0	20.38	0	0	0
Rv0754-1:p.Ala200Gly	0	0	0	0	20.62	0	0	0	0	0	0	0	21.77	0	0	0	0	20.55	0	0	0	0	0	0	0
Rv0813c-1:p.Lys189Thr	27.89	21.77	25.07	27.03	26.93	23.04	31.05	22.52	24.72	28.32	31.44	29.15	28.12	29.65	0	28.54	29.69	26.11	20.05	24.92	0	26.22	25.57	28.82	0
echA7-1:p.Ala11Gly	0	21.24	0	0	21.04	0	0	25.75	22.36	18.28	18.23	0	0	22.35	0	16.94	0	20.13	21.39	22.76	0	0	19.42	20.71	0
lpqU-1:p.Gly53Ala	24.87	25.67	26.03	0	27.1	27.2	20.75	23.29	24.23	19.67	27.15	24.77	28.48	24.46	26.21	0	24.62	22.25	0	25.59	20.71	24.01	27.83	23.36	0
Rv1125-1:p.Ala175Gly	0	0	0	0	0	0	0	0	0	0	0	0	25.28	0	21.89	0	0	0	0	21.18	0	0	0	0	0
corA-1:p.Val15Ala	0	0	0	0	0	0	0	0	0	0	0	0	0	0	12.97	12.32	0	12.47	15.4	0	15.72	0	0	0	0
Rv1325c-1:p.Ala171Gly	0	0	0	0	0	0	0	0	0	0	0	0	0	0	0	0	24.55	0	0	0	0	0	0	0	0
Rv1325c-1:p.Ala168Gly	0	10.26	0	7.58	0	0	5.63	0	0	0	0	0	0	0	0	0	23.48	0	0	0	0	0	19.69	0	0
PPE19-1:p.Phe269Leu	27.04	25.12	26.66	26.34	29.46	26.82	28.16	30.09	30.24	28.34	30.07	31.09	29.98	26.28	32.08	29.05	30.65	26.26	28.04	31.49	29.04	29.03	32.54	33.46	0
PPE19-1:p.Val67Ala	19.27	19.11	16.95	19.62	19.75	16.98	19.67	19.21	20.89	23.72	18.88	20	20.48	19.74	18.27	23.06	19.17	22.75	22.46	21.96	24.44	21.88	21.7	23.66	0
wag22-1:p.Ala434Gly	0	0	0	0	0	0	0	0	17.39	23.86	0	19.67	0	22.7	0	0	0	0	0	23.99	0	24.1	0	18.06	0
wag22-1:p.Ala431Gly	0	0	0	0	0	0	0	0	16.2	23.27	0	16.63	0	20.63	0	0	0	0	0	23.22	0	25.08	0	19.55	0
Rv1765c-1:p.Ala112Gly	0	0	0	0	0	0	0	0	0	0	0	0	0	0	0	0	44.44	0	0	0	0	0	0	0	0
Rv1929c-1:p.Gly177Ala	50.48	0	0	0	0	0	0	0	0	0	0	0	0	0	0	0	0	0	0	0	0	0	0	0	0
Rv1999c-1:p.Ala43Gly	0	0	20.18	26.49	20.05	0	0	25	0	0	0	25.17	26.21	0	0	25.73	28	0	22.56	30.61	20.19	0	26	29.2	0
Rv2015c-1:p.Ala112Gly	0	0	0	0	0	0	0	28.57	0	0	0	0	0	0	0	0	0	0	0	0	0	0	0	0	0
Rv2015c-1:p.Ala109Gly	0	0	0	0	0	0	0	28.57	0	0	0	0	0	0	0	0	0	0	0	0	0	0	0	0	0
mshC-1:p.Ala210Gly	0	0	22.92	21.52	23.62	23.51	22.49	18.47	0	0	0	22	0	0	0	18.88	0	18.6	14.1	20.77	0	0	18.36	21.15	0
esxP-1:p.Leu96Phe	0	0	0	0	0	0	0	0	0	0	7.73	0	0	0	0	0	0	0	0	0	0	0	0	0	0
valS-1:p.Lys335Thr	0	21.06	0	0	0	19.7	0	21.18	0	0	0	0	0	0	0	0	19.33	0	0	0	0	0	19.57	0	0
Rv2733c-1:p.Lys365Thr	18.26	0	0	0	0	0	0	0	0	0	0	0	0	0	0	0	0	0	17.24	0	0	0	0	0	0
fadD29-1:p.Asn558Thr	0	26.08	0	28.29	0	20.85	0	0	0	24.65	18.18	24.29	0	0	0	24.2	22.71	0	0	26.84	0	0	0	0	0
Rv3169-1:p.Ala190Gly	33.33	0	22.15	0	0	22.58	0	24.43	33.2	0	0	21.55	32.71	28.81	0	33.23	29.63	0	0	30.21	0	27.33	0	34.31	0
atsB-1:p.Lys447Thr	0	21.02	0	0	20.37	16.19	18.01	17.48	21.36	19.43	0	0	0	18.24	0	16.6	0	0	18.87	18.51	0	19.67	0	0	0
Rv3367-1:p.Ala540Gly	0	0	0	0	0	0	31.06	0	21.77	17.73	0	0	0	0	0	0	0	17.89	0	0	0	0	27.37	0	0
Rv0229c-1:p.Thr224Pro	0	0	0	0	0	0	0	0	0	0	0	0	0	0	0	0	0	0	0	0	0	0	12.23	0	1
oplA-1:p.Thr404Pro	0	0	0	0	0	0	0	0	0	0	0	13.18	0	0	0	0	0	0	0	0	0	0	0	0	1
PPE19-1:p.Gln286Arg	9.63	8.11	9.15	9.07	9.12	8.34	11.03	10.56	10.24	9.37	9.64	15.03	9.57	9.54	14.9	11.4	10.89	9.69	10.94	12.22	10.94	11.36	12.1	13.58	1
PPE19-1:p.Ser260Asn	36.34	34.73	35.48	34.41	38.21	35.28	36.21	38.28	38.97	38.03	38.07	38.99	39.93	35.41	39.42	36.04	40.1	35.31	37.39	41.81	38.18	37.53	40.95	42.6	1
Rv1450c-1:p.Thr345Pro	0	0	0	0	0	0	0	0	0	10	0	0	0	0	0	0	0	0	0	0	0	0	0	0	1
scpA-1:p.Val51Leu	0	0	0	0	23.31	52.05	50.12	0	0	0	0	0	0	0	0	0	0	0	0	0	0	0	0	0	1
Rv1929c-1:p.Thr172Ser	10.39	21.92	0	8.33	0	14.08	23.6	6.12	13.56	15.56	8.33	10.61	13.85	0	21.92	10.53	10.87	10.09	0	10.67	14.91	29.17	0	20.69	1
Rv1929c-1:p.Ser168Ala	0	15.11	0	0	0	0	0	0	0	12.81	0	0	0	17.99	0	19	0	0	0	0	0	0	0	0	1
Rv1931c-1:p.Ser84Ala	19.66	0	0	0	0	0	0	0	0	0	24.02	0	0	0	0	0	0	0	0	0	0	0	0	0	1
pks12-1:p.Thr449Pro	0	0	0	0	0	0	0	0	0	0	0	0	0	0	0	0	0	0	21.88	0	0	0	0	0	1
Rv2162c-1:p.Thr198Pro	0	0	0	0	0	0	0	0	0	0	0	0	0	0	0	9.09	0	0	0	0	0	0	11.28	0	1
ppsA-1:p.Thr953Pro	0	0	0	0	27.18	0	0	0	0	0	0	24.05	0	24.76	30.28	24.84	0	0	0	0	0	0	0	21.49	1
ppsA-1:p.Thr965Pro	0	0	0	1.64	0	10.22	11.19	0	0	2.92	0	0	11.14	0	0	0	0	0	0	0	0	0	0	0	1
Rv3415c-1:p.Ser187Ala	0	0	0	20.72	0	0	0	18.76	0	0	0	0	0	20.57	0	0	0	0	0	0	0	0	0	0	1
PPE60-1:p.Gln216Lys	100	0	0	100	100	100	0	0	100	100	0	0	0	100	0	0	100	0	100	0	0	0	0	100	1
Rv3514-1:p.Ser852Ala	0	0	0	0	0	0	0	0	0	97.96	0	0	0	0	0	100	0	100	0	0	100	100	0	0	1
espI-1:p.Thr285Pro	0	0	0	27.07	0	0	0	24.64	0	0	0	16.16	0	30.54	21.4	17.59	0	0	0	0	0	0	7.55	0	1
Rv0229c-1:p.Ile225Leu	0	0	0	0	0	0	18.32	24.88	0	0	0	0	0	23.68	0	0	0	0	0	0	0	0	28.45	22.96	2
htdX-1:p.Leu127Met	0	0	0	0	0	0	0	0	0	0	0	0	0	0	0	0	0	0	25.89	0	0	0	0	0	2
rpoB-1:p.His445Tyr	0	0	0	0	0	0	0	0	0	0	0	0	0	0	0	0	0	64.8	0	0	0	0	0	0	2
phoR-1:p.Glu214Asp	0	0	0	0	0	0	0	0	0	0	0	0	0	0	0	0	0	0	0	0	0	0	15.06	0	2
Rv1000c-1:p.Leu25Ile	0	0	0	0	0	0	0	0	0	0	0	0	0	0	0	0	0	0	0	0	0	0	0	16.73	2
PPE19-1:p.Gln282Glu	13.3	10.64	13.04	12.02	13.55	12.49	15.18	13.21	15.6	13.6	14.9	14.38	14.88	13.48	14.77	15.5	15.78	13.99	14.57	15.54	14.06	15.07	16.49	18.53	2
PPE19-1:p.Glu85Gln	11.17	10.49	9.24	11.09	11.35	10.91	10.26	12.46	11.22	11.45	13.12	12.65	11.65	11.62	10.85	14.13	11.37	10.61	12.69	13.89	13.65	10.85	12.66	12.65	2
gmk-1:p.Ile81Leu	0	0	0	0	0	0	0	19.92	0	0	0	0	0	0	0	0	0	0	0	0	0	0	0	0	2
ppsA-1:p.Glu958Gln	0	0	0	0	10.14	0	0	0	11.24	0	0	0	0	22.64	0	0	0	0	19.13	0	11.79	0	0	0	2
ppsA-1:p.Glu958Asp	18.09	0	0	12.83	16.54	19.92	20.52	15.56	9.23	21.54	0	19.53	7.17	0	21.48	5.45	0	0	0	17.13	9.3	13.07	22.83	15.32	2
ftsX-1:p.Glu248Asp	0	0	0	0	0	0	0	0	0	0	0	0	0	13.56	0	0	0	0	0	0	0	0	0	0	2
Rv3169-1:p.Glu188Asp	0	28.98	0	0	0	0	0	0	0	0	16	0	0	0	0	0	0	0	21.43	19.9	0	18.42	16.86	0	2
Rv3406-1:p.Ile18Leu	26.14	26.81	26.7	26.93	28.89	25.51	24.08	25.9	27.55	25.18	19.8	26.11	23.32	23.33	22.85	25.41	25.85	22.07	21.94	23.34	25.61	27.12	23.64	23.77	2
Rv3587c-1:p.Tyr161His	85.13	99.6	98.85	99.32	46.22	63.66	64.46	99.08	13.99	100	100	100	37.21	95.63	100	99.89	0	99.89	100	100	0	99.66	100	99.88	2
wag22-1:p.Leu282Val	0	11.84	0	0	0	0	0	0	0	0	0	0	0	0	0	0	0	0	18.06	0	0	0	0	0	3
esxQ-1:p.Leu105Val	0	0	0	0	0	0	0	0	0	0	0	0	24	0	29.85	25.54	0	0	19.8	0	0	0	17.13	12.14	3
