# Supplementary material for: GWAS and functional studies suggest a role for altered DNA repair in the evolution of drug resistance in Mycobacterium tuberculosis
Source: eLife. 2023 Jan 25;12:e75860. doi: 10.7554/eLife.75860 (PMC9876569; doi:10.7554/eLife.75860)
Supplement: Supplementary file 9. — The table consists of oligonucleotide used in the study. [file elife-75860-supp9.xlsx]

## Sheet: Sheet1
Supplementary File 9: Oligonucleiotide used in the study
S.No.	Gene	Oligonucleiotide
1	MutY 5' flank forward primer	5’CACCTTTTGCATAAATTGCGATATCaacctttgacggccagcgt3’
2	MutY 5' flank reverse primer	5’TTTTTTTTGCATTTCTTGCcgggctgacaccgggctct 3’
3	MutY 3' flank forward primer	5’CACCTTTTGCATAGATTGCggctgaccgataccgcaca 3’
4	MutY 3' flank reverse primer	5’TTTTTTTTGCATCTTTTGCGATATCaaccaacgggatgaacccg3’
5	Screening reverse primer	5’ggcgggcggggccgcggtcat 3’
6	Hygromycin forward primer	5’CGATCCGGAGGAACTGGCGCA 3’
7	MutY gene forward primer	5’caccCATATGcctcacatactgccg 3’
8	MutY gene reverse primer	5’ttttAAGCTTctaaaacccttcgccggg 3’
9	MutY SDM gene forward primer	5’ttttGCTCTTCAcaggccgagttggacgtggcg 3’
10	MutY SDM gene reverse primer	5’ttttGCTCTTCActgggtgagcgggaaactccgcg 3’
11	UvrB gene forward primer	5’caccCATATGcgcgccggcggtcacttc 3’
12	UvrB gene reverse primer	5’ttttAAGCTTtcacttcaggccggccgcgtc 3’
13	UvrB SDM gene forward primer	5’ctggtggcgatcctcgacgtcgacaaagaaggattcctg 3’
14	UvrB SDM gene reverse primer	5’caggaatccttctttgtcgacgtcgaggatcgccaccag 3’
